# Supplementary material for: Catalytic asymmetric cyclopropanation of sulfoxonium ylides catalyzed by a chiral-at-metal rhodium complex
Source: Royal Society of Chemistry journal article supplement (doi:10.1039/d2qo01068b), 2022-01-01
Supplement: d2qo01068b1.pdf [file d2qo01068b1.pdf]

Supporting Information for:

**Catalytic Asymmetric Cyclopropanation of Sulfoxonium Ylides**

**Catalyzed by a Chiral-at-Metal Rhodium Complex**

Siliang Ming<sup>†, a</sup>, Jian Yang<sup>†, a</sup>, Shi Wu,<sup>a</sup> Gang Yao,<sup>a</sup> Hongwei Xiong,<sup>a</sup> Yu Du,<sup>b</sup> and Jun Gong<sup>\*a</sup>

<sup>a</sup> School of Pharmacy, Hubei University of Science and Technology, Xianning, Hubei 437100, P. R. China. E-mail: gongjun@hbust.edu.cn

<sup>b</sup> State Key Laboratory of Structural Chemistry, Fujian Institute of Research on the Structure of Matter, Chinese Academy of Sciences, Fuzhou 350002, P. R. China.

<sup>†</sup> These authors contributed equally to this work.

## Contents

|                                                        |            |
|--------------------------------------------------------|------------|
| <b>1. General Information</b>                          | <b>3</b>   |
| <b>2. Synthesis of Catalysts</b>                       | <b>4</b>   |
| <b>3. Synthesis of Substrates</b>                      | <b>5</b>   |
| <b>4. Asymmetric Cyclopropanation Reactions</b>        | <b>6</b>   |
| <b>5. Synthetic Transformations</b>                    | <b>35</b>  |
| <b>6. <sup>1</sup>H and <sup>13</sup>C NMR Spectra</b> | <b>38</b>  |
| <b>7. HPLC Traces on Chiral Stationary Phase</b>       | <b>74</b>  |
| <b>8. Single Crystal X-Ray Diffraction Study</b>       | <b>106</b> |
| <b>9. References</b>                                   | <b>108</b> |

## 1. General Information

All non-aqueous reactions were performed in oven-dried glassware and standard Schlenk tubes under an atmosphere of argon. Dichloromethane (DCM) and 1,2-dichloroethane (DCE) were distilled from CaH<sub>2</sub> under inert atmosphere. Tetrahydrofuran (THF) and toluene were distilled from sodium and benzophenone under inert atmosphere. All other solvents and reagents were used as received unless otherwise noted. Thin layer chromatography was performed using silica gel 60 F-254 precoated plates (0.2~0.3 mm) and visualized by short-wave UV (254 nm) irradiation, potassium permanganate, or iodine stain. Column chromatography was performed with silica gel (200-300 mesh, Yantai Jiangyou Silica Gel Development Co., Ltd). The <sup>1</sup>H, <sup>13</sup>C and <sup>19</sup>F NMR spectra were obtained in CDCl<sub>3</sub> using a Bruker-BioSpin AVANCE III HD 400 NMR spectrometer, respectively. Chemical shifts (δ) for <sup>1</sup>H NMR spectra are recorded in parts per million from tetramethylsilane with the solvent resonance as the internal standard (chloroform, δ 7.26 ppm). Data are reported as follows: chemical shift, multiplicity (s = singlet, d = doublet, t = triplet, q = quartet, qn = quintet, m = multiplet and br = broad), coupling constant in Hz, and integration. Chemical shifts for <sup>13</sup>C NMR spectra are recorded in parts per million from tetramethylsilane using the central peak of deuteriochloroform (δ 77.00 ppm) as the internal standard. The infrared spectra were recorded on a VERTEX 70 IR spectrometer as KBr pellets, with absorption reported in cm<sup>-1</sup>. Optical rotation was recorded on INESA SGW-1 polarimeter at concentrations of 0.1 g/100 mL or 0.2 g/100 mL. Enantiomeric excess was determined by HPLC analysis on Chiralpak column (Daicel Chemical Industries, LTD) on Shimadzu LC-20AD. High-resolution mass spectra were recorded on a Bruker Impact II UHR TOF LC/MS Mass Spectrometry.

## 2. Synthesis of Catalysts

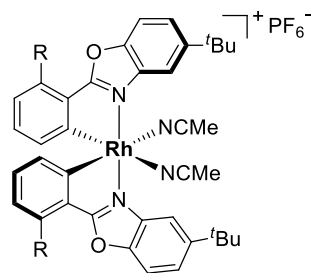

- $\Lambda$ -Rh1 R = 3,5-Me<sub>2</sub>C<sub>6</sub>H<sub>3</sub>  
 $\Lambda$ -Rh2 R = 3,5-(CF<sub>3</sub>)<sub>2</sub>C<sub>6</sub>H<sub>3</sub>  
 $\Lambda$ -Rh3 R = H

Racemic rhodium catalyst *rac*-Rh3 and chiral catalyst  $\Lambda$ -Rh3 were prepared according to reported procedures developed by Meggers' group.<sup>[1]</sup>  $\Lambda$ -Rh1<sup>[2]</sup>,  $\Lambda$ -Rh2<sup>[3]</sup> were synthesized following published procedures.

### 3. Synthesis of Substrates

#### 3.1 Synthesis of $\alpha,\beta$ -unsaturated 2-acylimidazoles

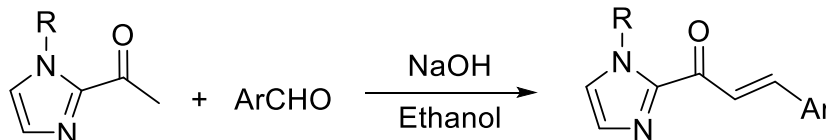

$\alpha,\beta$ -unsaturated 2-acylimidazoles **1** were prepared by *Aldol* reaction according to a reported procedure.<sup>[3]</sup> 2-acetyl-imidazole (10.0 mmol, 1.0 eq.) and ethanol (50 mL) were added to a 100 mL round-bottom flask followed by the aromatic aldehyde (12 mmol, 1.2 eq.) and NaOH (5 mmol, 0.5 eq.). The solution was stirred at room temperature until the substrates consumption (detected by TLC). The reaction mixture was then quenched with saturated aqueous  $\text{NH}_4\text{Cl}$  and the mixture was extracted with EtOAc ( $3 \times 30$  mL). The combined organic layer was washed with 50 mL brine and dried over anhydrous  $\text{Na}_2\text{SO}_4$ , filtered and concentrated under vacuum. The residue was purified by a flash column chromatography on silica gel to afford the desired product **1**.

**1n** was prepared according to published procedures.<sup>[4]</sup> **1q** was prepared according to published procedures.<sup>[5]</sup> **1r** was prepared according to published procedures.<sup>[6]</sup> **1v** was prepared according to published procedures.<sup>[7]</sup> **1w** was prepared according to published procedures.<sup>[8]</sup>

#### 3.2 Synthesis of sulfur ylides

The sulfoxonium ylides **2a-2k** were prepared according to a reported method.<sup>[9]</sup> **2l** was prepared according to published procedures.<sup>[10]</sup> **2m** was prepared according to published procedures.<sup>[11]</sup>

## 4. Asymmetric Cyclopropanation Reactions

### 4.1 Synthesis of racemic products as HPLC references

**General Procedure:** A dried 25 mL Schlenk tube was charged with  $\alpha,\beta$ -unsaturated 2-acylimidazoles **1** (0.20 mmol), sulfoxonium ylides **2** (0.24 mmol) and racemic catalyst *rac*-**Rh3** (1.7 mg, 1.0 mol %). The tube was purged with argon, then DCE (0.6 mL) was added. The reaction mixture was stirred at 30°C for indicated time (monitored by TLC) under argon. After cooling to room temperature, the mixture was purified by flash column chromatography on silica gel (petroleum ether/ EtOAc = 10:1 to 5:1) to afford racemic products as HPLC reference for determination of enantiomeric excess.

### 4.2 Substrate Scope

**General Procedure:** A dried 25 mL Schlenk tube was charged with  $\alpha,\beta$ -unsaturated 2-acylimidazoles **1** (0.20 mmol), sulfoxonium ylides **2** (0.24 mmol) and chiral catalyst  **$\Lambda$ -Rh3** (0.83 mg, 0.5 mol %). The tube was purged with argon, then DCE (0.6 mL) was added. The reaction mixture was stirred at 30°C for indicated time (monitored by TLC) under argon. After cooling to room temperature, the mixture was purified by flash column chromatography on silica gel (petroleum ether/ EtOAc = 10:1 to 5:1) to afford chiral products.

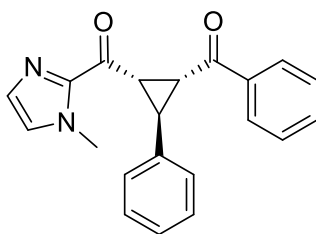

**3aa**

Following **General Procedure**, a dried 25 mL Schlenk tube was charged with  $\alpha,\beta$ -unsaturated 2-acylimidazole **1a** (42.5 mg, 0.20 mmol), sulfoxonium ylide **2a**

(47.1 mg, 0.24 mmol) and chiral catalyst **A-Rh3** (0.83 mg, 0.5 mol %). The tube was purged with argon, then DCE (0.6 mL) was added. The reaction mixture was stirred at 30°C for indicated time (monitored by TLC) under argon. After cooling to room temperature, the mixture was purified by flash column chromatography on silica gel (petroleum ether/ EtOAc = 10:1 to 5:1) to afford chiral product **3aa** as pale yellow oil (64.1 mg, yield: 97%).

Enantiomeric excess was determined by HPLC analysis, *ee* = 99%, Chiralpak column AS-H,  $\lambda$  = 254 nm, *n*-hexane/*i*-PrOH = 85:15, flow rate: 1.0 mL/min, 30 °C,  $t_r$ (minor) = 12.841 min,  $t_r$ (major) = 15.743 min;

$[\alpha]_D^{25} = -175.8^\circ$  ( $c = 0.2$ , CHCl<sub>3</sub>);

IR (KBr)  $\nu_{\max}$ : 2980, 1671, 1510, 1459, 1432, 1373, 1320, 1284, 1237, 1143 cm<sup>-1</sup>;

<sup>1</sup>H NMR (400 MHz, CDCl<sub>3</sub>):  $\delta$  = 8.02 (d,  $J = 7.3$  Hz, 2H), 7.51 (t,  $J = 7.4$  Hz, 1H), 7.43 – 7.29 (m, 6H), 7.28 – 7.22 (m, 1H), 7.15 (s, 1H), 7.00 (s, 1H), 4.15 – 4.10 (m, 1H), 3.90 (s, 3H), 3.57 (t,  $J = 6.3$  Hz, 1H), 3.35 (dd,  $J = 9.6, 6.5$  Hz, 1H);

<sup>13</sup>C NMR (101 MHz, CDCl<sub>3</sub>):  $\delta$  = 194.07, 185.90, 143.34, 138.45, 137.02, 133.15, 129.15, 128.70, 128.52, 127.05, 126.70, 38.60, 36.25, 36.14, 30.67;

HRMS (ESI, *m/z*) calcd. for C<sub>21</sub>H<sub>18</sub>N<sub>2</sub>O<sub>2</sub>Na<sup>+</sup> [M+Na]<sup>+</sup>: 353.1266, found: 353.1261.

Alternatively, **3aa** can also be synthesized with sulfur ylide **2l**. Following **General Procedure**, a dried 25 mL Schlenk tube was charged with  $\alpha,\beta$ -unsaturated 2-acylimidazole **1a** (42.5 mg, 0.20 mmol), sulfur ylide **2l** (43.2 mg, 0.24 mmol) and chiral catalyst **A-Rh3** (1.6 mg, 1.0 mol %). The tube was purged with argon, then DCE (0.6 mL) was added. The reaction mixture was stirred at 30°C for indicated time (monitored by TLC) under argon. After cooling to room temperature, the mixture was purified by flash column chromatography on silica gel (petroleum ether/ EtOAc = 10:1 to 5:1) to afford chiral product **3aa** as pale yellow oil (62.8 mg, yield: 95%). Dr = 8:1 was determined by crude <sup>1</sup>H NMR analysis, *ee* = 98% (for the major diastereoisomer).

In the scale-up synthesis, a dried 25 mL flask was charged with  $\alpha,\beta$ -unsaturated 2-acylimidazole **1a** (424.5 mg, 2.0 mmol), sulfoxonium ylide **2a** (471.0 mg, 2.4 mmol) and chiral catalyst  **$\Lambda$ -Rh3** (8.3 mg, 0.5 mol% or 1.7 mg, 0.1 mol%). The tube was purged with argon, then DCE (5.0 mL) was added. The reaction mixture was stirred at 30°C (monitored by TLC) under argon. After cooling to room temperature, the mixture was purified by flash column chromatography on silica gel (petroleum ether/EtOAc = 10:1 to 5:1) to afford chiral product **3aa** as pale yellow oil (630.6 mg, 95% yield or 564.0 mg, 85% yield). Enantiomeric excess was determined by HPLC analysis,  $ee = 99\%$ .

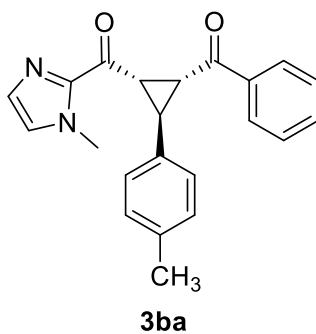

Following **General Procedure**, a dried 25 mL Schlenk tube was charged with  $\alpha,\beta$ -unsaturated 2-acylimidazole **1b** (45.3 mg, 0.20 mmol), sulfoxonium ylide **2a** (47.1 mg, 0.24 mmol) and chiral catalyst  **$\Lambda$ -Rh3** (0.83 mg, 0.5 mol %). The tube was purged with argon, then DCE (0.6 mL) was added. The reaction mixture was stirred at 30°C for indicated time (monitored by TLC) under argon. After cooling to room temperature, the mixture was purified by flash column chromatography on silica gel (petroleum ether/ EtOAc = 10:1 to 5:1) to afford chiral product **3ba** as pale yellow oil (66.8 mg, yield: 97%).

Enantiomeric excess was determined by HPLC analysis,  $ee = 98\%$ , Chiralpak column AS-H,  $\lambda = 254$  nm,  $n$ -hexane/ $i$ -PrOH = 85:15, flow rate: 1.0 mL/min, 30 °C,  $t_r$ (minor) = 12.455 min,  $t_r$ (major) = 15.568 min;

$[\alpha]_D^{25} = -48.0^\circ$  ( $c = 0.1$ ,  $\text{CHCl}_3$ );



IR (KBr)  $\nu_{\text{max}}$ : 2924, 1658, 1594, 1579, 1514, 1469, 1456, 1441, 1399, 1311, 1286, 1221, 1178, 1157, 1087  $\text{cm}^{-1}$ ;

$^1\text{H}$  NMR (400 MHz,  $\text{CDCl}_3$ ):  $\delta$  = 8.04 – 7.97 (m, 2H), 7.51 (t,  $J$  = 7.4 Hz, 1H), 7.39 (t,  $J$  = 7.6 Hz, 2H), 7.23 – 7.18 (m, 2H), 7.17 – 7.11 (m, 3H), 6.99 (s, 1H), 4.09 (dd,  $J$  = 9.6, 6.0 Hz, 1H), 3.90 (s, 3H), 3.54 (t,  $J$  = 6.3 Hz, 1H), 3.31 (dd,  $J$  = 9.6, 6.6 Hz, 1H), 2.34 (s, 3H);

$^{13}\text{C}$  NMR (101 MHz,  $\text{CDCl}_3$ ):  $\delta$  = 194.16, 186.09, 143.47, 137.08, 136.70, 135.41, 133.09, 129.37, 129.24, 128.51, 128.51, 127.00, 126.58, 38.59, 36.18, 36.10, 30.50, 21.08;

HRMS (ESI,  $m/z$ ) calcd. for  $\text{C}_{22}\text{H}_{20}\text{N}_2\text{O}_2\text{Na}^+$  [ $\text{M}+\text{Na}$ ] $^+$ : 367.1423, found: 367.1417.

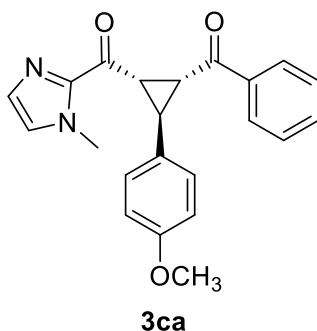

A dried 25 mL Schlenk tube was charged with  $\alpha,\beta$ -unsaturated 2-acylimidazole **1c** (48.5 mg, 0.20 mmol), sulfoxonium ylide **2a** (47.1 mg, 0.24 mmol) and chiral catalyst  $\Lambda$ -**Rh3** (0.83 mg, 0.5 mol %). The tube was purged with argon, then DCE (0.6 mL) was added. The reaction mixture was stirred at 30°C for indicated time (monitored by TLC) under argon. After cooling to room temperature, the mixture was purified by flash column chromatography on silica gel (petroleum ether/ EtOAc = 10:1 to 5:1) to afford chiral product **3ca** as pale yellow oil (67.0 mg, yield: 93%).

Enantiomeric excess was determined by HPLC analysis,  $ee$  = 98%, Chiralpak column IC,  $\lambda$  = 254 nm,  $n$ -hexane/ $i$ -PrOH = 80:20, flow rate: 1.0 mL/min, 30 °C,  $t_r$ (minor) = 24.443 min,  $t_r$ (major) = 34.027 min;

$[\alpha]_{\text{D}}^{25}$  = -62.0° ( $c$  = 0.1,  $\text{CHCl}_3$ );

IR (KBr)  $\nu_{\text{max}}$ : 3141, 2956, 2830, 2050, 1672, 1648, 1613, 1597, 1581, 1518, 1450, 1414, 1399, 1324, 1306, 1282, 1261, 1251, 1224  $\text{cm}^{-1}$ ;

$^1\text{H}$  NMR (400 MHz,  $\text{CDCl}_3$ ):  $\delta$  = 8.04 – 7.99 (m, 2H), 7.54 – 7.48 (m, 1H), 7.39 (td,  $J$  = 8.3, 7.1 Hz, 2H), 7.26 – 7.21 (m, 2H), 7.14 (d,  $J$  = 1.0 Hz, 1H), 6.99 (s, 1H), 6.90 – 6.85 (m, 2H), 4.07 (dd,  $J$  = 9.5, 6.1 Hz, 1H), 3.89 (s, 3H), 3.80 (s, 3H), 3.53 (t,  $J$  = 6.3 Hz, 1H), 3.29 (dd,  $J$  = 9.5, 6.6 Hz, 1H);

$^{13}\text{C}$  NMR (101 MHz,  $\text{CDCl}_3$ ):  $\delta$  = 194.16, 186.14, 158.71, 143.52, 137.09, 133.09, 130.47, 129.31, 128.51 (overlap, 4C), 127.84, 127.03, 114.10, 55.35, 38.47, 36.13, 36.11, 30.21;

HRMS (ESI,  $m/z$ ) calcd. for  $\text{C}_{22}\text{H}_{20}\text{N}_2\text{O}_2\text{Na}^+$  [ $\text{M}+\text{Na}$ ] $^+$ : 383.1372, found: 383.1366.

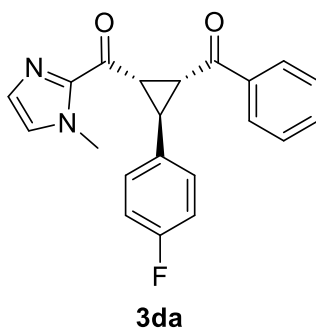

A dried 25 mL Schlenk tube was charged with  $\alpha,\beta$ -unsaturated 2-acylimidazole **1d** (46.1 mg, 0.20 mmol), sulfoxonium ylide **2a** (47.1 mg, 0.24 mmol) and chiral catalyst  $\Lambda$ -**Rh3** (0.83 mg, 0.5 mol %). The tube was purged with argon, then DCE (0.6 mL) was added. The reaction mixture was stirred at 30°C for indicated time (monitored by TLC) under argon. After cooling to room temperature, the mixture was purified by flash column chromatography on silica gel (petroleum ether/ EtOAc = 10:1 to 5:1) to afford chiral product **3da** as pale yellow oil (66.9 mg, yield: 96%).

Enantiomeric excess was determined by HPLC analysis,  $ee$  = 99%, Chiralpak column IC,  $\lambda$  = 254 nm,  $n$ -hexane/ $i$ -PrOH = 90:10, flow rate: 1.0 mL/min, 30 °C,  $t_r$ (minor) = 19.511 min,  $t_r$ (major) = 22.872 min;

$[\alpha]_{\text{D}}^{25}$  = -134.2° ( $c$  = 0.2,  $\text{CHCl}_3$ );

IR (KBr)  $\nu_{\text{max}}$ : 3107, 1681, 1673, 1593, 1577, 1515, 1470, 1445, 1403, 1331, 1314, 1275, 1215, 1166, 1160  $\text{cm}^{-1}$ ;

$^1\text{H}$  NMR (400 MHz,  $\text{CDCl}_3$ ):  $\delta$  = 8.04 – 7.98 (m, 2H), 7.52 (t,  $J$  = 7.4 Hz, 1H), 7.40 (t,  $J$  = 7.6 Hz, 2H), 7.31 – 7.25 (m, 2H), 7.16 (s, 1H), 7.06 – 6.98 (m, 3H), 4.09 (dd,  $J$  = 9.6, 6.1 Hz, 1H), 3.89 (s, 3H), 3.56 (t,  $J$  = 6.3 Hz, 1H), 3.30 (dd,  $J$  = 9.6, 6.6 Hz, 1H);

$^{13}\text{C}$  NMR (101 MHz,  $\text{CDCl}_3$ ):  $\delta$  = 193.88, 185.72, 161.93 (d,  $J$  = 245.4 Hz, 1C), 143.32, 136.97, 134.18 (d,  $J$  = 3.2 Hz, 1C), 133.20, 129.28, 128.54, 128.49, 128.36 (d,  $J$  = 8.0 Hz, 2C), 127.13, 115.56 (d,  $J$  = 21.6 Hz, 2C), 38.37, 36.19, 36.11, 29.81;

$^{19}\text{F}$  NMR (376 MHz,  $\text{CDCl}_3$ )  $\delta$  = -115.50;

HRMS (ESI,  $m/z$ ) calcd. for  $\text{C}_{21}\text{H}_{17}\text{FN}_2\text{O}_2\text{Na}^+$  [ $\text{M}+\text{Na}$ ] $^+$ : 371.1172, found: 371.1167.

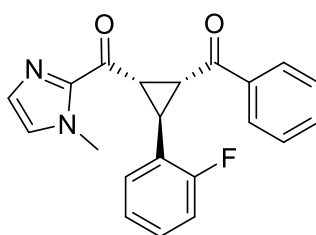

**3ea**

A dried 25 mL Schlenk tube was charged with  $\alpha,\beta$ -unsaturated 2-acylimidazole **1e** (46.1 mg, 0.20 mmol), sulfoxonium ylide **2a** (47.1 mg, 0.24 mmol) and chiral catalyst  **$\Lambda$ -Rh3** (0.83 mg, 0.5 mol %). The tube was purged with argon, then DCE (0.6 mL) was added. The reaction mixture was stirred at 30°C for indicated time (monitored by TLC) under argon. After cooling to room temperature, the mixture was purified by flash column chromatography on silica gel (petroleum ether/ EtOAc = 10:1 to 5:1) to afford chiral product **3ea** as pale yellow oil (66.4 mg, yield: 95%).

Enantiomeric excess was determined by HPLC analysis,  $ee$  = 98%, Chiralpak column ID,  $\lambda$  = 254 nm,  $n$ -hexane/ $i$ -PrOH = 70:30, flow rate: 1.0 mL/min, 30 °C,  $t_r(\text{minor})$  = 18.694 min,  $t_r(\text{major})$  = 22.170 min;

$[\alpha]_{\text{D}}^{25}$  = -111.4° ( $c$  = 0.2,  $\text{CHCl}_3$ );

IR (KBr)  $\nu_{\text{max}}$ : 3113, 2923, 1681, 1661, 1598, 1580, 1498, 1454, 1433, 1399, 1364, 1346, 1319, 1294, 1281, 1240, 1219  $\text{cm}^{-1}$ ;

$^1\text{H}$  NMR (400 MHz,  $\text{CDCl}_3$ ):  $\delta$  = 8.06 – 8.00 (m, 2H), 7.51 (t,  $J$  = 7.6 Hz, 1H), 7.40 (t,  $J$  = 7.6 Hz, 2H), 7.27 – 7.18 (m, 2H), 7.16 – 7.02 (m, 3H), 7.00 (s, 1H), 4.16 (dd,  $J$  = 9.6, 6.2 Hz, 1H), 3.88 (s, 3H), 3.71 (t,  $J$  = 6.5 Hz, 1H), 3.42 (dd,  $J$  = 9.6, 6.7 Hz, 1H);

$^{13}\text{C}$  NMR (101 MHz,  $\text{CDCl}_3$ ):  $\delta$  = 193.84, 185.72, 161.68 (d,  $J$  = 247.3 Hz, 1C), 143.39, 136.98, 133.13, 129.38, 128.59, 128.49, 128.47, 127.90 (d,  $J$  = 3.7 Hz, 1C), 127.15, 125.58 (d,  $J$  = 13.8 Hz, 1C), 124.21 (d,  $J$  = 3.6 Hz, 1C), 115.60 (d,  $J$  = 21.6 Hz, 1C), 36.80 (d,  $J$  = 1.9 Hz, 1C), 36.07, 34.95 (d,  $J$  = 1.6 Hz, 1C), 24.87 (d,  $J$  = 3.9 Hz, 1C);

$^{19}\text{F}$  NMR (376 MHz,  $\text{CDCl}_3$ ):  $\delta$  = -117.75;

HRMS (ESI,  $m/z$ ) calcd. for  $\text{C}_{21}\text{H}_{17}\text{FN}_2\text{O}_2\text{Na}^+$  [ $\text{M}+\text{Na}$ ] $^+$ : 371.1172, found: 371.1167.

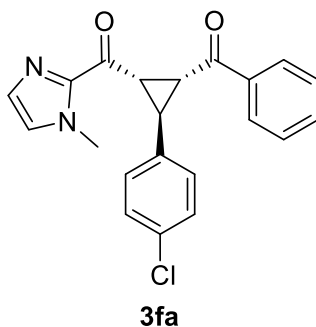

A dried 25 mL Schlenk tube was charged with  $\alpha,\beta$ -unsaturated 2-acylimidazole **1f** (49.4 mg, 0.20 mmol), sulfoxonium ylide **2a** (47.1 mg, 0.24 mmol) and chiral catalyst  **$\Lambda$ -Rh3** (0.83 mg, 0.5 mol %). The tube was purged with argon, then DCE (0.6 mL) was added. The reaction mixture was stirred at 30°C for indicated time (monitored by TLC) under argon. After cooling to room temperature, the mixture was purified by flash column chromatography on silica gel (petroleum ether/ EtOAc = 10:1 to 5:1) to afford chiral product **3fa** as white solid (69.3 mg, yield: 95%), mp 121–122 °C.

Enantiomeric excess was determined by HPLC analysis,  $ee$  > 99%, Chiralpak column AS-H,  $\lambda$  = 254 nm,  $n$ -hexane/ $i$ -PrOH = 85:15, flow rate: 1.0 mL/min, 30 °C,  $t_r$ (minor) = 14.443 min,  $t_r$ (major) = 16.722 min;

$[\alpha]_D^{25} = -81.9^\circ$  ( $c = 0.1$ ,  $\text{CHCl}_3$ );

IR (KBr)  $\nu_{\text{max}}$ : 2923, 1666, 1595, 1577, 1497, 1451, 1407, 1360, 1293, 1270, 1223, 1154, 1110, 1082, 1051, 1015  $\text{cm}^{-1}$ ;

$^1\text{H}$  NMR (400 MHz,  $\text{CDCl}_3$ ):  $\delta = 8.03 - 7.98$  (m, 2H), 7.54 – 7.48 (m, 1H), 7.44 – 7.35 (m, 2H), 7.32 – 7.21 (m, 4H), 7.15 (d,  $J = 1.0$  Hz, 1H), 7.00 (s, 1H), 4.10 (dd,  $J = 9.6, 6.1$  Hz, 1H), 3.87 (s, 3H), 3.55 (t,  $J = 6.3$  Hz, 1H), 3.29 (dd,  $J = 9.7, 6.6$  Hz, 1H);

$^{13}\text{C}$  NMR (101 MHz,  $\text{CDCl}_3$ ):  $\delta = 193.65, 185.61, 143.41, 137.08, 136.93, 133.22, 132.78, 129.48, 128.81, 128.55, 128.49, 128.13, 127.20, 38.30, 36.12, 36.08, 29.76$ ;

HRMS (ESI,  $m/z$ ) calcd. for  $\text{C}_{21}\text{H}_{17}\text{ClN}_2\text{O}_2\text{Na}^+$   $[\text{M}+\text{Na}]^+$ : 387.0877, found: 387.0870.

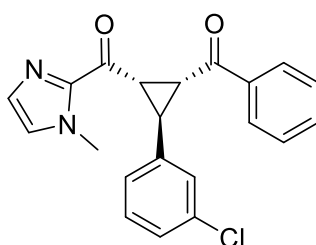

**3ga**

A dried 25 mL Schlenk tube was charged with  $\alpha,\beta$ -unsaturated 2-acylimidazole **1g** (49.4 mg, 0.20 mmol), sulfoxonium ylide **2a** (47.1 mg, 0.24 mmol) and chiral catalyst  **$\Lambda$ -Rh3** (0.83 mg, 0.5 mol %). The tube was purged with argon, then DCE (0.6 mL) was added. The reaction mixture was stirred at 30°C for indicated time (monitored by TLC) under argon. After cooling to room temperature, the mixture was purified by flash column chromatography on silica gel (petroleum ether/ EtOAc = 10:1 to 5:1) to afford chiral product **3ga** as pale yellow oil (70.0 mg, yield: 96%).

Enantiomeric excess was determined by HPLC analysis,  $ee = 99\%$ , Chiralpak column IC,  $\lambda = 254$  nm,  $n$ -hexane/ $i$ -PrOH = 90:10, flow rate: 1.0 mL/min, 30 °C,  $t_r(\text{minor}) = 17.213$  min,  $t_r(\text{major}) = 19.312$  min;

$[\alpha]_D^{25} = -109.9^\circ$  ( $c = 0.1$ ,  $\text{CHCl}_3$ );

IR (KBr)  $\nu_{\text{max}}$ : 2940, 1678, 1605, 1563, 1499, 1430, 1402, 1338, 1291, 1262, 1209, 1169, 1130, 1047  $\text{cm}^{-1}$ ;

$^1\text{H}$  NMR (400 MHz,  $\text{CDCl}_3$ ):  $\delta$  = 8.04 – 7.98 (m, 2H), 7.54 – 7.48 (m, 1H), 7.40 (t,  $J$  = 7.7 Hz, 2H), 7.31 – 7.18 (m, 4H), 7.16 (d,  $J$  = 0.9 Hz, 1H), 7.01 (s, 1H), 4.12 (dd,  $J$  = 9.7, 6.1 Hz, 1H), 3.87 (s, 3H), 3.55 (t,  $J$  = 6.3 Hz, 1H), 3.33 (dd,  $J$  = 9.7, 6.6 Hz, 1H);

$^{13}\text{C}$  NMR (101 MHz,  $\text{CDCl}_3$ ):  $\delta$  = 193.61, 185.41, 143.23, 140.62, 136.87, 134.61, 133.27, 129.94, 129.30, 128.56, 128.51, 127.23, 127.19, 126.80, 125.10, 37.56, 36.22, 36.11, 29.89;

HRMS (ESI,  $m/z$ ) calcd. for  $\text{C}_{21}\text{H}_{17}\text{ClN}_2\text{O}_2\text{Na}^+$  [ $\text{M}+\text{Na}$ ] $^+$ : 387.0877, found: 387.0872.

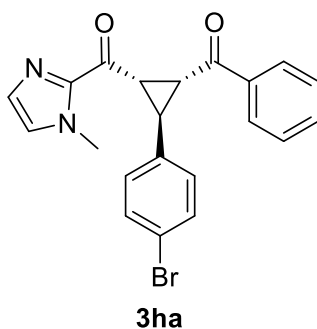

A dried 25 mL Schlenk tube was charged with  $\alpha,\beta$ -unsaturated 2-acylimidazole **1h** (58.2 mg, 0.20 mmol), sulfoxonium ylide **2a** (47.1 mg, 0.24 mmol) and chiral catalyst  **$\Lambda$ -Rh3** (0.83 mg, 0.5 mol %). The tube was purged with argon, then DCE (0.6 mL) was added. The reaction mixture was stirred at 30°C for indicated time (monitored by TLC) under argon. After cooling to room temperature, the mixture was purified by flash column chromatography on silica gel (petroleum ether/ EtOAc = 10:1 to 5:1) to afford chiral product **3ha** as white solid (73.7 mg, yield: 90%), mp 104–105 °C.

Enantiomeric excess was determined by HPLC analysis,  $ee > 99\%$ , Chiralpak column AS-H,  $\lambda$  = 254 nm,  $n$ -hexane/ $i$ -PrOH = 85:15, flow rate: 1.0 mL/min, 30 °C,  $t_r$ (minor) = 15.243 min,  $t_r$ (major) = 17.464 min;

$[\alpha]_D^{25} = -128.7^\circ$  ( $c = 0.2$ ,  $\text{CHCl}_3$ );

IR (KBr)  $\nu_{\text{max}}$ : 2923, 1677, 1658, 1594, 1580, 1489, 1458, 1440, 1403, 1286, 1221, 1180, 1158  $\text{cm}^{-1}$ ;

$^1\text{H}$  NMR (400 MHz,  $\text{CDCl}_3$ ):  $\delta$  = 8.02 – 7.97 (m, 2H), 7.53 – 7.48 (m, 1H), 7.47 – 7.36 (m, 4H), 7.20 – 7.13 (m, 3H), 6.99 (s, 1H), 4.09 (dd,  $J$  = 9.7, 6.1 Hz, 1H), 3.87 (s, 3H), 3.53 (t,  $J$  = 6.3 Hz, 1H), 3.29 (dd,  $J$  = 9.7, 6.6 Hz, 1H);

$^{13}\text{C}$  NMR (101 MHz,  $\text{CDCl}_3$ ):  $\delta$  = 193.66, 185.58, 143.37, 137.61, 136.91, 133.24, 131.76, 129.44, 128.56, 128.49, 128.48, 127.20, 120.81, 38.30, 36.09 (overlap, 2C), 29.83;

HRMS (ESI,  $m/z$ ) calcd. for  $\text{C}_{21}\text{H}_{18}\text{BrN}_2\text{O}_2^+$   $[\text{M}+\text{H}]^+$ : 409.0552, found: 409.0546.

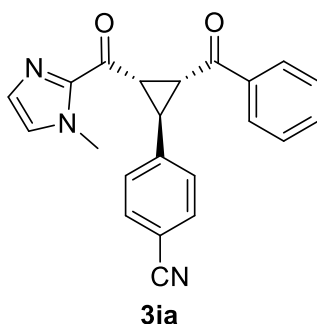

A dried 25 mL Schlenk tube was charged with  $\alpha,\beta$ -unsaturated 2-acylimidazole **1i** (47.5 mg, 0.20 mmol), sulfoxonium ylide **2a** (47.1 mg, 0.24 mmol) and chiral catalyst  $\Lambda$ -**Rh3** (0.83 mg, 0.5 mol %). The tube was purged with argon, then DCE (0.6 mL) was added. The reaction mixture was stirred at 30°C for indicated time (monitored by TLC) under argon. After cooling to room temperature, the mixture was purified by flash column chromatography on silica gel (petroleum ether/ EtOAc = 5:1 to 2:1) to afford chiral product **3ia** as white solid (67.5 mg, yield: 95%), mp 103–104 °C.

Enantiomeric excess was determined by HPLC analysis,  $ee$  = 97%, Chiralpak column IA,  $\lambda$  = 254 nm,  $n$ -hexane/ $i$ -PrOH = 70:30, flow rate: 1.0 mL/min, 30 °C,  $t_r$ (major) = 20.275 min,  $t_r$ (minor) = 26.743 min;

$[\alpha]_D^{25} = -59.9^\circ$  ( $c$  = 0.2,  $\text{CHCl}_3$ );

IR (KBr)  $\nu_{\text{max}}$ : 2924, 2853, 2225, 1692, 1659, 1609. 1595, 1578, 1512, 1448, 1416, 1398, 1346, 1327, 1310, 1290, 1275, 1220, 1178, 1153  $\text{cm}^{-1}$ ;

$^1\text{H}$  NMR (400 MHz,  $\text{CDCl}_3$ ):  $\delta$  = 8.00 (d,  $J$  = 7.5 Hz, 2H), 7.63 (d,  $J$  = 8.0 Hz, 2H), 7.53 (t,  $J$  = 7.4 Hz, 1H), 7.46 – 7.37 (m, 4H), 7.18 (s, 1H), 7.03 (s, 1H), 4.20 (dd,  $J$  = 9.7, 6.1 Hz, 1H), 3.89 (s, 3H), 3.61 (t,  $J$  = 6.3 Hz, 1H), 3.39 (dd,  $J$  = 9.8, 6.5 Hz, 1H);  
 $^{13}\text{C}$  NMR (101 MHz,  $\text{CDCl}_3$ ):  $\delta$  = 193.20, 184.83, 144.21, 142.96, 136.67, 133.44, 132.52, 129.21, 128.63, 128.50, 127.50, 127.35, 118.73, 110.81, 38.53, 36.48, 36.16, 29.96;

HRMS (ESI,  $m/z$ ) calcd. for  $\text{C}_{22}\text{H}_{17}\text{N}_3\text{O}_2\text{Na}^+$  [ $\text{M}+\text{Na}$ ] $^+$ : 378.1219, found: 378.1213.

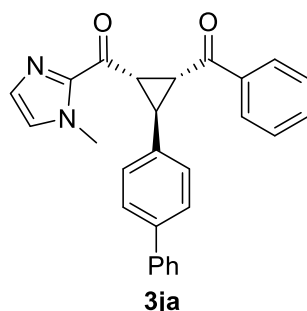

A dried 25 mL Schlenk tube was charged with  $\alpha,\beta$ -unsaturated 2-acylimidazole **1j** (57.7 mg, 0.20 mmol), sulfoxonium ylide **2a** (47.1 mg, 0.24 mmol) and chiral catalyst  **$\Lambda$ -Rh3** (0.83 mg, 0.5 mol %). The tube was purged with argon, then DCE (0.6 mL) was added. The reaction mixture was stirred at 30°C for indicated time (monitored by TLC) under argon. After cooling to room temperature, the mixture was purified by flash column chromatography on silica gel (petroleum ether/ EtOAc = 10:1 to 4:1) to afford chiral product **3ja** as pale yellow oil (78.8 mg, yield: 97%).

Enantiomeric excess was determined by HPLC analysis,  $ee$  = 98%, Chiralpak column AS-H,  $\lambda$  = 254 nm,  $n$ -hexane/ $i$ -PrOH = 80:20, flow rate: 1.0 mL/min, 30 °C,  $t_r$ (minor) = 14.026 min,  $t_r$ (major) = 16.803 min;

$[\alpha]_D^{25}$  = -71.3° ( $c$  = 0.1,  $\text{CHCl}_3$ );

IR (KBr)  $\nu_{\text{max}}$ : 3060, 3027, 2285, 1682, 1656, 1597, 1579, 1488, 1445, 1404, 1341, 1287, 1218, 1176, 1155  $\text{cm}^{-1}$ ;



$^1\text{H}$  NMR (400 MHz,  $\text{CDCl}_3$ ):  $\delta$  = 8.04 (d,  $J$  = 7.3 Hz, 2H), 7.62 – 7.50 (m, 5H), 7.47 – 7.32 (m, 7H), 7.16 (s, 1H), 7.00 (s, 1H), 4.20 – 4.13 (dd,  $J$  = 9.6, 6.1 Hz, 1H), 3.91 (s, 3H), 3.62 (t,  $J$  = 6.3 Hz, 1H), 3.38 (dd,  $J$  = 9.6, 6.6 Hz, 1H);

$^{13}\text{C}$  NMR (101 MHz,  $\text{CDCl}_3$ ):  $\delta$  = 193.96, 185.94, 143.52, 140.68, 139.99, 137.64, 137.06, 133.17, 129.43, 128.83, 128.55, 128.54, 127.41, 127.33, 127.13, 127.03, 38.56, 36.31, 36.10, 30.42 (one aryl peak lost for overlap);

HRMS (ESI,  $m/z$ ) calcd. for  $\text{C}_{27}\text{H}_{22}\text{N}_2\text{O}_2\text{Na}^+$  [ $\text{M}+\text{Na}$ ] $^+$ : 429.1579, found: 429.1574.

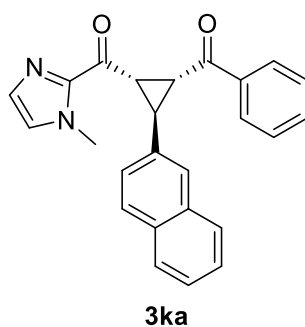

A dried 25 mL Schlenk tube was charged with  $\alpha,\beta$ -unsaturated 2-acylimidazole **1k** (52.5 mg, 0.20 mmol), sulfoxonium ylide **2a** (47.1 mg, 0.24 mmol) and chiral catalyst  $\Lambda$ -**Rh3** (0.83 mg, 0.5 mol %). The tube was purged with argon, then DCE (0.6 mL) was added. The reaction mixture was stirred at 30°C for indicated time (monitored by TLC) under argon. After cooling to room temperature, the mixture was purified by flash column chromatography on silica gel (petroleum ether/ EtOAc = 10:1 to 4:1) to afford chiral product **3ka** as white solid (73.9 mg, yield: 97%), mp 139–140 °C.

Enantiomeric excess was determined by HPLC analysis,  $ee$  = 99%, Chiralpak column AS-H,  $\lambda$  = 254 nm,  $n$ -hexane/ $i$ -PrOH = 85:10, flow rate: 1.0 mL/min, 30 °C,  $t_r$ (minor) = 13.706 min,  $t_r$ (major) = 16.806 min;

$[\alpha]_{\text{D}}^{25}$  = -67.7° ( $c$  = 0.1,  $\text{CHCl}_3$ );

IR (KBr)  $\nu_{\text{max}}$ : 2920, 2852, 1685, 1661, 1598, 1510, 1468, 1451, 1429, 1404, 1285, 1222  $\text{cm}^{-1}$ ;

$^1\text{H}$  NMR (400 MHz,  $\text{CDCl}_3$ ):  $\delta$  = 8.07 – 8.01 (m, 2H), 7.85 – 7.75 (m, 4H), 7.54 – 7.37 (m, 6H), 7.16 (s, 1H), 7.00 (s, 1H), 4.25 (dd,  $J$  = 9.6, 6.0 Hz, 1H), 3.91 (s, 3H), 3.74 (t,  $J$  = 6.3 Hz, 1H), 3.45 (dd,  $J$  = 9.6, 6.6 Hz, 1H);

$^{13}\text{C}$  NMR (101 MHz,  $\text{CDCl}_3$ ):  $\delta$  = 193.91, 185.93, 143.51, 137.01, 135.93, 133.39, 133.15, 132.52, 129.40, 128.52 (overlap, 4C), 128.45, 127.67, 127.57, 127.09, 126.36, 125.74, 125.32, 124.85, 38.72, 36.16, 36.10, 30.76;

HRMS (ESI,  $m/z$ ) calcd. for  $\text{C}_{25}\text{H}_{20}\text{N}_2\text{O}_2\text{Na}^+$  [ $\text{M}+\text{Na}$ ] $^+$ : 403.1423, found: 403.1417.

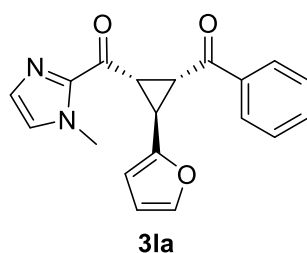

A dried 25 mL Schlenk tube was charged with  $\alpha,\beta$ -unsaturated 2-acylimidazole **11** (40.4 mg, 0.20 mmol), sulfoxonium ylide **2a** (47.1 mg, 0.24 mmol) and chiral catalyst  **$\Lambda$ -Rh3** (3.4 mg, 2.0 mol %). The tube was purged with argon, then DCE (0.6 mL) was added. The reaction mixture was stirred at 30°C for indicated time (monitored by TLC) under argon. After cooling to room temperature, the mixture was purified by flash column chromatography on silica gel (petroleum ether/ EtOAc = 10:1 to 4:1) to afford chiral product **3la** as pale yellow oil (52.7 mg, yield: 82%).

Enantiomeric excess was determined by HPLC analysis,  $ee$  = 99%, Chiralpak column ID,  $\lambda$  = 254 nm,  $n$ -hexane/ $i$ -PrOH = 75:25, flow rate: 1.0 mL/min, 30 °C,  $t_r$ (minor) = 25.252 min,  $t_r$ (major) = 28.334 min;

$[\alpha]_D^{25}$  = -170.3° ( $c$  = 0.2,  $\text{CHCl}_3$ );

IR (KBr)  $\nu_{\text{max}}$ : 3435, 3138, 3070, 3029, 2922, 1675, 1657, 1597, 1510, 1453, 1423, 1401, 1287, 1249, 1224, 1178, 1152  $\text{cm}^{-1}$ ;

$^1\text{H}$  NMR (400 MHz,  $\text{CDCl}_3$ ):  $\delta$  = 8.06 – 7.97 (m, 2H), 7.51 (td,  $J$  = 7.2, 1.4 Hz, 1H), 7.40 (t,  $J$  = 7.8 Hz, 2H), 7.31 (d,  $J$  = 1.8 Hz, 1H), 7.15 (s, 1H), 6.99 (s, 1H), 6.35 –

6.30 (m, 1H), 6.26 (d,  $J = 3.2$  Hz, 1H), 4.18 (dd,  $J = 9.7, 5.9$  Hz, 1H), 3.87 (s, 3H), 3.57 (t,  $J = 6.2$  Hz, 1H), 3.47 (dd,  $J = 9.7, 6.5$  Hz, 1H);

$^{13}\text{C}$  NMR (101 MHz,  $\text{CDCl}_3$ ):  $\delta = 193.49, 185.49, 151.71, 143.41, 141.46, 136.89, 133.19, 129.47, 128.55, 128.52, 127.12, 110.70, 106.59, 36.22, 36.07, 34.45, 23.97$ ;

HRMS (ESI,  $m/z$ ) calcd. for  $\text{C}_{19}\text{H}_{16}\text{N}_2\text{O}_3\text{Na}^+$   $[\text{M}+\text{Na}]^+$ : 343.1059, found: 343.1053.

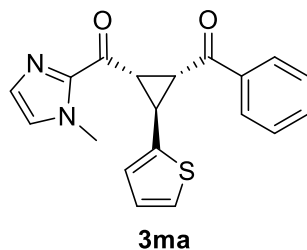

A dried 25 mL Schlenk tube was charged with  $\alpha,\beta$ -unsaturated 2-acylimidazole **1m** (43.7 mg, 0.20 mmol), sulfoxonium ylide **2a** (47.1 mg, 0.24 mmol) and chiral catalyst  $\Lambda$ -**Rh3** (3.4 mg, 2.0 mol %). The tube was purged with argon, then DCE (0.6 mL) was added. The reaction mixture was stirred at 30°C for indicated time (monitored by TLC) under argon. After cooling to room temperature, the mixture was purified by flash column chromatography on silica gel (petroleum ether/ EtOAc = 10:1 to 4:1) to afford chiral product **3ma** as pale yellow oil (63.3 mg, yield: 94%).

Enantiomeric excess was determined by HPLC analysis,  $ee = 98\%$ , Chiralpak column OD-H,  $\lambda = 254$  nm,  $n$ -hexane/ $i$ -PrOH = 90:10, flow rate: 1.0 mL/min, 30 °C,  $t_r(\text{minor}) = 11.247$  min,  $t_r(\text{major}) = 15.682$  min;

$[\alpha]_D^{25} = -235.9^\circ$  ( $c = 0.3, \text{CHCl}_3$ );

IR (KBr)  $\nu_{\text{max}}$ : 3271, 2944, 1703, 1667, 1604, 1527, 1442, 1430, 1407, 1391, 1373, 1352, 1277, 1204, 1157  $\text{cm}^{-1}$ ;

$^1\text{H}$  NMR (400 MHz,  $\text{CDCl}_3$ ):  $\delta = 8.04 - 8.00$  (m, 2H), 7.55 - 7.48 (m, 1H), 7.41 (t,  $J = 7.7$  Hz, 2H), 7.18 - 7.14 (m, 2H), 7.02 - 6.98 (m, 2H), 6.96 (dd,  $J = 5.1, 3.5$  Hz, 1H), 4.10 (dd,  $J = 9.7, 5.9$  Hz, 1H), 3.89 (s, 3H), 3.74 (t, 1H,  $J = 6.2$  Hz), 3.37 (dd,  $J = 9.7, 6.5$  Hz, 1H);

$^{13}\text{C}$  NMR (101 MHz,  $\text{CDCl}_3$ ):  $\delta = 193.45, 185.34, 143.34, 142.41, 136.86, 133.22, 129.43, 128.53$  (overlap, 4C),  $127.11$  (overlap, 2C),  $124.70, 123.75, 39.38, 37.29, 36.08, 25.93$ ;

HRMS (ESI,  $m/z$ ) calcd. for  $\text{C}_{19}\text{H}_{16}\text{N}_2\text{O}_2\text{SNa}^+$   $[\text{M}+\text{Na}]^+$ : 359.0830, found: 359.0830.

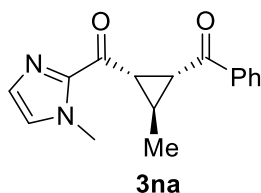

A dried 25 mL Schlenk tube was charged with  $\alpha,\beta$ -unsaturated 2-acylimidazole **1n** (30.1 mg, 0.20 mmol), sulfoxonium ylide **2a** (47.1 mg, 0.24 mmol) and chiral catalyst  **$\Lambda$ -Rh3** (3.4 mg, 2.0 mol %). The tube was purged with argon, then DCE (0.6 mL) was added. The reaction mixture was stirred at  $30^\circ\text{C}$  for indicated time (monitored by TLC) under argon. After cooling to room temperature, the mixture was purified by flash column chromatography on silica gel (petroleum ether/ EtOAc = 10:1 to 4:1) to afford chiral product **3na** as colorless oil (45.6 mg, yield: 85%).

Enantiomeric excess was determined by HPLC analysis,  $ee = 99\%$ , Chiralpak column ID,  $\lambda = 254$  nm,  $n$ -hexane/ $i$ -PrOH = 75:25, flow rate: 1.0 mL/min,  $30^\circ\text{C}$ ,  $t_r(\text{major}) = 14.494$  min,  $t_r(\text{minor}) = 17.270$  min;

$[\alpha]_{\text{D}}^{25} = +74.2^\circ$  ( $c = 0.1$ ,  $\text{CHCl}_3$ );

IR (KBr)  $\nu_{\text{max}}$ : 2979, 1681, 1595, 1571, 1549, 1511, 1464, 1456, 1412, 1383, 1339, 1278, 1220, 1189, 1167,  $1072\text{ cm}^{-1}$ ;

$^1\text{H}$  NMR (400 MHz,  $\text{CDCl}_3$ ):  $\delta = 8.07 - 8.01$  (m, 2H),  $7.60 - 7.54$  (m, 1H),  $7.51 - 7.44$  (m, 2H),  $7.24 - 7.18$  (m, 1H),  $7.07$  (s, 1H),  $4.09$  (dd,  $J = 5.7, 4.6$  Hz, 1H),  $3.99$  (s, 3H),  $3.45$  (dd,  $J = 9.7, 4.7$  Hz, 1H),  $2.26$  (dp,  $J = 9.7, 6.2$  Hz, 1H),  $1.26$  (d,  $J = 6.2$  Hz, 3H);

$^{13}\text{C}$  NMR (101 MHz,  $\text{CDCl}_3$ ):  $\delta = 195.47, 189.60, 143.29, 138.02, 133.02, 129.81, 128.59, 128.26, 127.29, 36.16, 35.36, 32.99, 29.56, 11.30$ ;

HRMS (ESI,  $m/z$ ) calcd. for  $C_{16}H_{16}N_2O_2Na^+$   $[M+Na]^+$ : 291.1109, found: 291.1102.

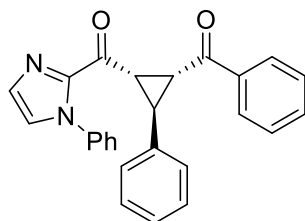

**30a**

A dried 25 mL Schlenk tube was charged with  $\alpha,\beta$ -unsaturated 2-acylimidazole **1o** (54.9 mg, 0.20 mmol), sulfoxonium ylide **2a** (47.1 mg, 0.24 mmol) and chiral catalyst  **$\Lambda$ -Rh3** (0.83 mg, 0.5 mol %). The tube was purged with argon, then DCE (0.6 mL) was added. The reaction mixture was stirred at 30°C for indicated time (monitored by TLC) under argon. After cooling to room temperature, the mixture was purified by flash column chromatography on silica gel (petroleum ether/ EtOAc = 10:1 to 4:1) to afford chiral product **30a** as pale yellow oil (76.9 mg, yield: 98%).

Enantiomeric excess was determined by HPLC analysis,  $ee = 99\%$ , Chiralpak column IB,  $\lambda = 254$  nm,  $n$ -hexane/ $i$ -PrOH = 90:10, flow rate: 1.0 mL/min, 30 °C,  $t_r$ (minor) = 11.333 min,  $t_r$ (major) = 15.550 min;

$[\alpha]_D^{25} = +21.9^\circ$  ( $c = 0.1$ ,  $CHCl_3$ );

IR (KBr)  $\nu_{max}$ : 3453, 2922, 1677, 1596, 1580, 1503, 1497, 1445, 1429, 1399, 1310, 1274, 1217  $cm^{-1}$ ;

$^1H$  NMR (400 MHz,  $CDCl_3$ ):  $\delta = 8.02 - 7.97$  (m, 2H), 7.54 – 7.48 (m, 1H), 7.43 – 7.21 (m, 11H), 7.15 – 7.08 (m, 3H), 4.07 (dd,  $J = 9.6, 6.1$  Hz, 1H), 3.46 (t,  $J = 6.3$  Hz, 1H), 3.37 (dd,  $J = 9.5, 6.5$  Hz, 1H);

$^{13}C$  NMR (101 MHz,  $CDCl_3$ ):  $\delta = 193.84, 184.56, 143.28, 138.46, 137.99, 136.96, 133.12, 129.80, 128.87, 128.66, 128.54, 128.50, 128.46, 127.02, 126.98, 126.58, 125.62, 38.58, 36.00, 30.40$ ;

HRMS (ESI,  $m/z$ ) calcd. for  $C_{26}H_{20}N_2O_2Na^+$   $[M+Na]^+$ : 415.1422, found: 415.1417.

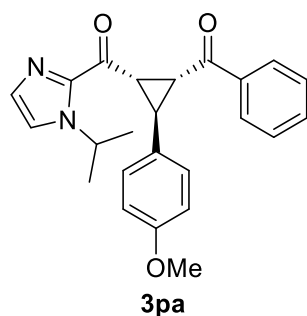

A dried 25 mL Schlenk tube was charged with  $\alpha,\beta$ -unsaturated 2-acylimidazole **1p** (54.1 mg, 0.20 mmol), sulfoxonium ylide **2a** (47.1 mg, 0.24 mmol) and chiral catalyst  **$\Lambda$ -Rh3** (0.83 mg, 0.5 mol %). The tube was purged with argon, then DCE (0.6 mL) was added. The reaction mixture was stirred at 30°C for indicated time (monitored by TLC) under argon. After cooling to room temperature, the mixture was purified by flash column chromatography on silica gel (petroleum ether/ EtOAc = 10:1 to 4:1) to afford chiral product **3pa** as colorless oil (62.4 mg, yield: 80%).

Enantiomeric excess was determined by HPLC analysis,  $ee > 99\%$ , Chiralpak column IA,  $\lambda = 254$  nm,  $n$ -hexane/ $i$ -PrOH = 80:20, flow rate: 1.0 mL/min, 30 °C,  $t_r$ (major) = 15.107 min,  $t_r$ (minor) = 23.330 min;

$[\alpha]_D^{25} = -49.2^\circ$  ( $c = 0.1$ ,  $\text{CHCl}_3$ );

IR (KBr)  $\nu_{\text{max}}$ : 3439, 2935, 1687, 1659, 1613, 1597, 1580, 1517, 1450, 1414, 1394, 1306, 1279, 1250, 1217, 1197, 1176  $\text{cm}^{-1}$ ;

$^1\text{H}$  NMR (400 MHz,  $\text{CDCl}_3$ ):  $\delta = 8.01$  (dd,  $J = 8.1, 1.5$  Hz, 2H), 7.52 – 7.45 (m, 1H), 7.37 (t,  $J = 7.6$  Hz, 2H), 7.30 – 7.20 (m, 3H), 7.18 (s, 1H), 6.90 – 6.84 (m, 2H), 5.42 (m,  $J = 6.7$  Hz, 1H), 4.14 (dd,  $J = 9.6, 6.0$  Hz, 1H), 3.80 (s, 3H), 3.53 (t,  $J = 6.3$  Hz, 1H), 3.26 (dd,  $J = 9.6, 6.6$  Hz, 1H), 1.37 (d,  $J = 6.7$  Hz, 3H), 1.21 (d,  $J = 6.6$  Hz, 3H);

$^{13}\text{C}$  NMR (101 MHz,  $\text{CDCl}_3$ ):  $\delta = 194.18, 186.16, 158.67, 142.82, 137.08, 133.03, 130.59, 129.79, 128.48, 128.45, 127.87, 121.22, 114.08, 55.34, 49.17, 38.50, 36.60, 30.02, 23.45, 23.40$ ;

HRMS (ESI,  $m/z$ ) calcd. for  $\text{C}_{24}\text{H}_{24}\text{N}_2\text{O}_3\text{Na}^+$   $[\text{M}+\text{Na}]^+$ : 411.1685, found: 411.1682.

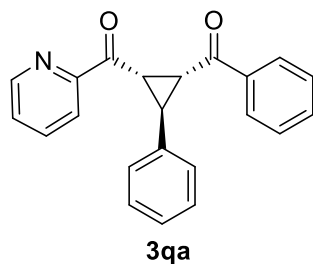

A dried 25 mL Schlenk tube was charged with **1q** (41.9 mg, 0.20 mmol), sulfoxonium ylide **2a** (47.1 mg, 0.24 mmol) and chiral catalyst **A-Rh3** (3.4 mg, 2.0 mol %). The tube was purged with argon, then DCE (0.6 mL) was added. The reaction mixture was stirred at 30°C for indicated time (monitored by TLC) under argon. After cooling to room temperature, the mixture was purified by flash column chromatography on silica gel (petroleum ether/ EtOAc = 10:1 to 4:1) to afford chiral product **3qa** as white solid (49.4 mg, yield: 75%), mp 93–94 °C.

Enantiomeric excess was determined by HPLC analysis, *ee* = 98%, Chiralpak column AS-H,  $\lambda$  = 254 nm, *n*-hexane/*i*-PrOH = 90:10, flow rate: 1.0 mL/min, 30 °C,  $t_r$ (minor) = 15.938 min,  $t_r$ (major) = 20.009 min;

$[\alpha]_D^{25} = -143.8^\circ$  ( $c = 0.3$ , CHCl<sub>3</sub>);

IR (KBr)  $\nu_{\max}$ : 3014, 1702, 1649, 1588, 1521, 1469, 1456, 1432, 1417, 1396, 1378, 1335, 1270, 1219, 1165, 1154 cm<sup>-1</sup>;

<sup>1</sup>H NMR (400 MHz, CDCl<sub>3</sub>):  $\delta$  = 8.72 (d,  $J = 4.6$  Hz, 1H), 8.06 (d,  $J = 7.7$  Hz, 1H), 7.99 (d,  $J = 7.7$  Hz, 2H), 7.87 (t,  $J = 7.6$  Hz, 1H), 7.55 – 7.45 (m, 2H), 7.43 – 7.32 (m, 6H), 7.31 – 7.26 (m, 1H), 4.27 (dd,  $J = 9.5, 6.2$  Hz, 1H), 3.60 (t,  $J = 6.2$  Hz, 1H), 3.48 (dd,  $J = 9.4, 6.5$  Hz, 1H);

<sup>13</sup>C NMR (101 MHz, CDCl<sub>3</sub>):  $\delta$  = 194.81, 194.18, 152.53, 148.19, 138.55, 137.91, 136.83, 133.18, 128.73, 128.52, 128.50, 127.38, 127.07, 126.70, 122.56, 39.19, 34.86, 31.34;

HRMS (ESI,  $m/z$ ) calcd. for C<sub>22</sub>H<sub>17</sub>NO<sub>2</sub>Na<sup>+</sup> [M+Na]<sup>+</sup>: 350.1157, found: 350.1151.

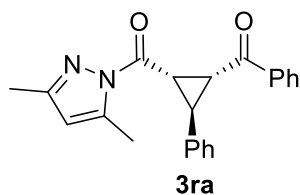

A dried 25 mL Schlenk tube was charged with  $\alpha,\beta$ -unsaturated *N*-acylpyrazole **1r** (45.3 mg, 0.20 mmol), sulfoxonium ylide **2a** (47.1 mg, 0.24 mmol) and chiral catalyst **A-Rh3** (3.4 mg, 2.0 mol %). The tube was purged with argon, then DCE (0.6 mL) was added. The reaction mixture was stirred at 50°C for indicated time (monitored by TLC) under argon. After cooling to room temperature, the mixture was purified by flash column chromatography on silica gel (petroleum ether/ EtOAc = 10:1 to 4:1) to afford chiral product **3ra** as white solid (58.0 mg, yield: 84%), mp 103–104 °C.

Enantiomeric excess was determined by HPLC analysis, *ee* = 97%, Chiralpak column AS-H,  $\lambda$  = 254 nm, *n*-hexane/*i*-PrOH = 85:15, flow rate: 1.0 mL/min, 30 °C,  $t_r$ (minor) = 6.441 min,  $t_r$ (major) = 7.280 min;

$[\alpha]_D^{25} = +48.4^\circ$  ( $c = 0.1$ , CHCl<sub>3</sub>);

IR (KBr)  $\nu_{\max}$ : 2947, 1687, 1664, 1572, 1483, 1403, 1336, 1290, 1203, 1028 cm<sup>-1</sup>;

<sup>1</sup>H NMR (400 MHz, CDCl<sub>3</sub>):  $\delta$  = 8.01 (d,  $J = 7.1$  Hz, 2H), 7.53 (t,  $J = 7.4$  Hz, 1H), 7.41 (t,  $J = 7.7$  Hz, 2H), 7.38 – 7.30 (m, 4H), 7.30 – 7.24 (m, 1H), 5.91 (s, 1H), 3.90 (dd,  $J = 9.6, 6.3$  Hz, 1H), 3.56 (t,  $J = 6.3$  Hz, 1H), 3.37 (dd,  $J = 9.6, 6.4$  Hz, 1H), 2.46 (s, 3H), 2.19 (s, 3H);

<sup>13</sup>C NMR (101 MHz, CDCl<sub>3</sub>):  $\delta$  = 194.22, 168.41, 152.21, 144.19, 138.17, 137.04, 133.13, 128.68, 128.49, 128.46, 127.11, 126.79, 111.09, 37.02, 32.86, 30.63, 14.35, 13.79;

HRMS (ESI,  $m/z$ ) calculated for C<sub>22</sub>H<sub>21</sub>N<sub>2</sub>O<sub>2</sub><sup>+</sup> [M+H]<sup>+</sup>: 345.1603, found: 345.1602.

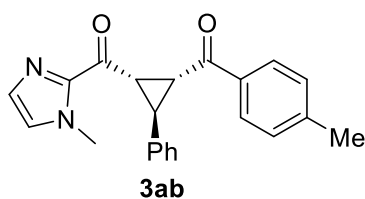



A dried 25 mL Schlenk tube was charged with **1a** (42.6 mg, 0.20 mmol), sulfoxonium ylide **2b** (50.4 mg, 0.24 mmol) and chiral catalyst  **$\Lambda$ -Rh3** (0.83 mg, 0.5 mol %). The tube was purged with argon, then DCE (0.6 mL) was added. The reaction mixture was stirred at 30°C for indicated time (monitored by TLC) under argon. After cooling to room temperature, the mixture was purified by flash column chromatography on silica gel (petroleum ether/ EtOAc = 5:1 to 2:1) to afford chiral product **3ab** as white solid (66.8 mg, yield: 97%), mp 137–138 °C.

Enantiomeric excess was determined by HPLC analysis, *ee* = 99%, Chiralpak column ID,  $\lambda$  = 254 nm, *n*-hexane/*i*-PrOH = 70:30, flow rate: 1.0 mL/min, 30 °C,  $t_r$ (minor) = 25.149 min,  $t_r$ (major) = 28.060 min;

$[\alpha]_D^{25}$  = -141.7° (*c* = 0.1, CHCl<sub>3</sub>);

IR (KBr)  $\nu_{\max}$ : 2992, 1929, 1817, 1774, 1679, 1660, 1605, 1573, 1504, 1461, 1402, 1349, 1323, 1309, 1276, 1228, 1211, 1176, 1157 cm<sup>-1</sup>;

<sup>1</sup>H NMR (400 MHz, CDCl<sub>3</sub>):  $\delta$  = 7.94 – 7.88 (m, 2H), 7.36 – 7.29 (m, 4H), 7.27 – 7.22 (m, 1H), 7.21 – 7.13 (m, 3H), 7.00 (s, 1H), 4.12 (dd, *J* = 9.6, 6.0 Hz, 1H), 3.91 (s, 3H), 3.55 (t, *J* = 6.2 Hz, 1H), 3.35 (dd, *J* = 9.5, 6.6 Hz, 1H), 2.36 (s, 3H);

<sup>13</sup>C NMR (101 MHz, CDCl<sub>3</sub>):  $\delta$  = 193.57, 185.92, 144.00, 143.28, 138.54, 134.54, 129.22, 128.94, 128.69, 128.66, 127.00, 126.97, 126.70, 38.72, 36.17, 36.15, 30.61, 21.69;

HRMS (ESI, *m/z*) calcd. for C<sub>22</sub>H<sub>20</sub>N<sub>2</sub>O<sub>2</sub>Na<sup>+</sup> [M+Na]<sup>+</sup>: 367.1423, found: 367.1417.

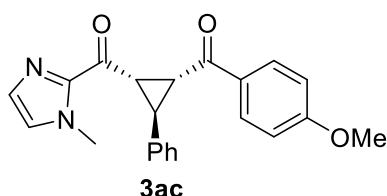

A dried 25 mL Schlenk tube was charged with **1a** (42.6 mg, 0.20 mmol), sulfoxonium ylide **2c** (54.3 mg, 0.24 mmol) and chiral catalyst  **$\Lambda$ -Rh3** (0.83 mg, 0.5 mol %). The tube was purged with argon, then DCE (0.6 mL) was added. The reaction mixture was stirred at 30°C for indicated time (monitored by TLC) under argon. After cooling to

room temperature, the mixture was purified by flash column chromatography on silica gel (petroleum ether/ EtOAc = 5:1 to 2:1) to afford chiral product **3ac** as colorless oil (66.1 mg, yield: 92%).

Enantiomeric excess was determined by HPLC analysis, *ee* > 99%, Chiralpak column OD-H,  $\lambda = 254$  nm, *n*-hexane/*i*-PrOH = 85:15, flow rate: 1.0 mL/min, 30 °C,  $t_r(\text{minor}) = 17.359$  min,  $t_r(\text{major}) = 18.314$  min;

$[\alpha]_D^{25} = -83.1^\circ$  ( $c = 0.2$ ,  $\text{CHCl}_3$ );

IR (KBr)  $\nu_{\text{max}}$ : 2923, 1677, 1654, 1598, 1510, 1462, 1431, 1400, 1343, 1313, 1281, 1261, 1227, 1162  $\text{cm}^{-1}$ ;

$^1\text{H}$  NMR (400 MHz,  $\text{CDCl}_3$ ):  $\delta = 8.02 - 7.96$  (m, 2H), 7.35 – 7.27 (m, 4H), 7.23 (ddd,  $J = 8.5, 5.4, 2.1$  Hz, 1H), 7.13 (d,  $J = 1.0$  Hz, 1H), 6.98 (d,  $J = 0.9$  Hz, 1H), 6.87 – 6.82 (m, 2H), 4.08 (dd,  $J = 9.6, 6.0$  Hz, 1H), 3.88 (s, 3H), 3.80 (s, 3H), 3.55 (t,  $J = 6.3$  Hz, 1H), 3.30 (dd,  $J = 9.6, 6.6$  Hz, 1H);

$^{13}\text{C}$  NMR (101 MHz,  $\text{CDCl}_3$ ):  $\delta = 192.27, 186.09, 163.49, 143.51, 138.63, 130.77, 130.10, 129.27, 128.63, 127.01, 126.93, 126.64, 113.63, 55.42, 38.50, 36.07, 35.91, 30.41$ ;

HRMS (ESI,  $m/z$ ) calcd. for  $\text{C}_{22}\text{H}_{20}\text{N}_2\text{O}_2\text{Na}^+$   $[\text{M}+\text{Na}]^+$ : 383.1372, found: 383.1366.

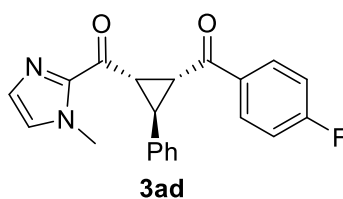

A dried 25 mL Schlenk tube was charged with **1a** (42.6 mg, 0.20 mmol), sulfoxonium ylide **2d** (51.4 mg, 0.24 mmol) and chiral catalyst **A-Rh3** (0.83 mg, 0.5 mol %). The tube was purged with argon, then DCE (0.6 mL) was added. The reaction mixture was stirred at 30°C for indicated time (monitored by TLC) under argon. After cooling to room temperature, the mixture was purified by flash column chromatography on silica gel (petroleum ether/ EtOAc = 5:1 to 2:1) to afford chiral product **3ad** as colorless oil (67.9 mg, yield: 97%).

Enantiomeric excess was determined by HPLC analysis, *ee* = 99%, Chiralpak column OD-H,  $\lambda$  = 254 nm, *n*-hexane/*i*-PrOH = 85:15, flow rate: 1.0 mL/min, 30 °C,  $t_r$ (minor) = 9.872 min,  $t_r$ (major) = 11.403 min;

$[\alpha]_D^{25} = +45.5^\circ$  ( $c = 0.1$ ,  $\text{CHCl}_3$ );

IR (KBr)  $\nu_{\text{max}}$ : 2921, 1683, 1647, 1589, 1504, 1458, 1430, 1401, 1350, 1323, 1278, 1224, 1154  $\text{cm}^{-1}$ ;

$^1\text{H}$  NMR (400 MHz,  $\text{CDCl}_3$ ):  $\delta$  = 8.08 – 8.01 (m, 2H), 7.36 – 7.23 (m, 5H), 7.15 (d,  $J$  = 0.9 Hz, 1H), 7.09 – 7.02 (m, 2H), 7.00 (s, 1H), 4.13 (dd,  $J$  = 9.6, 6.0 Hz, 1H), 3.89 (s, 3H), 3.56 (t,  $J$  = 6.3 Hz, 1H), 3.28 (dd,  $J$  = 9.6, 6.6 Hz, 1H);

$^{13}\text{C}$  NMR (101 MHz,  $\text{CDCl}_3$ ):  $\delta$  = 192.40, 185.88, 165.75 (d,  $J$  = 254.7 Hz, 1C), 143.44, 138.33, 133.49 (d,  $J$  = 3.0 Hz, 1C), 131.14 (d,  $J$  = 9.4 Hz, 2C), 129.46, 128.72, 127.19, 127.10, 126.68, 115.64 (d,  $J$  = 21.9 Hz, 2C), 38.33, 36.10 (overlap, 2C), 30.55;

$^{19}\text{F}$  NMR (376 MHz,  $\text{CDCl}_3$ )  $\delta$  = -105.00;

HRMS (ESI,  $m/z$ ) calcd. for  $\text{C}_{21}\text{H}_{17}\text{FN}_2\text{O}_2\text{Na}^+$  [ $\text{M}+\text{Na}$ ] $^+$ : 371.1172, found: 371.1166.

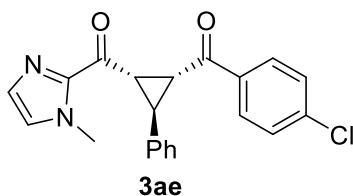

A dried 25 mL Schlenk tube was charged with **1a** (42.6 mg, 0.20 mmol), sulfoxonium ylide **2e** (55.5 mg, 0.24 mmol) and chiral catalyst **A-Rh3** (0.83 mg, 0.5 mol %). The tube was purged with argon, then DCE (0.6 mL) was added. The reaction mixture was stirred at 30°C for indicated time (monitored by TLC) under argon. After cooling to room temperature, the mixture was purified by flash column chromatography on silica gel (petroleum ether/ EtOAc = 5:1 to 2:1) to afford chiral product **3ae** as white solid (64.2 mg, yield: 88%), mp 119–120 °C.

Enantiomeric excess was determined by HPLC analysis,  $ee = 98\%$ , Chiralpak column IA,  $\lambda = 254$  nm,  $n$ -hexane/ $i$ -PrOH = 75:25, flow rate: 1.0 mL/min, 30 °C,  $t_r(\text{minor}) = 14.628$  min,  $t_r(\text{major}) = 17.342$  min;  
 $[\alpha]_D^{25} = +31.9^\circ$  ( $c = 0.1$ ,  $\text{CHCl}_3$ );  
IR (KBr)  $\nu_{\text{max}}$ : 3061, 1673, 1659, 1587, 1570, 1502, 1432, 1408, 1337, 1323, 1303, 1281, 1217, 1171, 1156, 1087  $\text{cm}^{-1}$ ;  
 $^1\text{H}$  NMR (400 MHz,  $\text{CDCl}_3$ ):  $\delta = 7.99 - 7.94$  (m, 2H), 7.39 – 7.23 (m, 7H), 7.15 (s, 1H), 7.01 (s, 1H), 4.14 (dd,  $J = 9.6, 6.0$  Hz, 1H), 3.89 (d,  $J = 2.6$  Hz, 3H), 3.56 (t,  $J = 6.3$  Hz, 1H), 3.27 (dd,  $J = 9.6, 6.6$  Hz, 1H);  
 $^{13}\text{C}$  NMR (101 MHz,  $\text{CDCl}_3$ ):  $\delta = 192.83, 185.80, 143.39, 139.57, 138.25, 135.38, 129.90, 129.49, 128.85, 128.73, 127.22, 127.13, 126.69, 38.26, 36.19, 36.11, 30.59$ ;  
HRMS (ESI,  $m/z$ ) calcd. for  $\text{C}_{21}\text{H}_{17}\text{ClN}_2\text{O}_2\text{Na}^+$   $[\text{M}+\text{Na}]^+$ : 387.0877, found: 387.0871.

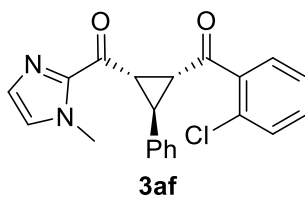

A dried 25 mL Schlenk tube was charged with **1a** (42.6 mg, 0.20 mmol), sulfoxonium ylide **2f** (55.5 mg, 0.24 mmol) and chiral catalyst  $\Lambda$ -**Rh3** (3.4 mg, 2.0 mol %). The tube was purged with argon, then DCE (0.6 mL) was added. The reaction mixture was stirred at 30°C for indicated time (monitored by TLC) under argon. After cooling to room temperature, the mixture was purified by flash column chromatography on silica gel (petroleum ether/ EtOAc = 5:1 to 2:1) to afford chiral product **3af** as colorless oil (54.1 mg, yield: 74%).

Enantiomeric excess was determined by HPLC analysis,  $ee = 99\%$ , Chiralpak column IC,  $\lambda = 254$  nm,  $n$ -hexane/ $i$ -PrOH = 80:20, flow rate: 1.0 mL/min, 30 °C,  $t_r(\text{minor}) = 15.279$  min,  $t_r(\text{major}) = 19.811$  min;  
 $[\alpha]_D^{25} = +57.4^\circ$  ( $c = 0.1$ ,  $\text{CHCl}_3$ );

IR (KBr)  $\nu_{\text{max}}$ : 3132, 3111, 3070, 1684, 1652, 1586, 1502, 1462, 1434, 1400, 1331, 1294, 1273, 1223, 1183, 1157, 1123, 1089, 1074  $\text{cm}^{-1}$ ;

$^1\text{H}$  NMR (400 MHz,  $\text{CDCl}_3$ ):  $\delta$  = 7.60 – 7.55 (m, 1H), 7.38 – 7.21 (m, 8H), 7.14 (s, 1H), 7.03 (s, 1H), 4.03 – 3.93 (m, 4H), 3.57 (t,  $J$  = 6.5 Hz, 1H), 3.35 (dd,  $J$  = 9.5, 6.3 Hz, 1H);

$^{13}\text{C}$  NMR (101 MHz,  $\text{CDCl}_3$ ):  $\delta$  = 196.76, 185.49, 143.44, 138.79, 138.26, 132.01, 131.67, 130.50, 130.19, 129.41, 128.65, 127.08, 127.06, 126.77, 126.65, 40.82, 38.33, 36.15, 32.31;

HRMS (ESI,  $m/z$ ) calcd. for  $\text{C}_{21}\text{H}_{17}\text{ClN}_2\text{O}_2\text{Na}^+$  [ $\text{M}+\text{Na}$ ] $^+$ : 387.0877, found: 387.0871.

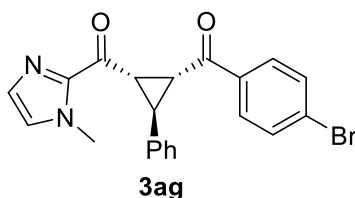

A dried 25 mL Schlenk tube was charged with **1a** (42.6 mg, 0.20 mmol), sulfoxonium ylide **2g** (66.0 mg, 0.24 mmol) and chiral catalyst **A-Rh3** (0.83 mg, 0.5 mol %). The tube was purged with argon, then DCE (0.6 mL) was added. The reaction mixture was stirred at 30°C for indicated time (monitored by TLC) under argon. After cooling to room temperature, the mixture was purified by flash column chromatography on silica gel (petroleum ether/ EtOAc = 5:1 to 2:1) to afford chiral product **3ag** as colorless oil (74.7 mg, yield: 91%).

Enantiomeric excess was determined by HPLC analysis,  $ee > 99\%$ , Chiralpak column AS-H,  $\lambda$  = 254 nm,  $n$ -hexane/ $i$ -PrOH = 85:15, flow rate: 1.0 mL/min, 30 °C,  $t_r$ (minor) = 10.740 min,  $t_r$ (major) = 13.112 min;

$[\alpha]_{\text{D}}^{25}$  = +59.9° ( $c$  = 0.2,  $\text{CHCl}_3$ );

IR (KBr)  $\nu_{\text{max}}$ : 3426, 3055, 1684, 1657, 1603, 1584, 1508, 1502, 1459, 1432, 1403, 1337, 1323, 1308, 1276, 1218, 1171, 1157, 1085, 1069, 1048, 1011  $\text{cm}^{-1}$ ;

$^1\text{H}$  NMR (400 MHz,  $\text{CDCl}_3$ ):  $\delta = 7.92 - 7.85$  (m, 2H), 7.54 (d,  $J = 8.4$  Hz, 2H), 7.37 – 7.23 (m, 5H), 7.16 (s, 1H), 7.01 (s, 1H), 4.14 (dd,  $J = 9.6, 6.1$  Hz, 1H), 3.90 (s, 3H), 3.56 (t,  $J = 6.3$  Hz, 1H), 3.27 (dd,  $J = 9.6, 6.6$  Hz, 1H);

$^{13}\text{C}$  NMR (101 MHz,  $\text{CDCl}_3$ ):  $\delta = 193.16, 185.87, 143.44, 138.32, 135.86, 131.96, 130.12, 129.57, 128.84, 128.47, 127.33, 127.24, 126.79, 38.38, 36.33, 36.26, 30.72$ ;

HRMS (ESI,  $m/z$ ) calcd. for  $\text{C}_{21}\text{H}_{17}\text{BrN}_2\text{O}_2\text{Na}^+ [\text{M}+\text{Na}]^+$ : 431.0371, found: 431.0364.

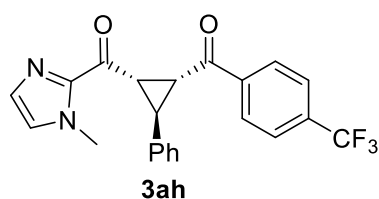

A dried 25 mL Schlenk tube was charged with **1a** (42.6 mg, 0.20 mmol), sulfoxonium ylide **2h** (63.4 mg, 0.24 mmol) and chiral catalyst **A-Rh3** (0.83 mg, 0.5 mol %). The tube was purged with argon, then DCE (0.6 mL) was added. The reaction mixture was stirred at 30°C for indicated time (monitored by TLC) under argon. After cooling to room temperature, the mixture was purified by flash column chromatography on silica gel (petroleum ether/ EtOAc = 5:1 to 2:1) to afford chiral product **3ah** as colorless oil (58.3 mg, yield: 73%).

Enantiomeric excess was determined by HPLC analysis,  $ee = 98\%$ , Chiralpak column OD-H,  $\lambda = 254$  nm,  $n$ -hexane/ $i$ -PrOH = 85:15, flow rate: 1.0 mL/min, 30 °C,  $t_r(\text{minor}) = 9.261$  min,  $t_r(\text{major}) = 12.469$  min;

$[\alpha]_D^{25} = +66.0^\circ$  ( $c = 0.1, \text{CHCl}_3$ );

IR (KBr)  $\nu_{\text{max}}$ : 3105, 2914, 1687, 1663, 1601, 1589, 1508, 1456, 1472, 1394, 1362, 1324, 1297, 1282, 1253, 1230, 1183  $\text{cm}^{-1}$ ;

$^1\text{H}$  NMR (400 MHz,  $\text{CDCl}_3$ ):  $\delta = 8.13$  (d,  $J = 8.1$  Hz, 2H), 7.67 (d,  $J = 8.2$  Hz, 2H), 7.38 – 7.24 (m, 5H), 7.16 (d,  $J = 0.9$  Hz, 1H), 7.02 (s, 1H), 4.18 (dd,  $J = 9.6, 6.1$  Hz, 1H), 3.90 (s, 3H), 3.58 (t,  $J = 6.3$  Hz, 1H), 3.30 (dd,  $J = 9.6, 6.6$  Hz, 1H);

$^{13}\text{C}$  NMR (101 MHz,  $\text{CDCl}_3$ ):  $\delta = 193.29, 185.69, 143.32, 139.73, 138.05, 134.31$  (q,  $J = 32.5$  Hz, 1C), 129.58, 128.79, 128.77, 127.32, 127.22, 126.70, 125.61 (q,  $J = 3.8$  Hz, 2C), 123.59 (q,  $J = 272.6$  Hz, 1C), 38.25, 36.39, 36.10, 30.78;

$^{19}\text{F}$  NMR (376 MHz,  $\text{CDCl}_3$ )  $\delta = -63.09$ ;

HRMS (ESI,  $m/z$ ) calcd. for  $\text{C}_{22}\text{H}_{17}\text{F}_3\text{N}_2\text{O}_2\text{Na}^+$   $[\text{M}+\text{Na}]^+$ : 421.1140, found: 421.1136.

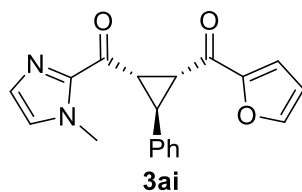

A dried 25 mL Schlenk tube was charged with **1a** (42.6 mg, 0.20 mmol), sulfoxonium ylide **2i** (63.4 mg, 0.24 mmol) and chiral catalyst  **$\Lambda$ -Rh3** (3.4 mg, 2.0 mol %). The tube was purged with argon, then DCE (0.6 mL) was added. The reaction mixture was stirred at 30°C for indicated time (monitored by TLC) under argon. After cooling to room temperature, the mixture was purified by flash column chromatography on silica gel (petroleum ether/ EtOAc = 5:1 to 2:1) to afford chiral product **3ai** as colorless oil (50.6 mg, yield: 79%).

Enantiomeric excess was determined by HPLC analysis,  $ee = 99\%$ , Chiralpak column AS-H,  $\lambda = 254$  nm,  $n$ -hexane/ $i$ -PrOH = 85:15, flow rate: 1.0 mL/min, 30 °C,  $t_r(\text{major}) = 12.820$  min,  $t_r(\text{minor}) = 17.134$  min;

$[\alpha]_D^{25} = +101.9^\circ$  ( $c = 0.1$ ,  $\text{CHCl}_3$ );

IR (KBr)  $\nu_{\text{max}}$ : 3421, 3113, 1668, 1605, 1564, 1510, 1464, 1438, 1401, 1286, 1255, 1224, 1159  $\text{cm}^{-1}$

$^1\text{H}$  NMR (400 MHz,  $\text{CDCl}_3$ ):  $\delta = 7.56$  (d,  $J = 1.4$  Hz, 1H), 7.36 – 7.20 (m, 7H), 7.01 (s, 1H), 6.49 (dt,  $J = 3.2, 1.4$  Hz, 1H), 3.98 – 3.93 (m, 4H), 3.56 (t,  $J = 6.4$  Hz, 1H), 3.33 (dd,  $J = 9.5, 6.4$  Hz, 1H);

$^{13}\text{C}$  NMR (101 MHz,  $\text{CDCl}_3$ ):  $\delta = 185.63, 182.86, 152.82, 146.66, 143.47, 138.41, 129.34, 128.67, 127.06, 127.01, 126.70, 117.79, 112.27, 37.28, 36.31, 36.15, 30.64$ ;

HRMS (ESI,  $m/z$ ) calcd. for  $\text{C}_{19}\text{H}_{16}\text{N}_2\text{O}_3\text{Na}^+$   $[\text{M}+\text{Na}]^+$ : 343.1059, found: 343.1053.

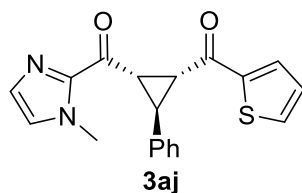

A dried 25 mL Schlenk tube was charged with **1a** (42.6 mg, 0.20 mmol), sulfoxonium ylide **2j** (48.5 mg, 0.24 mmol) and chiral catalyst **A-Rh3** (0.83 mg, 0.5 mol %). The tube was purged with argon, then DCE (0.6 mL) was added. The reaction mixture was stirred at 30°C for indicated time (monitored by TLC) under argon. After cooling to room temperature, the mixture was purified by flash column chromatography on silica gel (petroleum ether/ EtOAc = 5:1 to 2:1) to afford chiral product **3aj** as pale yellow oil (63.8 mg, yield: 95%).

Enantiomeric excess was determined by HPLC analysis, *ee* = 97%, Chiralpak column AS-H,  $\lambda$  = 254 nm, *n*-hexane/*i*-PrOH = 80:20, flow rate: 1.0 mL/min, 30 °C,  $t_r$ (minor) = 9.161 min,  $t_r$ (major) = 10.208 min;

$[\alpha]_D^{25} = +57.9^\circ$  ( $c = 0.1$ , CHCl<sub>3</sub>);

IR (KBr)  $\nu_{\max}$ : 3448, 2923, 1668, 1640, 1518, 1461, 1435, 1412, 1404, 1364, 1355, 1283, 1242, 1224, 1157 cm<sup>-1</sup>

<sup>1</sup>H NMR (400 MHz, CDCl<sub>3</sub>):  $\delta$  = 7.80 (d,  $J = 2.7$  Hz, 1H), 7.59 (d,  $J = 5.0$  Hz, 1H), 7.36 – 7.22 (m, 5H), 7.15 (s, 1H), 7.08 – 7.04 (m, 1H), 7.02 (s, 1H), 4.05 (dd,  $J = 9.5, 6.2$  Hz, 1H), 3.94 (s, 3H), 3.56 (t,  $J = 6.3$  Hz, 1H), 3.33 (dd,  $J = 9.5, 6.5$  Hz, 1H);

<sup>13</sup>C NMR (101 MHz, CDCl<sub>3</sub>):  $\delta$  = 186.65, 185.60, 144.15, 143.29, 138.28, 133.80, 132.63, 129.03, 128.69, 128.10, 127.08, 127.01, 126.67, 38.69, 36.15, 35.96, 30.80;

HRMS (ESI,  $m/z$ ) calcd. for C<sub>19</sub>H<sub>16</sub>N<sub>2</sub>O<sub>2</sub>SNa<sup>+</sup> [M+Na]<sup>+</sup>: 359.0830, found: 359.0826.

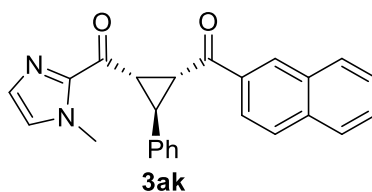



A dried 25 mL Schlenk tube was charged with **1a** (42.6 mg, 0.20 mmol), sulfoxonium ylide **2k** (59.1 mg, 0.24 mmol) and chiral catalyst **A-Rh3** (0.83 mg, 0.5 mol %). The tube was purged with argon, then DCE (0.6 mL) was added. The reaction mixture was stirred at 30°C for indicated time (monitored by TLC) under argon. After cooling to room temperature, the mixture was purified by flash column chromatography on silica gel (petroleum ether/ EtOAc = 5:1 to 2:1) to afford chiral product **3ak** as pale yellow oil (72.2 mg, yield: 95%).

Enantiomeric excess was determined by HPLC analysis, *ee* = 99%, Chiralpak column IA,  $\lambda$  = 254 nm, *n*-hexane/*i*-PrOH = 75:25, flow rate: 1.0 mL/min, 30 °C,  $t_r$ (major) = 14.021 min,  $t_r$ (minor) = 19.940 min;

$[\alpha]_D^{25} = +143.6^\circ$  ( $c = 0.2$ , CHCl<sub>3</sub>);

IR (KBr)  $\nu_{\max}$ : 3140, 3055, 3020, 1685, 1665, 1647, 1627, 1599, 1576, 1510, 1464, 1428, 1402, 1354, 1322, 1303, 1280, 1251, 1219, 1191, 1155, 1123 cm<sup>-1</sup>;

<sup>1</sup>H NMR (400 MHz, CDCl<sub>3</sub>):  $\delta$  = 8.60 (s, 1H), 8.06 (dd,  $J = 8.6, 1.8$  Hz, 1H), 7.92 – 7.87 (m, 1H), 7.83 (dd,  $J = 8.5, 2.0$  Hz, 2H), 7.54 (dddd,  $J = 23.8, 8.1, 6.9, 1.3$  Hz, 2H), 7.36 (d,  $J = 4.3$  Hz, 4H), 7.31 – 7.23 (m, 1H), 7.15 (d,  $J = 0.9$  Hz, 1H), 6.95 (s, 1H), 4.23 (dd,  $J = 9.7, 6.1$  Hz, 1H), 3.84 (s, 3H), 3.65 (t,  $J = 6.3$  Hz, 1H), 3.48 (dd,  $J = 9.7, 6.6$  Hz, 1H);

<sup>13</sup>C NMR (101 MHz, CDCl<sub>3</sub>):  $\delta$  = 193.81, 185.94, 143.50, 138.57, 135.61, 134.39, 132.44, 130.49, 129.67, 129.42, 128.73, 128.51, 128.38, 127.75, 127.19, 127.06, 126.77, 126.71, 124.13, 38.65, 36.31, 36.06, 30.50;

HRMS (ESI, *m/z*) calcd. for C<sub>25</sub>H<sub>20</sub>N<sub>2</sub>O<sub>2</sub>Na<sup>+</sup> [M+Na]<sup>+</sup>: 403.1423, found: 403.1417.

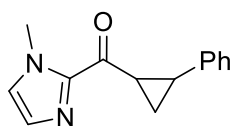

**3am**

A dried 25 mL Schlenk tube was charged with **1a** (42.6 mg, 0.20 mmol), sulfur ylide **2m** (0.24 mmol) and chiral catalyst **A-Rh3** (1.6 mg, 1.0 mol %). The tube was purged

with argon, then DCE (0.6 mL) was added. The reaction mixture was stirred at 30°C for indicated time (monitored by TLC) under argon. After cooling to room temperature, the mixture was purified by flash column chromatography on silica gel (petroleum ether/ EtOAc = 10:1 to 5:1) to afford **3am** as pale yellow oil (32.6 mg, yield: 72%). Dr = 7:1 was determined by crude <sup>1</sup>H NMR analysis.

Enantiomeric excess was determined by HPLC analysis, *ee* = 0% (for the major diastereoisomer), Chiralpak column OJH, λ = 254 nm, *n*-hexane/*i*-PrOH = 80:20, flow rate: 1.0 mL/min, 30 °C, t<sub>r</sub> = 9.798 min and 12.221 min;

<sup>1</sup>H NMR (400 MHz, CDCl<sub>3</sub>): δ = 7.33 – 7.23 (m, 2H), 7.21 – 7.11 (m, 4H), 7.04 (s, 1H), 4.01 (s, 3H), 3.65 – 3.54 (m, 1H), 2.69 (ddd, *J*=9.2, 6.6, 4.0, 1H), 1.80 (ddd, *J*=9.2, 5.3, 4.0, 1H), 1.52 (ddd, *J*=8.4, 6.6, 4.0, 1H);

<sup>13</sup>C NMR (101 MHz, CDCl<sub>3</sub>): δ = 190.48, 140.55, 129.50, 128.54, 127.12, 126.54, 126.38, 126.27, 36.28, 29.78, 29.35, 20.27;

HRMS (ESI, *m/z*) calcd. for C<sub>14</sub>H<sub>14</sub>N<sub>2</sub>ONa<sup>+</sup> [M+Na]<sup>+</sup>: 249.1004, found: 249.0998.

## 5. Synthetic Transformations

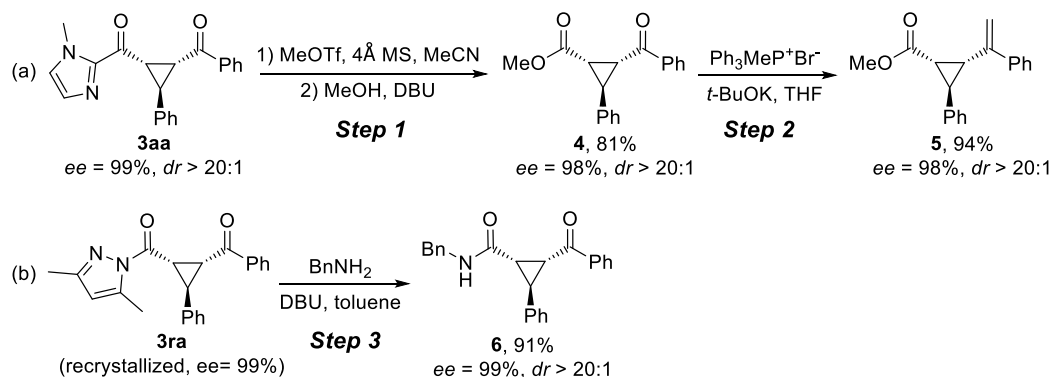

### Step 1:

4 Å MS (500 mg, 100 mg/0.1 mmol of **3aa**) was added to a solution of **3aa** (165.2 mg, 0.5 mmol) in dry  $\text{CH}_3\text{CN}$  (5 mL) under argon atmosphere. The suspension was stirred vigorously under a positive pressure of argon for 2 hours at  $25^\circ\text{C}$ . Then methyl trifluoromethanesulfonate (226.4  $\mu\text{L}$ , 2.0 mmol, 4.0 eq.) was added. After being stirred at  $25^\circ\text{C}$  for 12 hours, MeOH (2.7 mL) and DBU (113  $\mu\text{L}$ , 0.75 mmol, 1.5 eq.) were subsequently added. After being stirred at  $25^\circ\text{C}$  for 30 min, the reaction mixture was concentrated and the residue was subjected to a silica gel flash chromatography (petroleum ether/ EtOAc = 10:1 to 4:1) to afford product **4** as colorless oil (113.4 mg, yield: 81%).

Enantiomeric excess was determined by HPLC analysis,  $ee = 98\%$ , Chiralpak column AS-H,  $\lambda = 254\text{ nm}$ ,  $n\text{-hexane}/i\text{-PrOH} = 85:15$ , flow rate: 1.0 mL/min,  $30^\circ\text{C}$ ,  $t_r(\text{minor}) = 8.721\text{ min}$ ,  $t_r(\text{major}) = 10.920\text{ min}$ ;

$[\alpha]_{\text{D}}^{25} = -71.4^\circ$  ( $c = 0.1$ ,  $\text{CHCl}_3$ );

IR (KBr)  $\nu_{\text{max}}$ : 3424, 3051, 3006, 2957, 1975, 1955, 1916, 1892, 1816, 1719, 1673, 1605, 1595, 1579, 1504, 1462, 1449, 1438, 1364, 1341, 1330, 1317, 1313, 1284, 1227, 1205, 1180, 1175, 1156  $\text{cm}^{-1}$ ;

$^1\text{H NMR}$  (400 MHz,  $\text{CDCl}_3$ ):  $\delta = 8.01$  (dd,  $J = 8.1, 1.6\text{ Hz}$ , 2H), 7.60 – 7.53 (m, 1H), 7.46 (t,  $J = 7.7\text{ Hz}$ , 2H), 7.37 – 7.30 (m, 2H), 7.30 – 7.19 (m, 3H), 3.65 (s, 3H), 3.36 (t,  $J = 6.2\text{ Hz}$ , 1H), 3.12 (dd,  $J = 9.4, 6.4\text{ Hz}$ , 1H), 2.66 (dd,  $J = 9.4, 6.1\text{ Hz}$ , 1H);

$^{13}\text{C}$  NMR (101 MHz,  $\text{CDCl}_3$ ):  $\delta = 193.94, 169.73, 137.96, 136.86, 133.42, 128.81, 128.71, 128.42, 127.27, 126.58, 52.29, 35.04, 31.56, 30.11$ ;

HRMS (ESI,  $m/z$ ) calculated for  $\text{C}_{18}\text{H}_{16}\text{O}_3\text{Na}^+$   $[\text{M}+\text{Na}]^+$ : 303.0997, found: 303.0994.

## Step 2:

According to a reported procedure <sup>[12]</sup>, under argon atmosphere, potassium *tert*-butoxide (31 mg, 0.28 mmol) powder was added to a solution of methyltriphenylphosphonium bromide (107 mg, 0.3 mmol) in 2 mL THF in ice bath. The reaction mixture was stirred for 30 min. a solution of **4** (54.0 mg, 0.2 mmol) in 1 mL THF was added by syringe. The resulting solution was stirred at 50 °C and monitored by TLC analysis. After 5 h, the reaction was cooled to room temperature and quenched with 5 mL saturated aqueous  $\text{NH}_4\text{Cl}$  in ice bath. The resulting solution was extracted with ethyl acetate (3×5 mL). The combined organic layers were dried over  $\text{Na}_2\text{SO}_4$ , filtered and concentrated in *vacuo*. The residue was purified by flash chromatography on silica gel (ethyl acetate/petroleum ether = 1:15) to afford the desired product **5** as colorless oil (52 mg, 94% yield). The racemic reaction was carried out in the same condition.

Enantiomeric excess was determined by HPLC analysis, *ee* = 98%, Chiralpak column ID,  $\lambda = 254$  nm, *n*-hexane/*i*-PrOH = 90:10, flow rate: 1.0 mL/min, 30 °C,  $t_r(\text{minor}) = 5.400$  min,  $t_r(\text{major}) = 6.329$  min;

$[\alpha]_{\text{D}}^{25} = -39^\circ$  ( $c = 0.1, \text{CHCl}_3$ );

IR (KBr)  $\nu_{\text{max}}$ : 3382, 3036, 1704, 1697, 1638, 1599, 1568, 1422, 1403, 1367, 1310, 1295, 1205, 1134  $\text{cm}^{-1}$

$^1\text{H}$  NMR (400 MHz,  $\text{CDCl}_3$ ):  $\delta = 7.52$  (s, 2H), 7.36 – 7.30 (m, 4H), 7.30 – 7.20 (m, 4H), 5.69 (s, 1H), 5.37 (s, 1H), 3.49 (s, 3H), 3.06 (dd,  $J = 6.7, 5.5$  Hz, 1H), 2.68 (t,  $J = 6.4$  Hz, 1H), 2.44 (dd,  $J = 9.6, 5.1$  Hz, 1H);

$^{13}\text{C}$  NMR (101 MHz,  $\text{CDCl}_3$ ):  $\delta = 170.43, 141.78, 140.14, 139.38, 128.64, 128.29, 127.67, 126.75, 126.64, 125.87, 115.38, 51.71, 34.36, 30.67, 29.65$ ;

HRMS (ESI,  $m/z$ ) calculated for  $C_{19}H_{18}O_2Na^+$   $[M+Na]^+$ : 301.1204, found: 301.1202.

### Step 3:

According to a reported procedure <sup>[13]</sup>, a solution of **3ra** (68 mg, 0.2 mmol, recrystallized) benzylamine (42  $\mu$ L, 0.4 mmol) and DBU (30  $\mu$ L, 0.2 mmol) in toluene (2 mL) was heated to reflux for overnight. After being cooled to room temperature, the solvent was removed under reduced pressure. The residue was purified by flash chromatography on silica gel (ethyl acetate/petroleum ether = 1:5 to 1:3) to afford compound **6** (64 mg, 91%) as a white solid, mp 130–131 °C. The racemic reaction was carried out in the same condition.

Enantiomeric excess was determined by HPLC analysis,  $ee = 99\%$ , Chiralpak column IC,  $\lambda = 254$  nm,  $n$ -hexane/ $i$ -PrOH = 75:25, flow rate: 1.0 mL/min, 30 °C,  $t_r$ (minor) = 6.144 min,  $t_r$ (major) = 6.926 min;

$[\alpha]_D^{25} = -31.7^\circ$  ( $c = 0.1$ ,  $CHCl_3$ );

IR (KBr)  $\nu_{max}$ : 3241, 3017, 2950, 1714, 1680, 1649, 1631, 1593, 1542, 1484, 1460, 1400, 1369, 1315, 1281, 1297, 1185, 1062  $cm^{-1}$

$^1H$  NMR (400 MHz,  $CDCl_3$ ):  $\delta = 7.94 - 7.86$  (m, 2H), 7.53 (t,  $J = 7.4$  Hz, 1H), 7.40 (t,  $J = 7.7$  Hz, 2H), 7.31 – 7.21 (m, 5H), 7.16 (d,  $J = 4.6$  Hz, 5H), 6.67 (t,  $J = 5.6$  Hz, 1H), 4.47 (qd,  $J = 14.7, 5.7$  Hz, 2H), 3.66 (dd,  $J = 10.1, 4.8$  Hz, 1H), 3.45 (dd,  $J = 10.1, 6.1$  Hz, 1H), 3.13 (dd,  $J = 6.2, 4.8$  Hz, 1H);

$^{13}C$  NMR (101 MHz,  $CDCl_3$ ):  $\delta = 194.68, 170.32, 137.85, 137.49, 134.34, 133.25, 128.85, 128.76, 128.63, 128.35, 128.15, 127.91, 127.62, 127.12, 44.11, 35.41, 34.56, 27.84$ ;

HRMS (ESI,  $m/z$ ) calculated for  $C_{24}H_{22}NO_2^+$   $[M+H]^+$ : 356.1651, found: 356.1648.

## 6. $^1\text{H}$ NMR and $^{13}\text{C}$ NMR Spectra

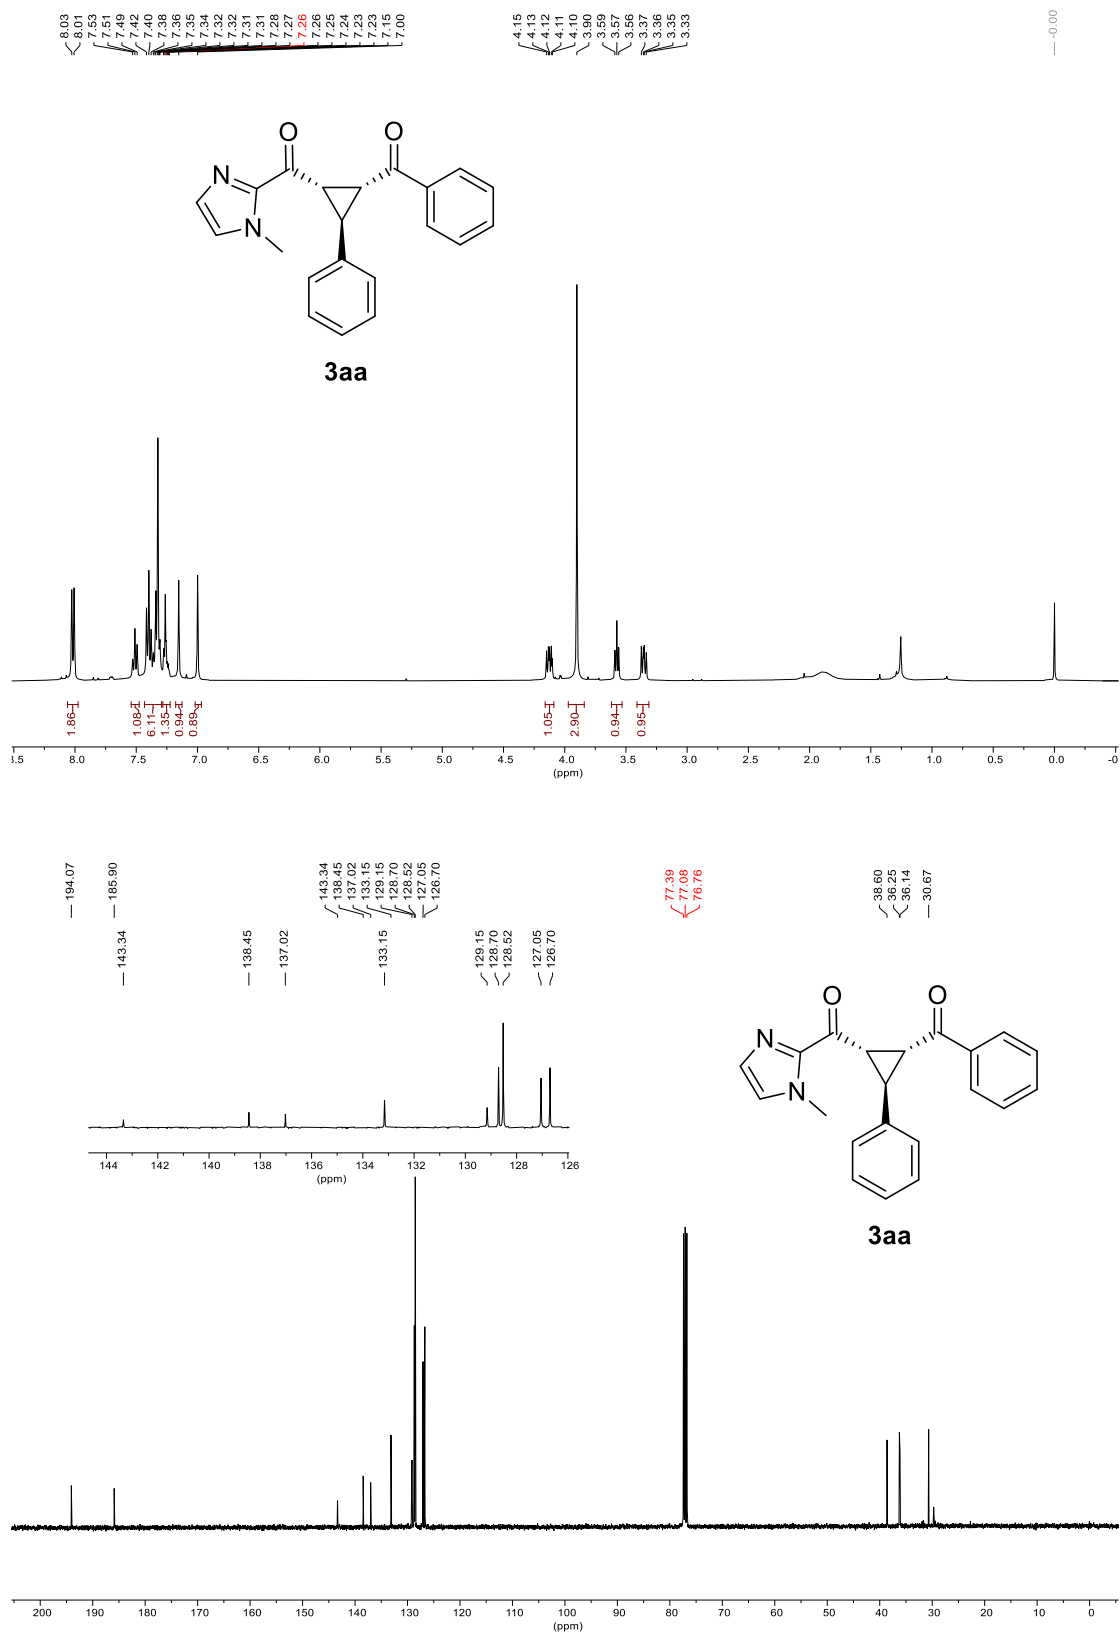

Figure S1.  $^1\text{H}$  and  $^{13}\text{C}$  NMR spectrum of **3aa**.

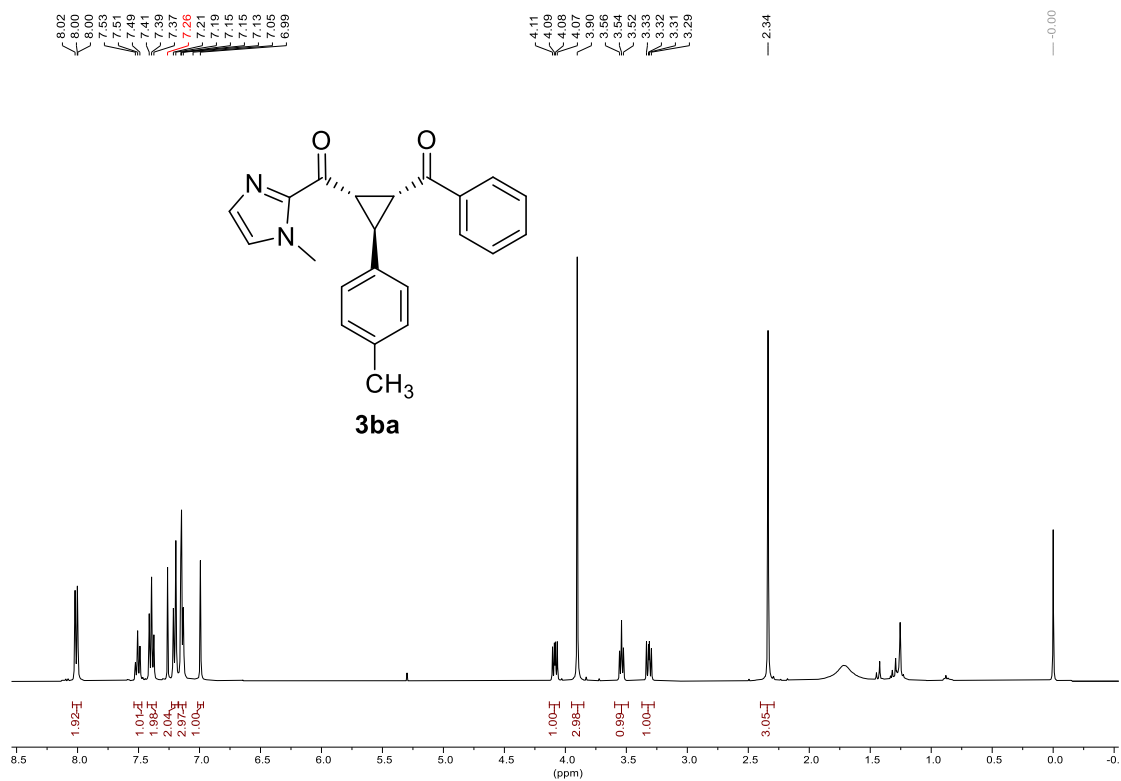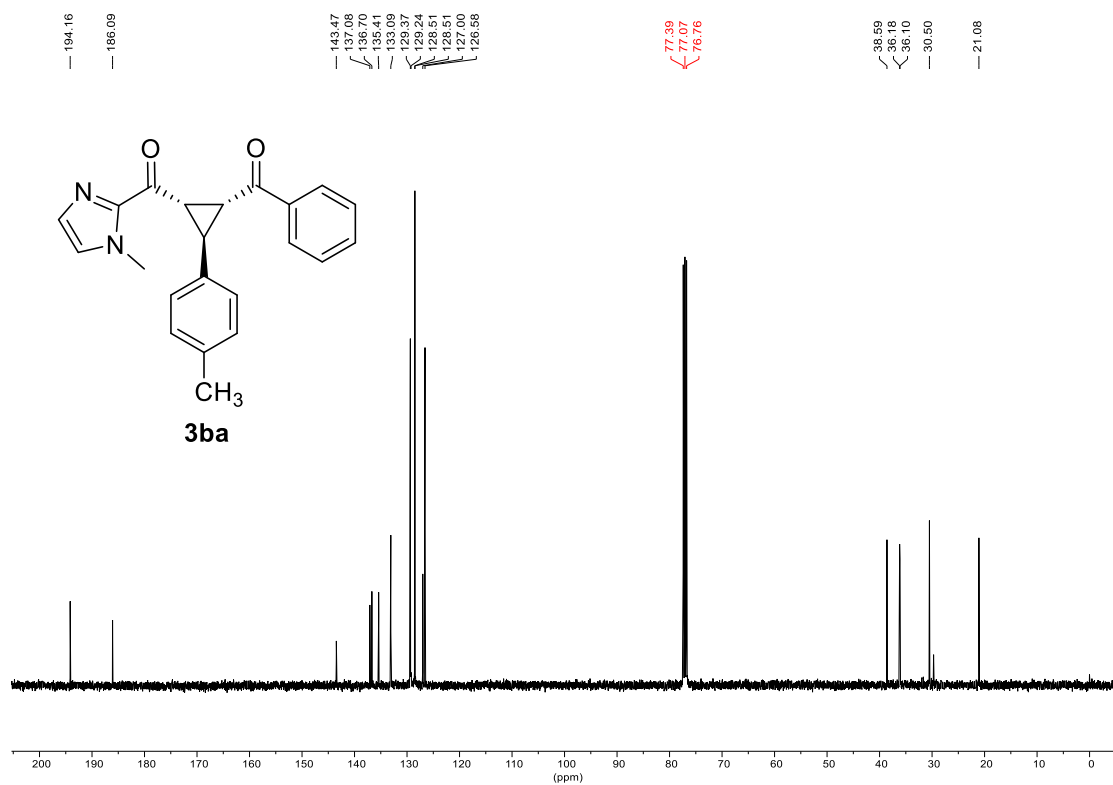

**Figure S2.**  $^1\text{H}$  and  $^{13}\text{C}$  NMR spectrum of **3ba**.

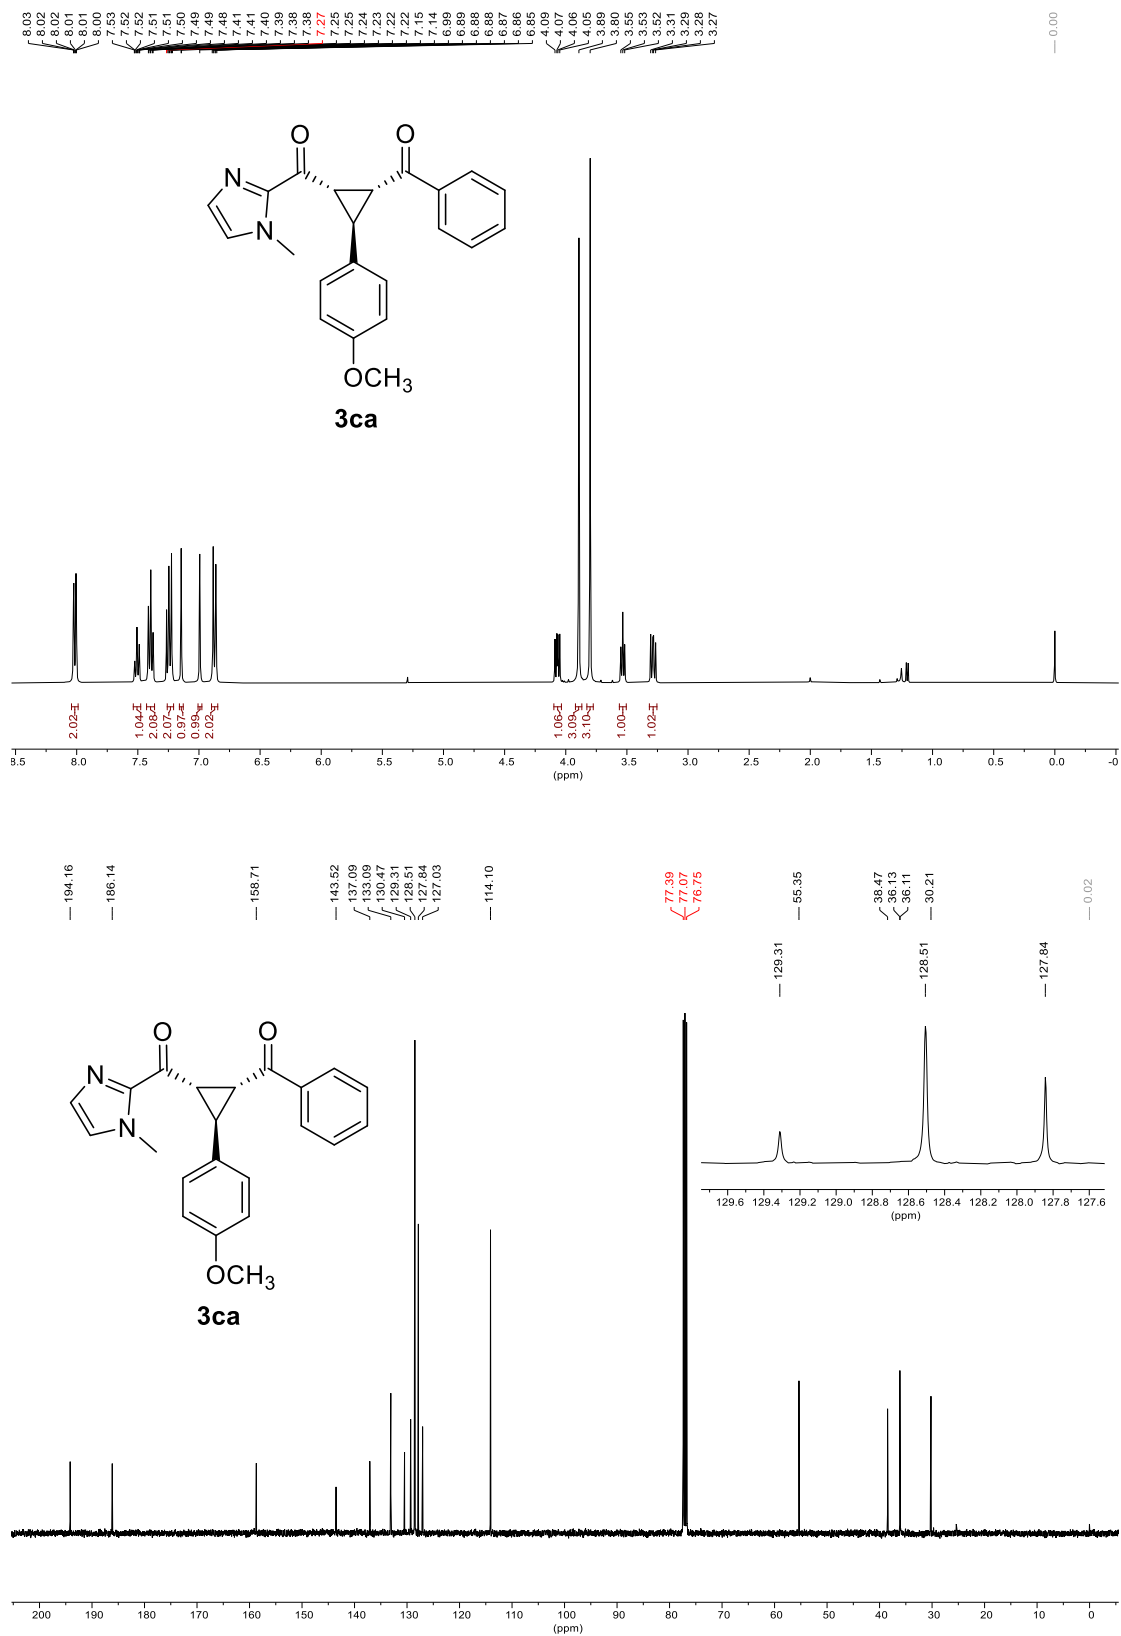

Figure S3. <sup>1</sup>H and <sup>13</sup>C NMR spectrum of **3ca**.



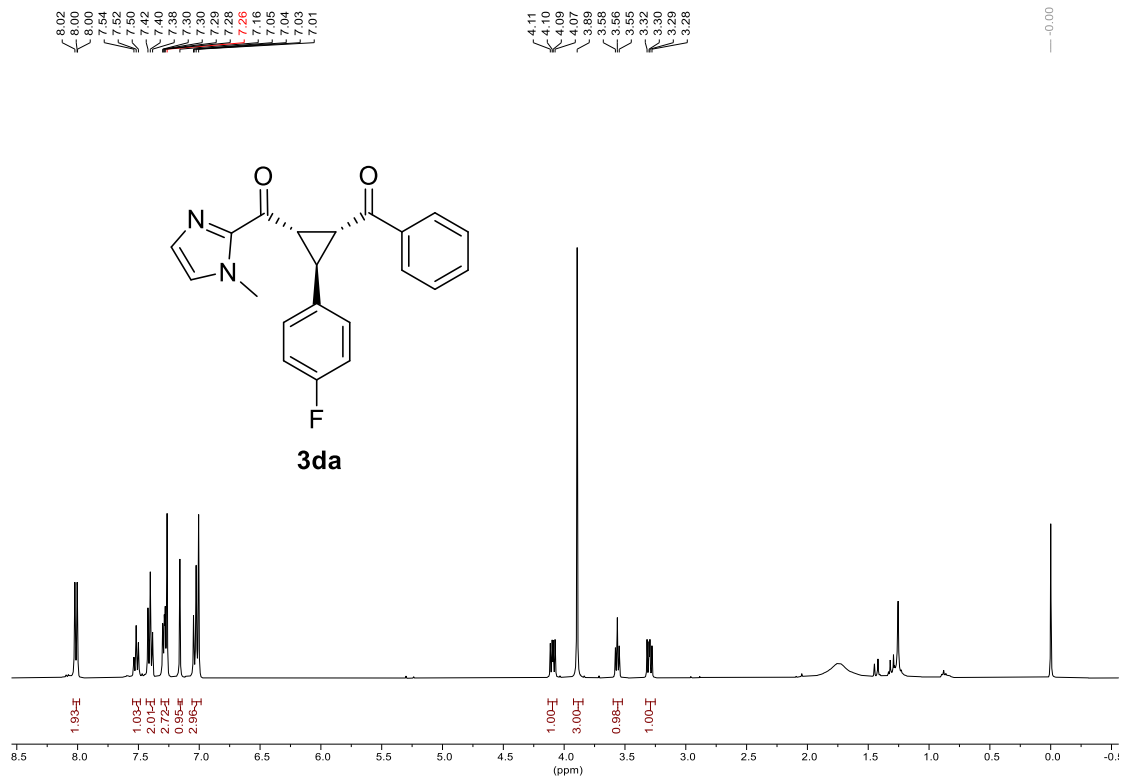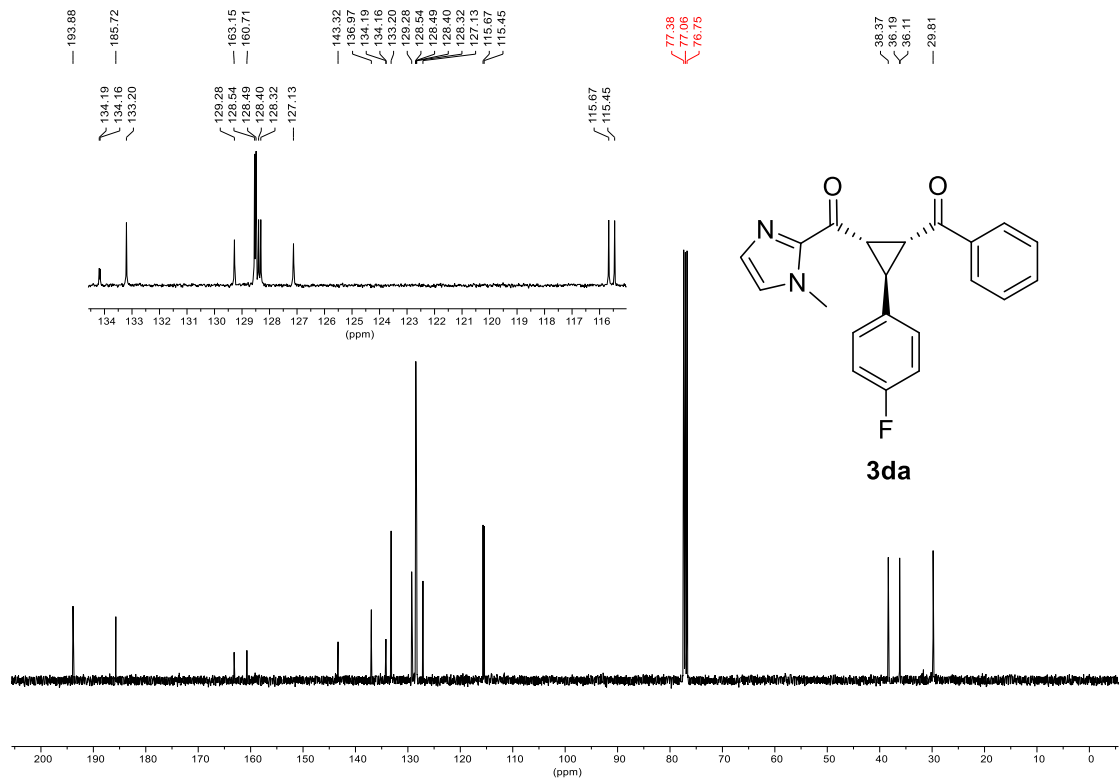

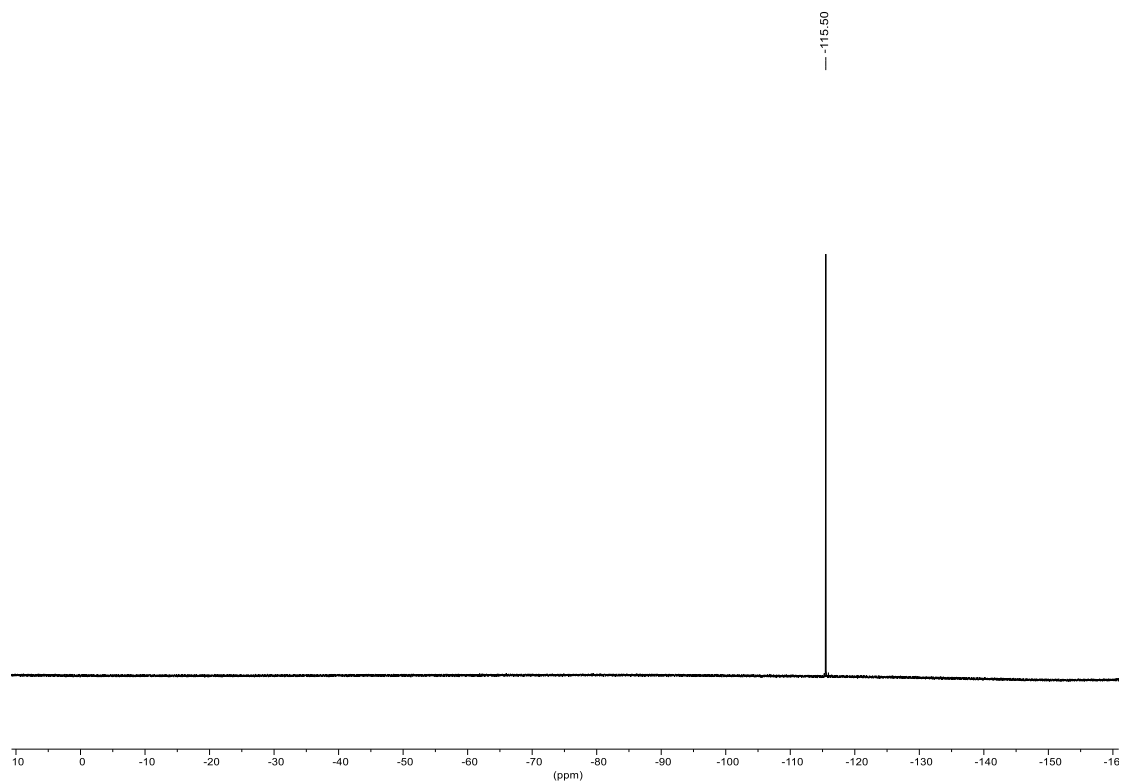

**Figure S4.**  $^1\text{H}$ ,  $^{13}\text{C}$  and  $^{19}\text{F}$  NMR spectrum of **3da**.

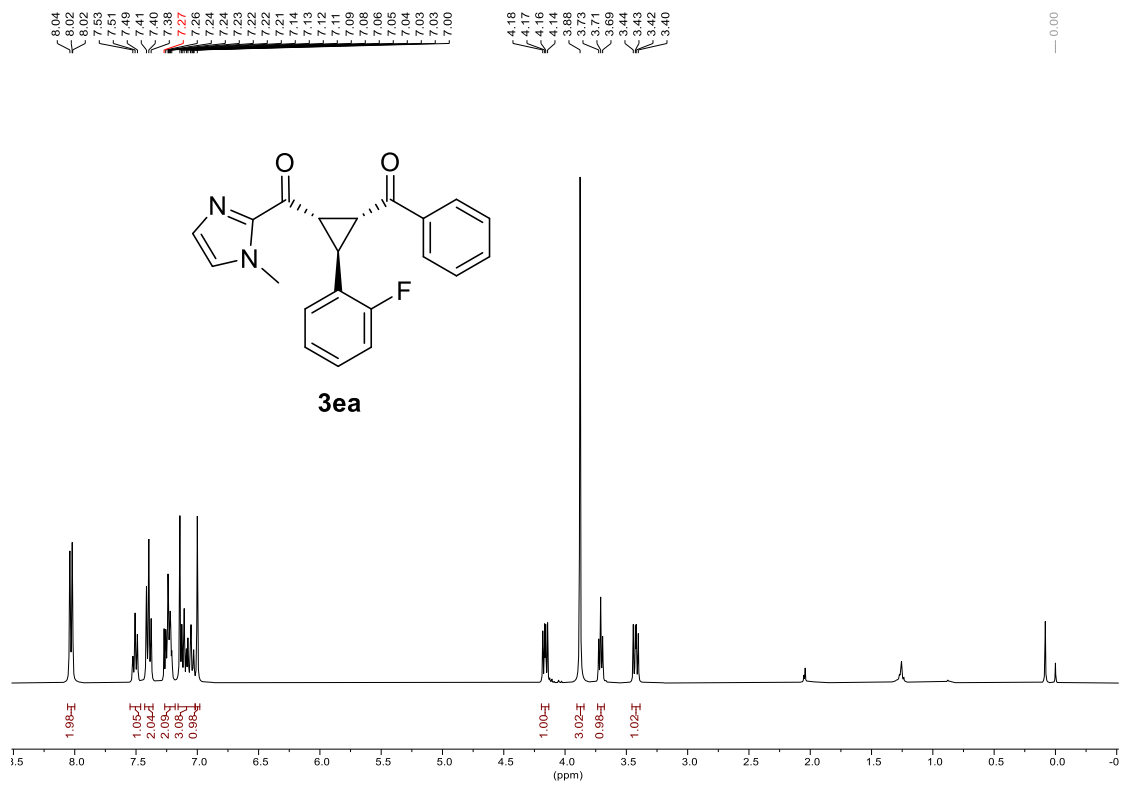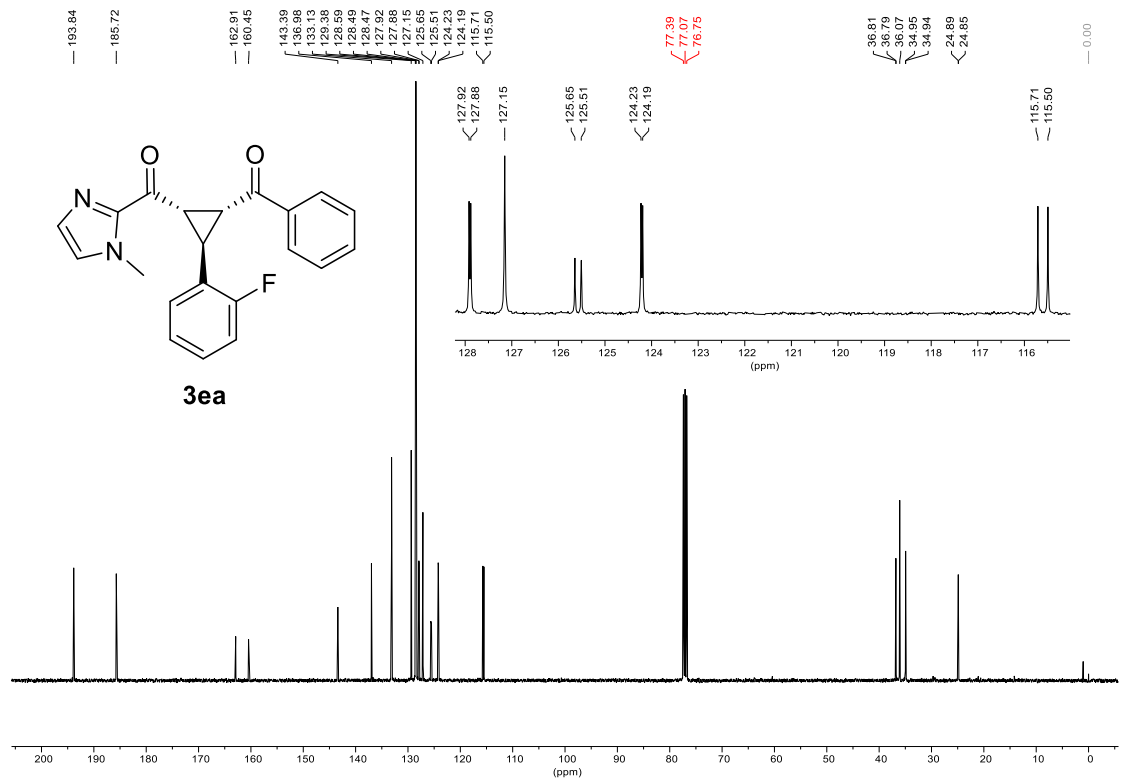

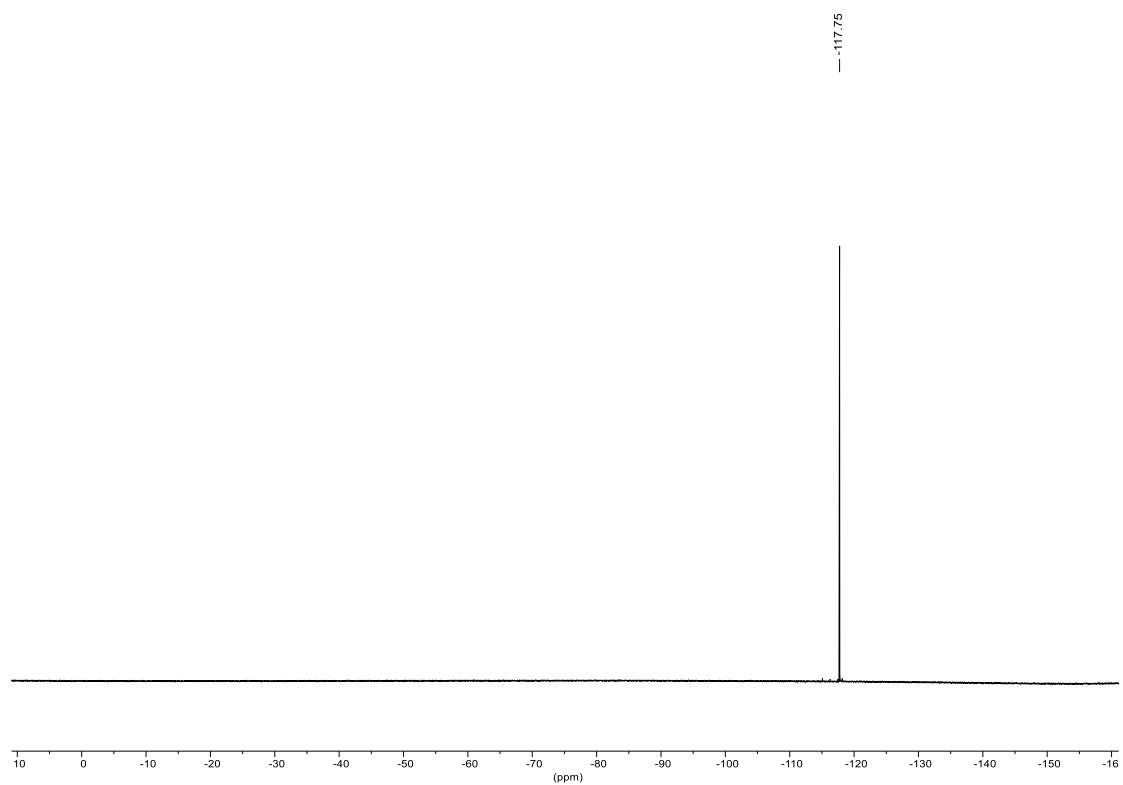

**Figure S5.**  $^1\text{H}$ ,  $^{13}\text{C}$  and  $^{19}\text{F}$  NMR spectrum of **3ea**.

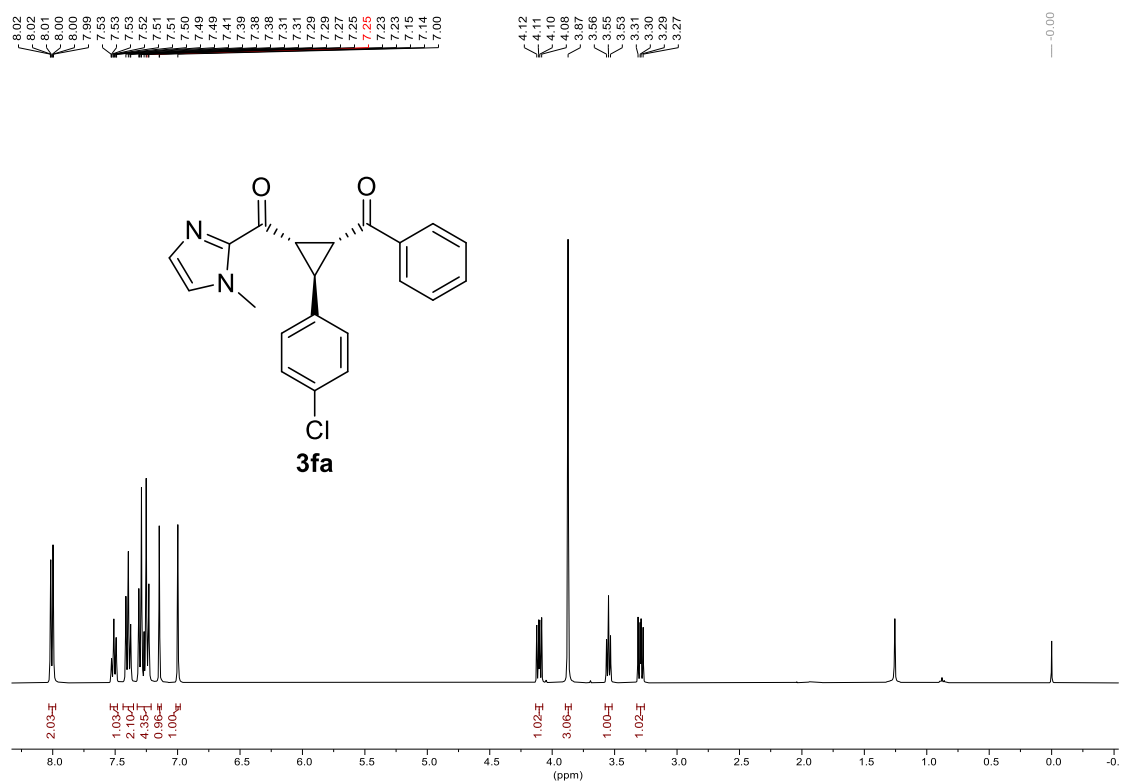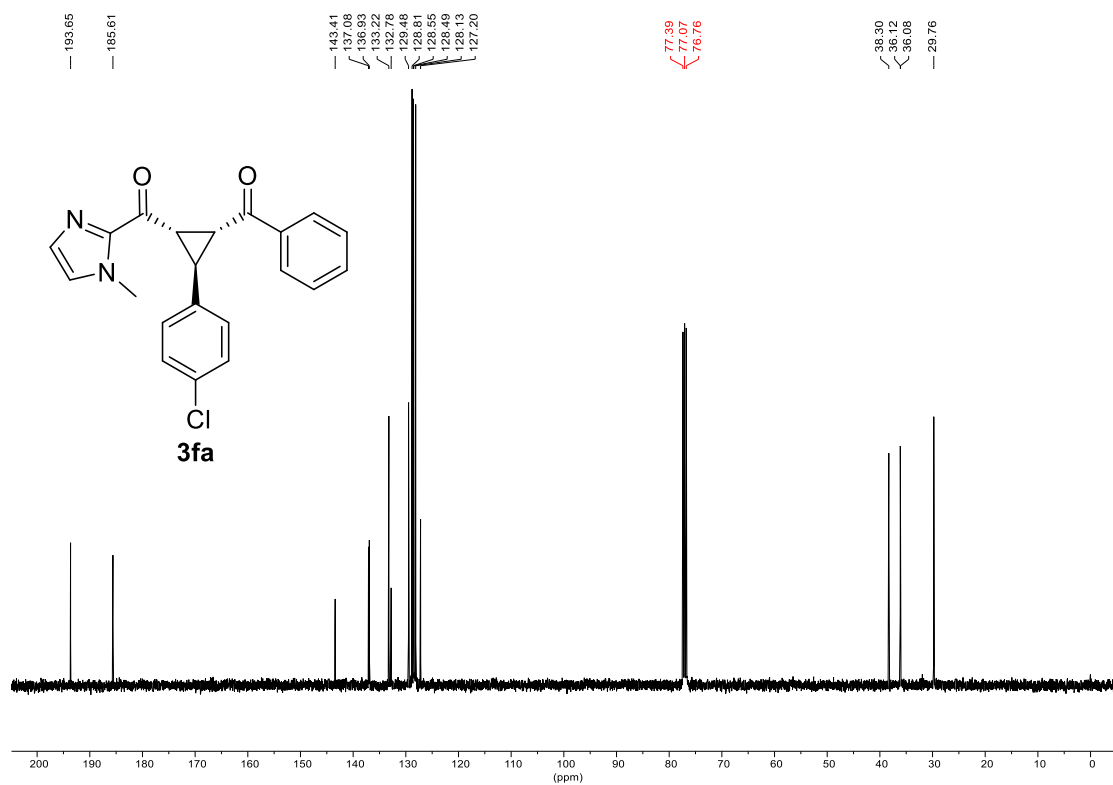

**Figure S6.** <sup>1</sup>H and <sup>13</sup>C NMR spectrum of **3fa**.

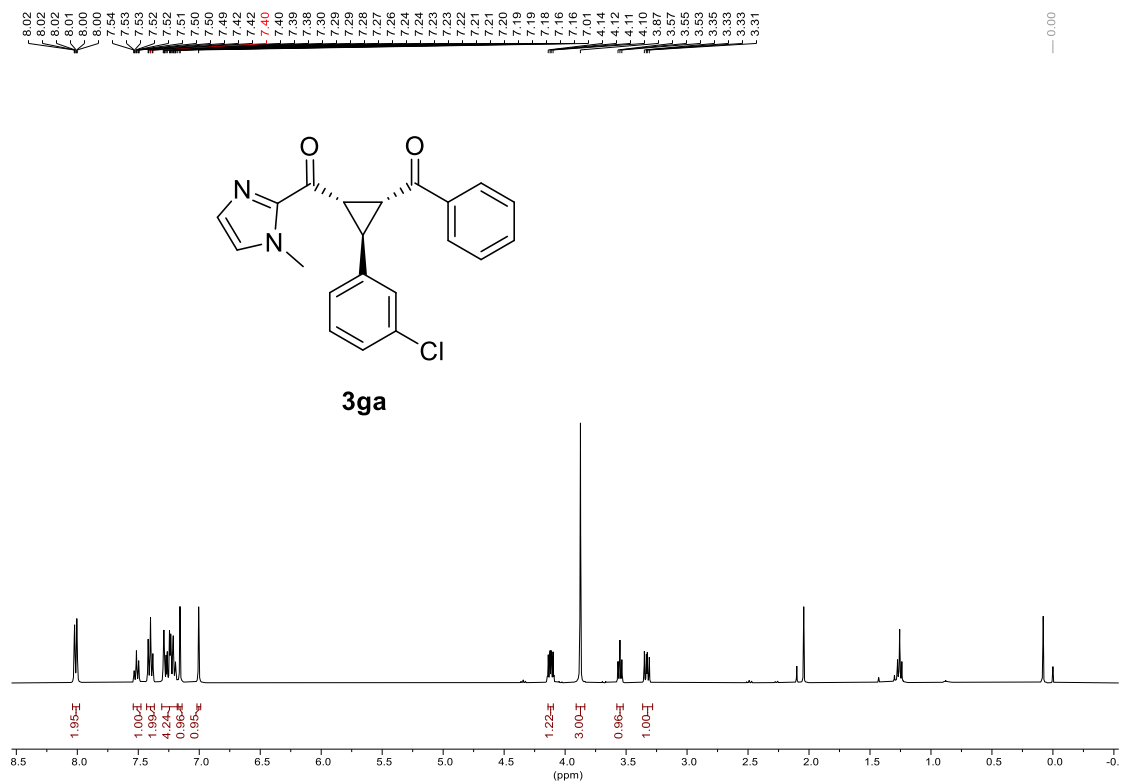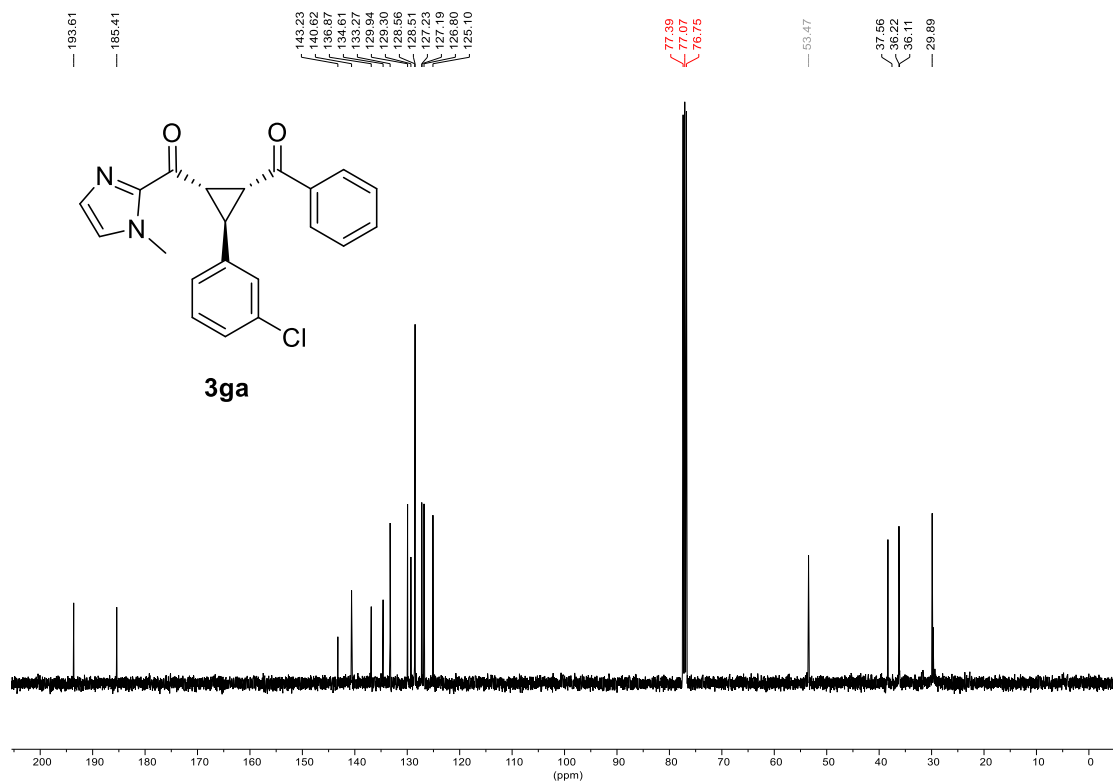

Figure S7.  $^1\text{H}$  and  $^{13}\text{C}$  NMR spectrum of **3ga**.

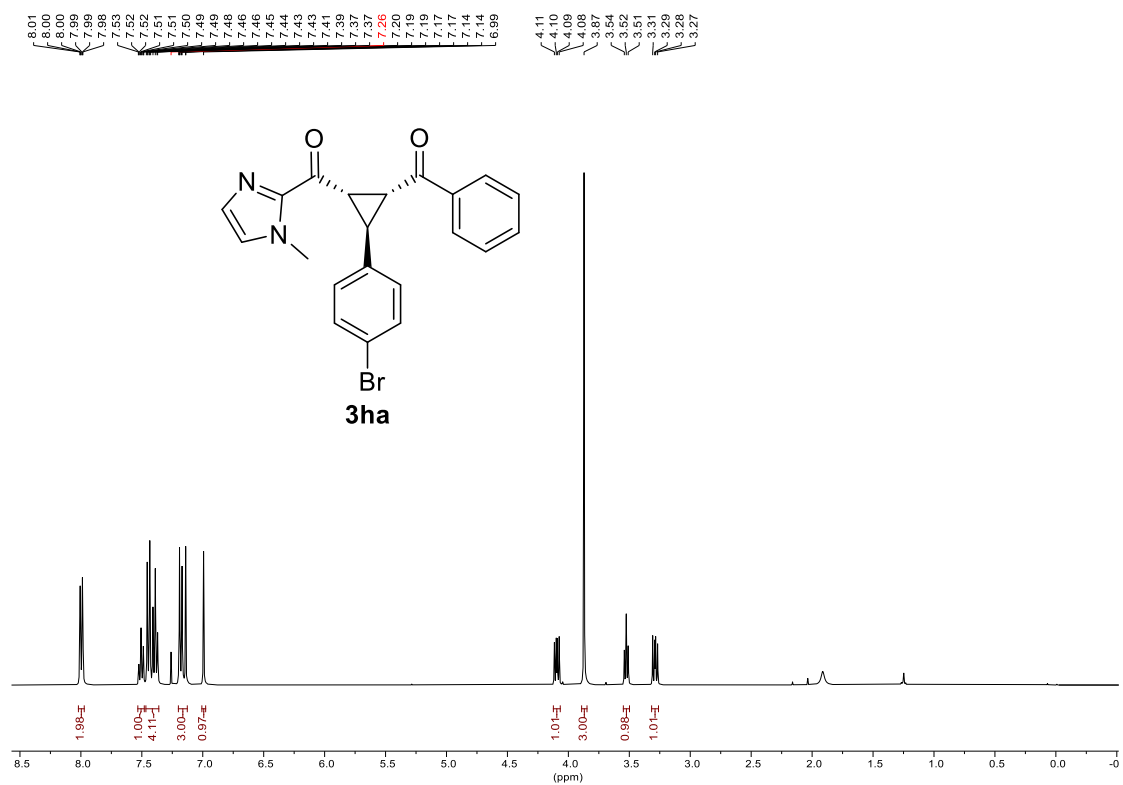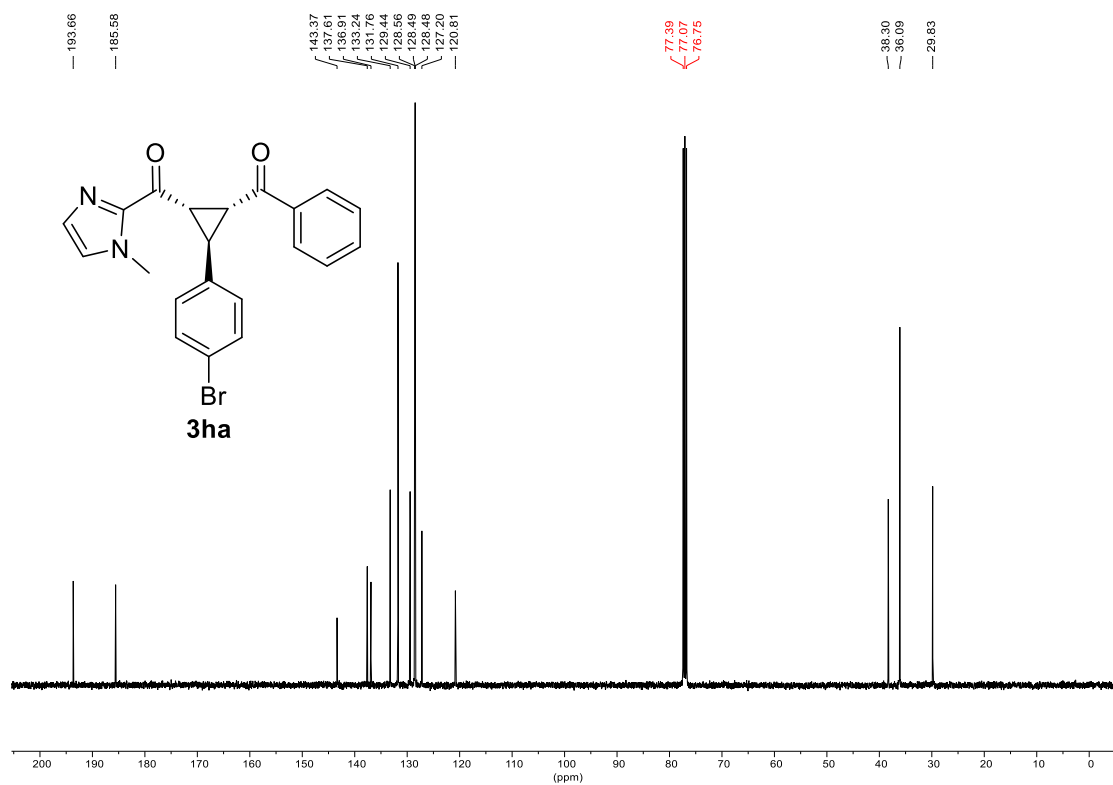

**Figure S8.**  $^1\text{H}$  and  $^{13}\text{C}$  NMR spectrum of **3ha**.

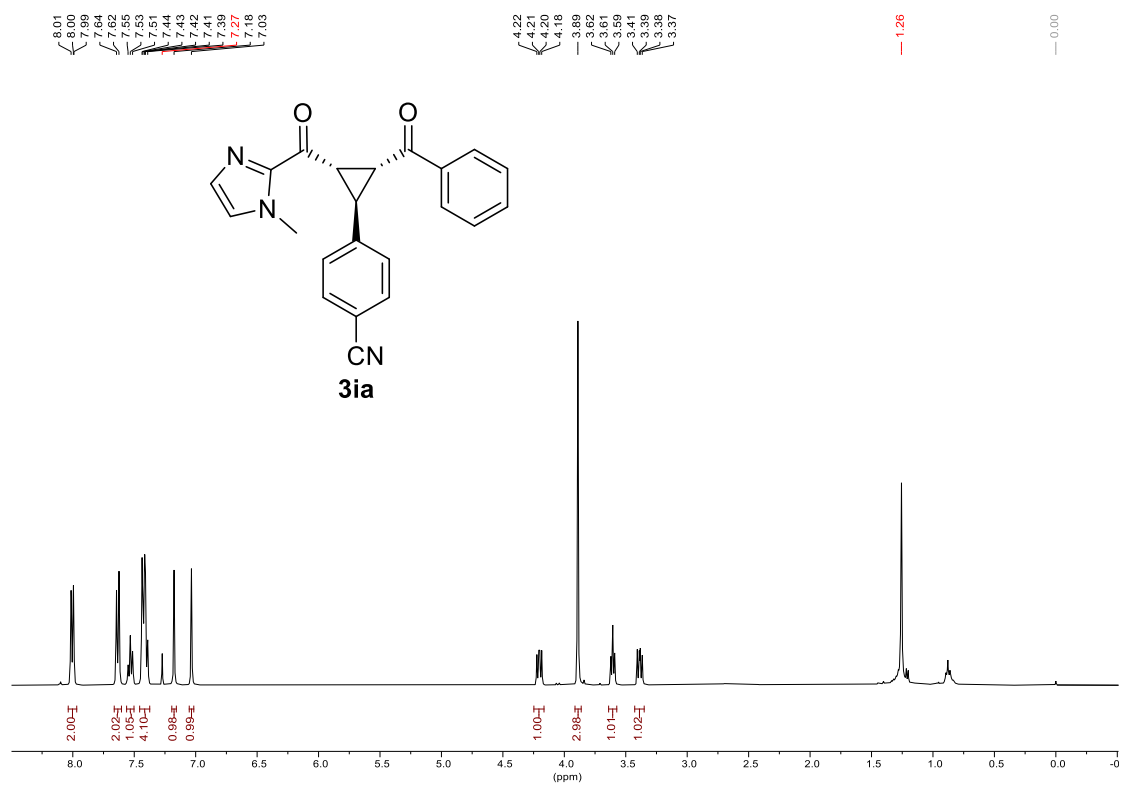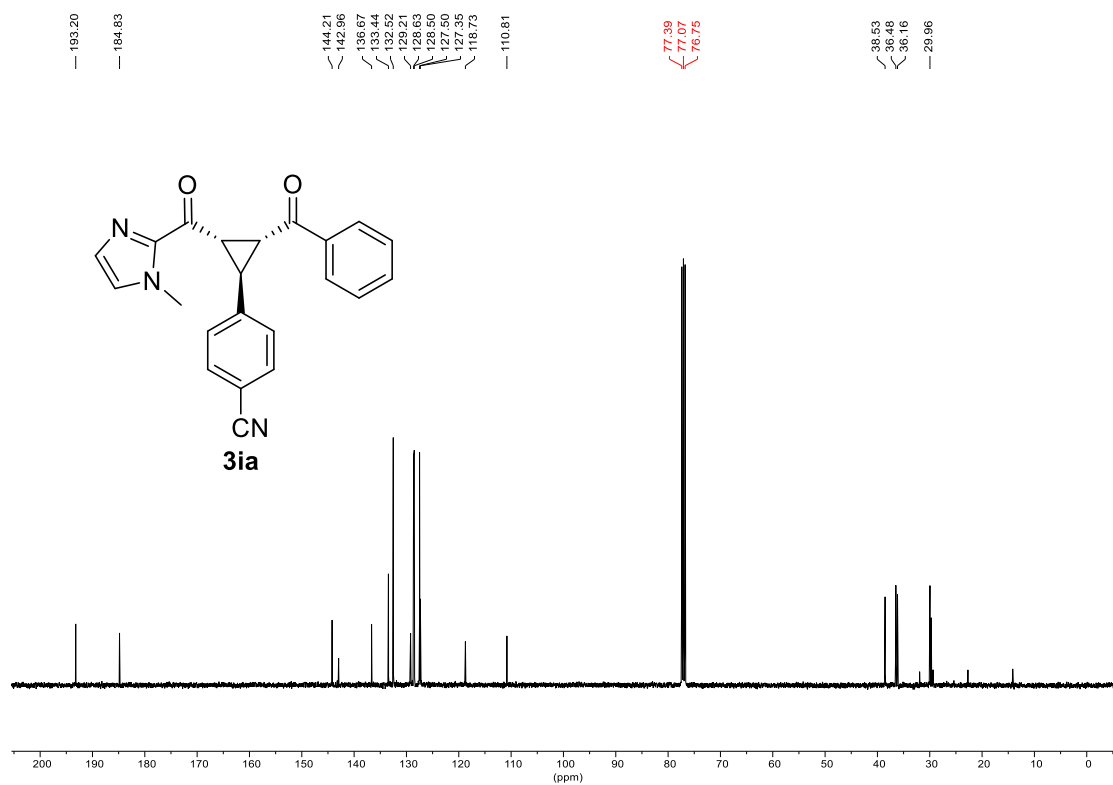

**Figure S9.** <sup>1</sup>H and <sup>13</sup>C NMR spectrum of **3ia**.



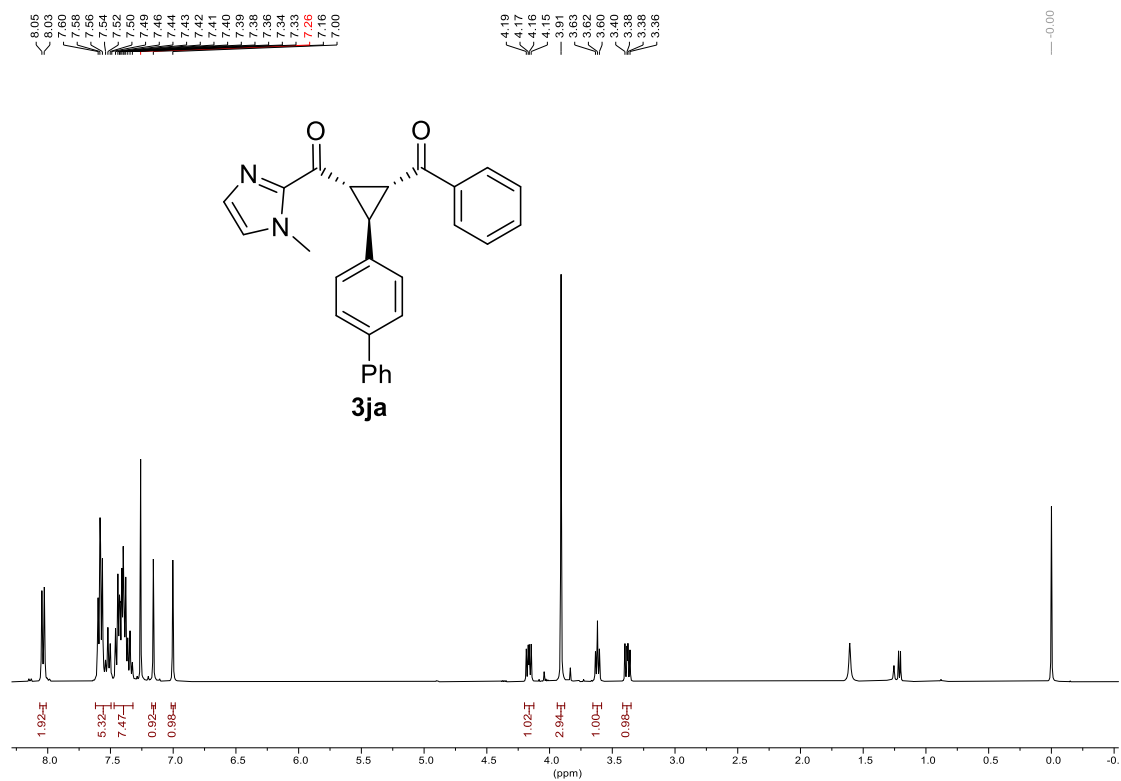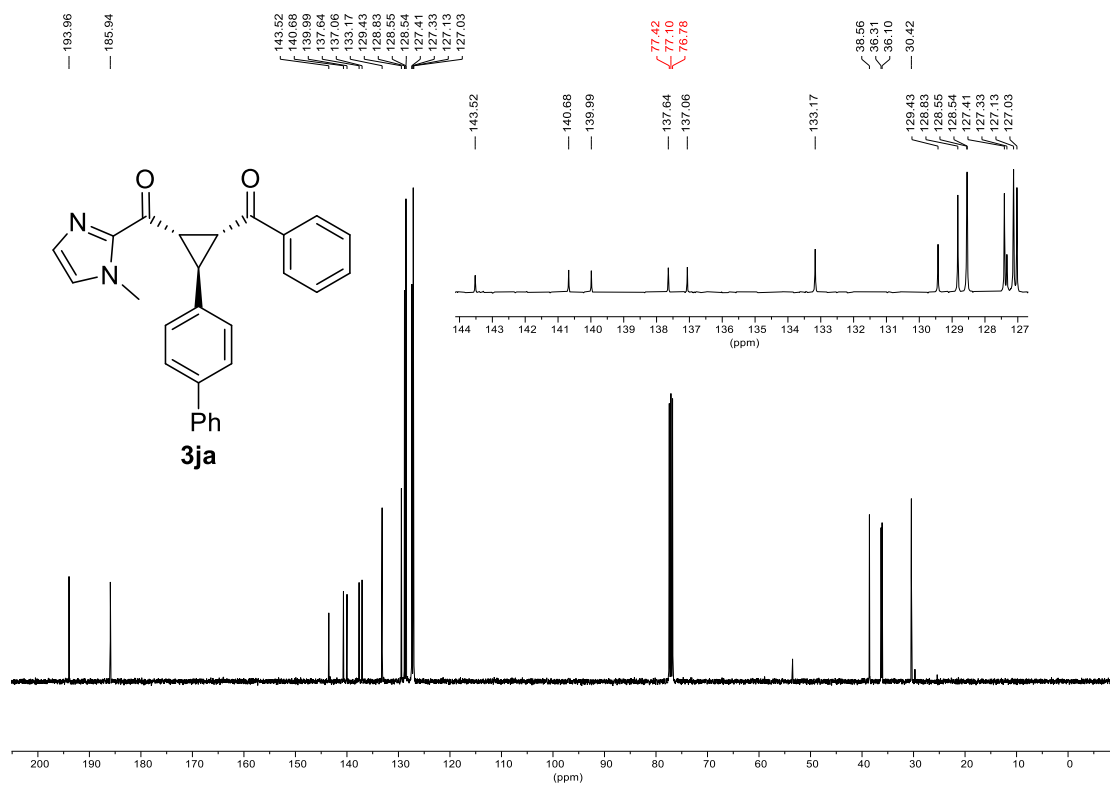

**Figure S10.** <sup>1</sup>H and <sup>13</sup>C NMR spectrum of 3ja.

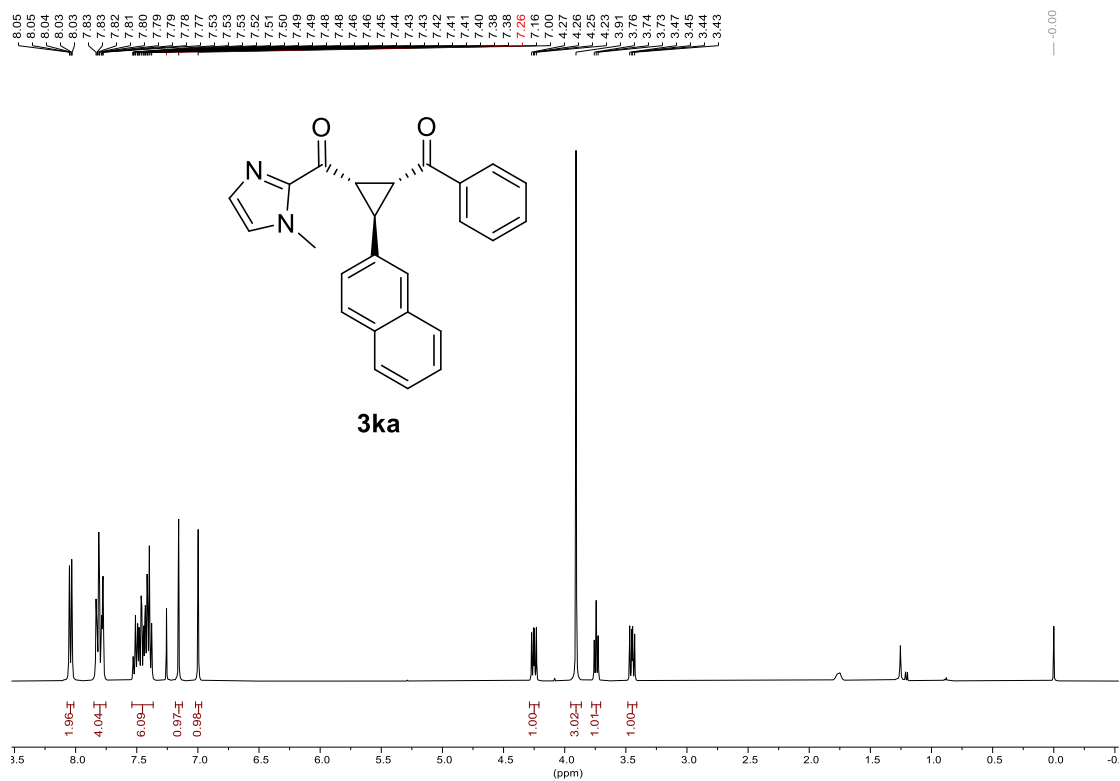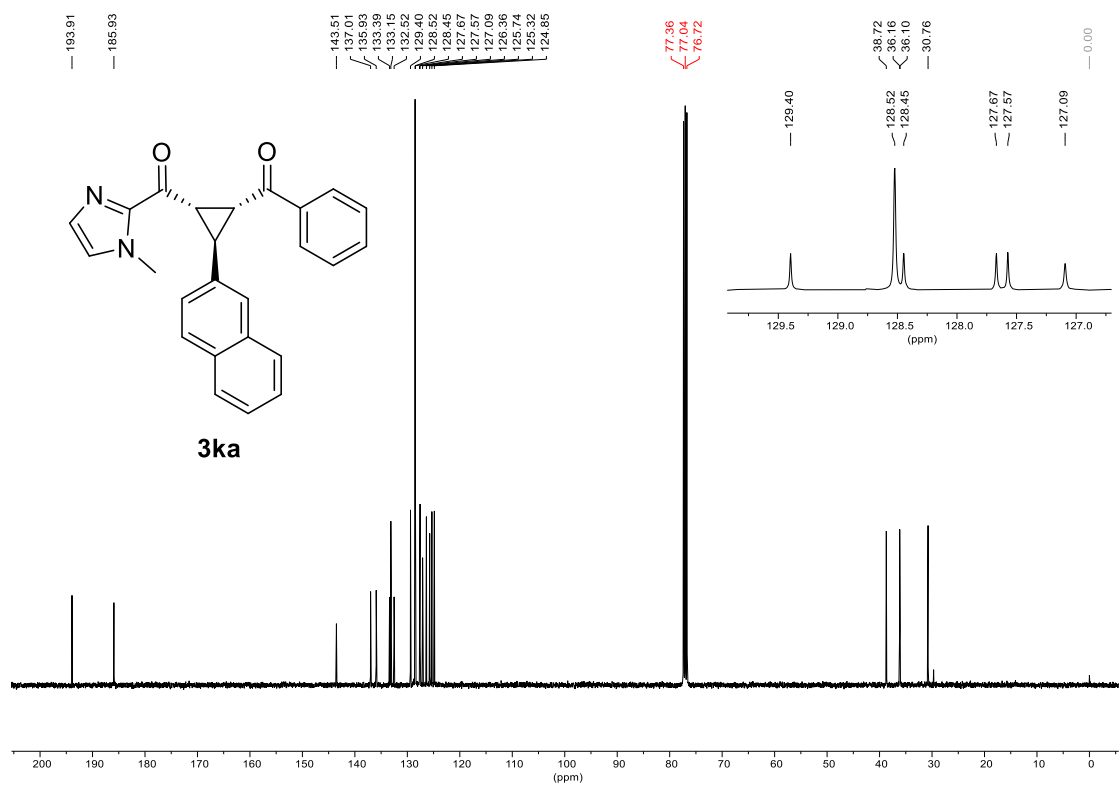

Figure S11.  $^1\text{H}$  and  $^{13}\text{C}$  NMR spectrum of **3ka**.

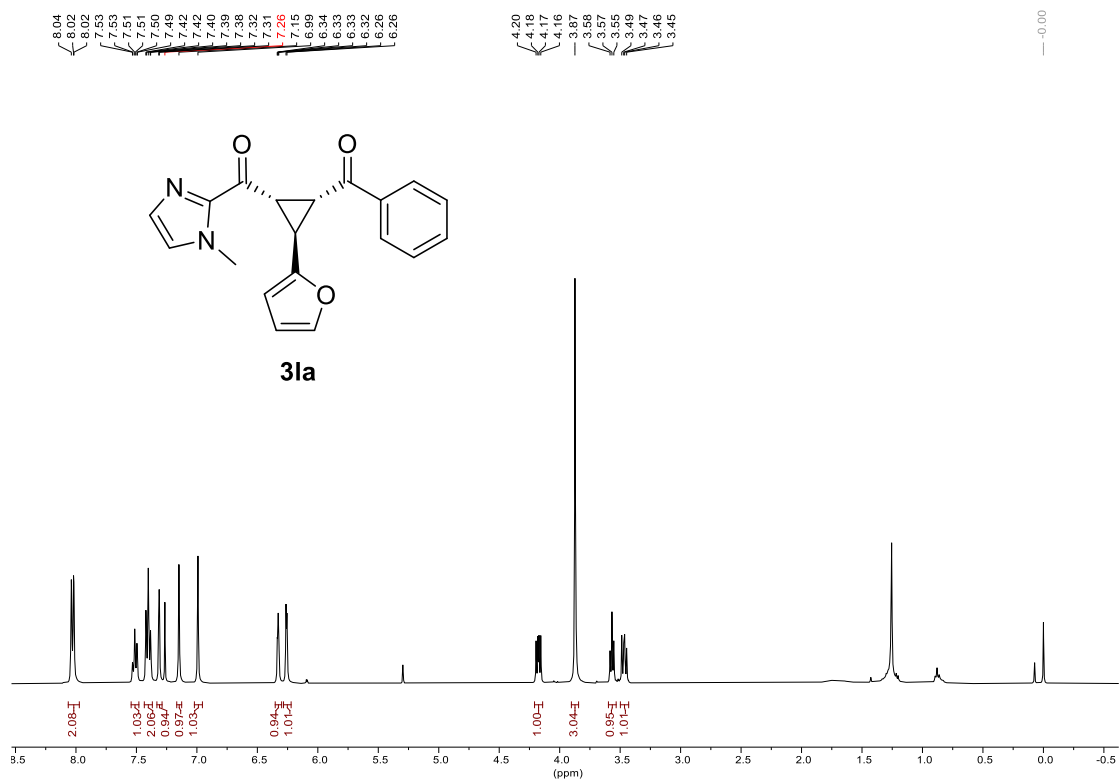

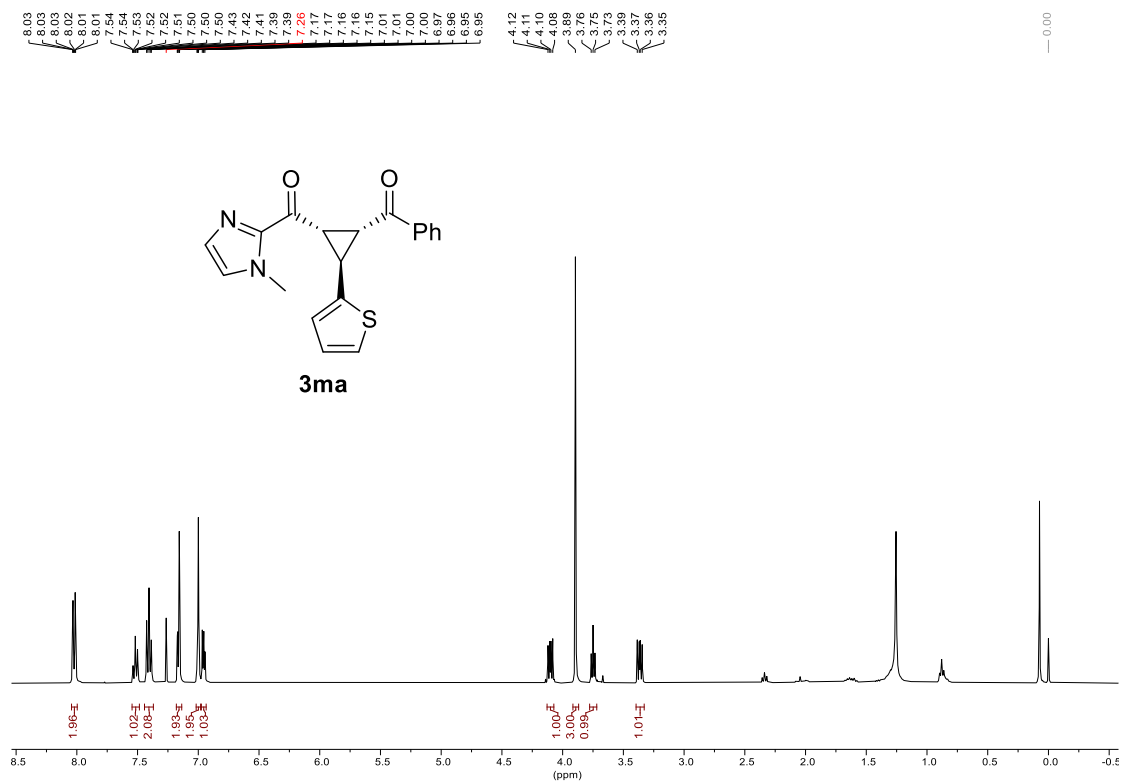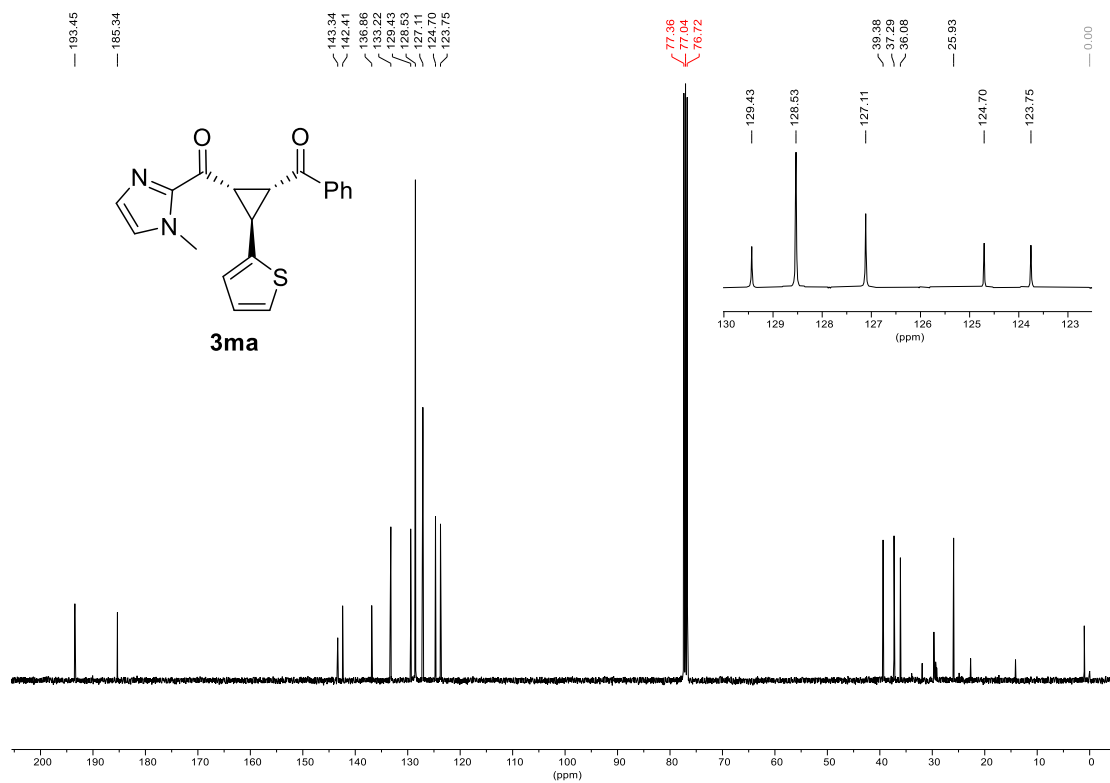

**Figure S13.** <sup>1</sup>H and <sup>13</sup>C NMR spectrum of **3ma**.

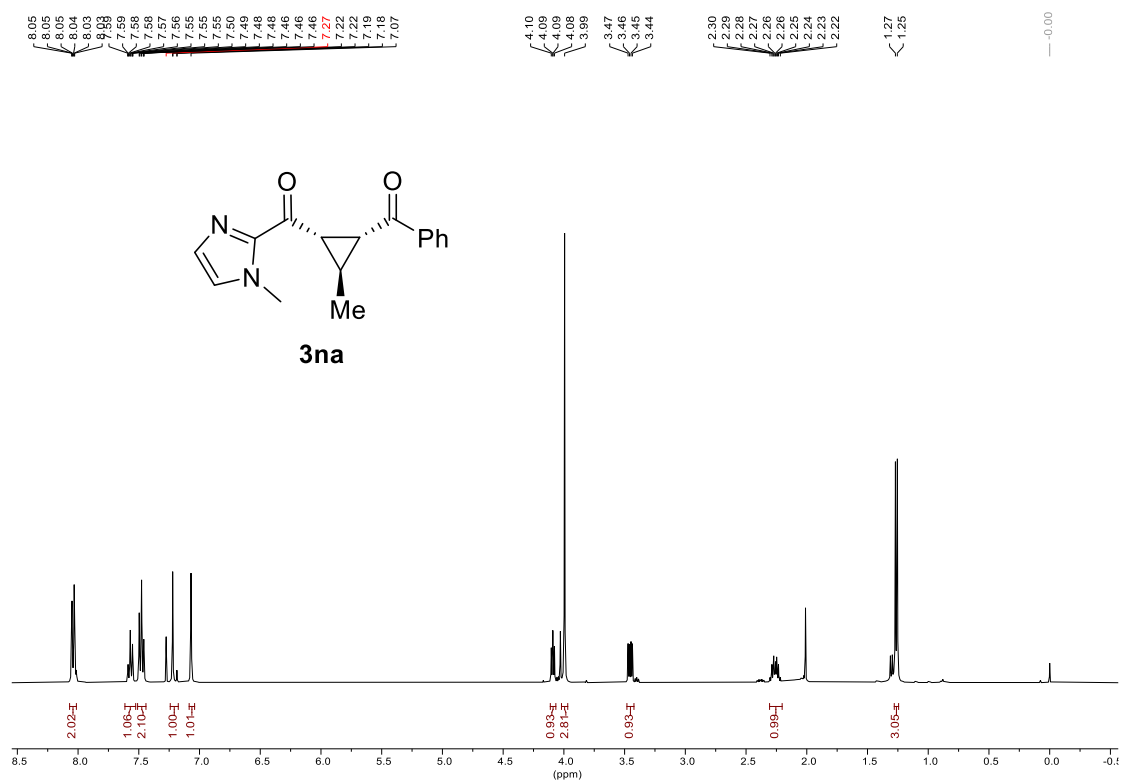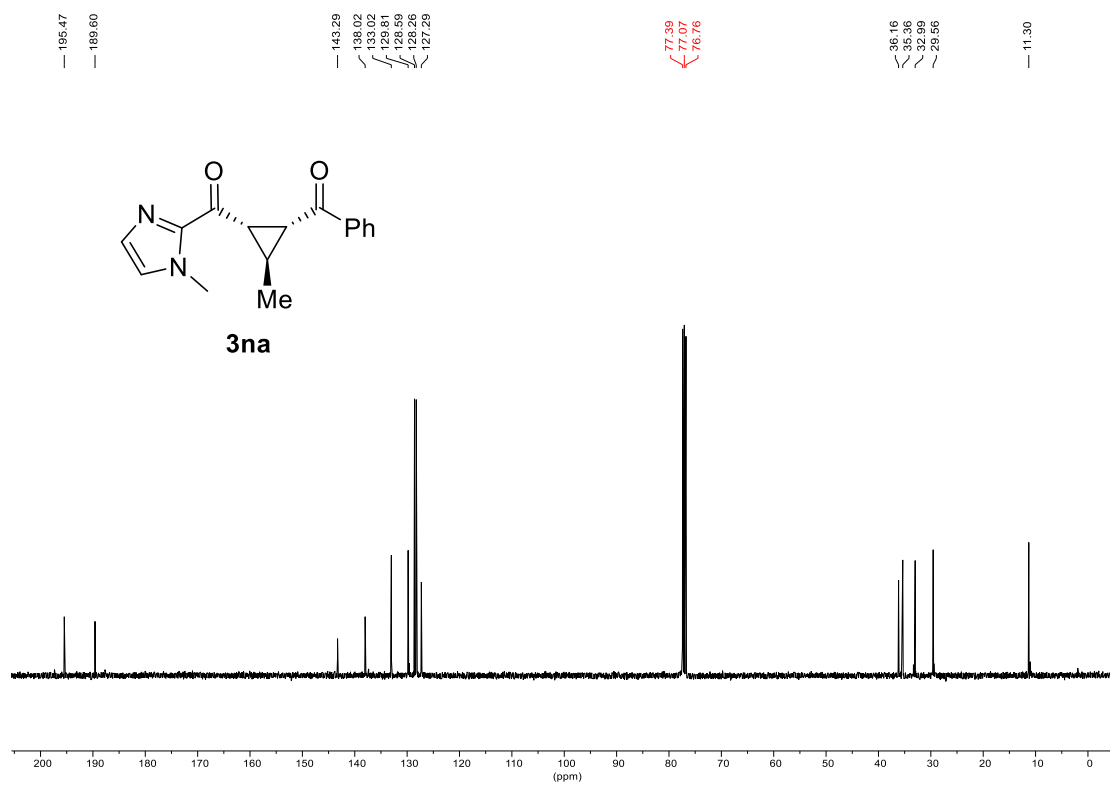

**Figure S14.** <sup>1</sup>H and <sup>13</sup>C NMR spectrum of **3na**.



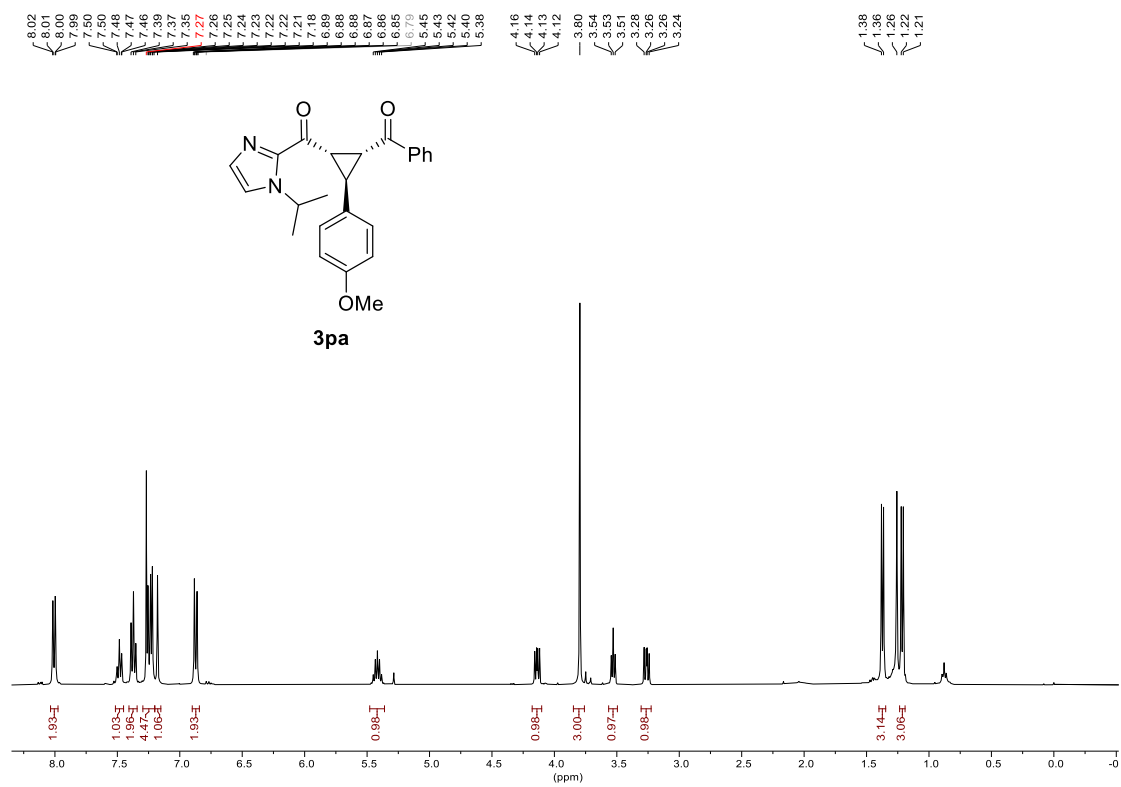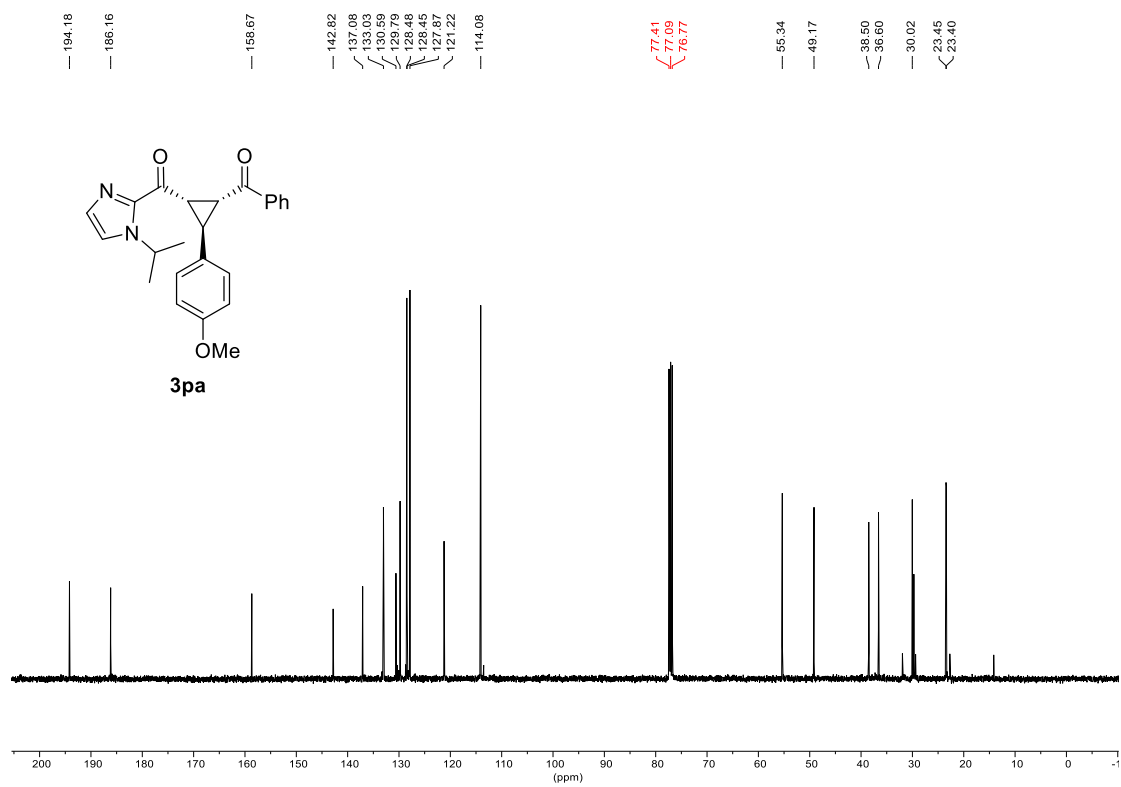

**Figure S16.** <sup>1</sup>H and <sup>13</sup>C NMR spectrum of **3pa**.

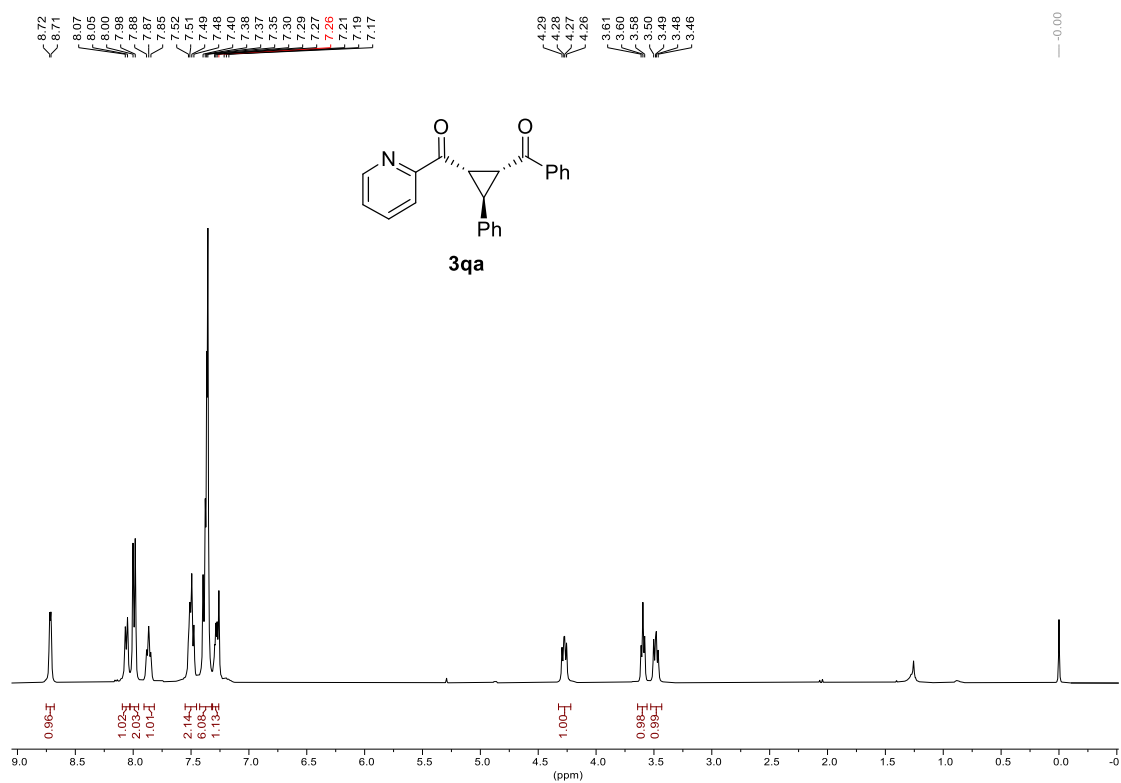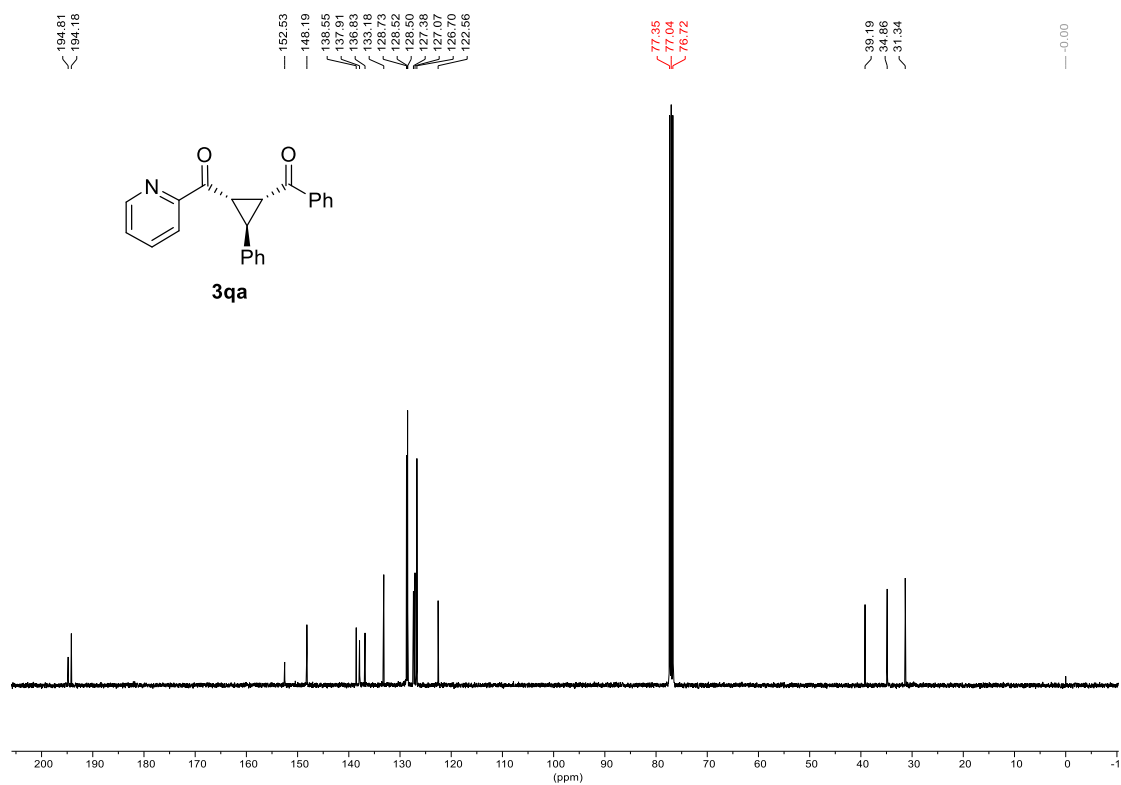

**Figure S17.** <sup>1</sup>H and <sup>13</sup>C NMR spectrum of **3qa**.





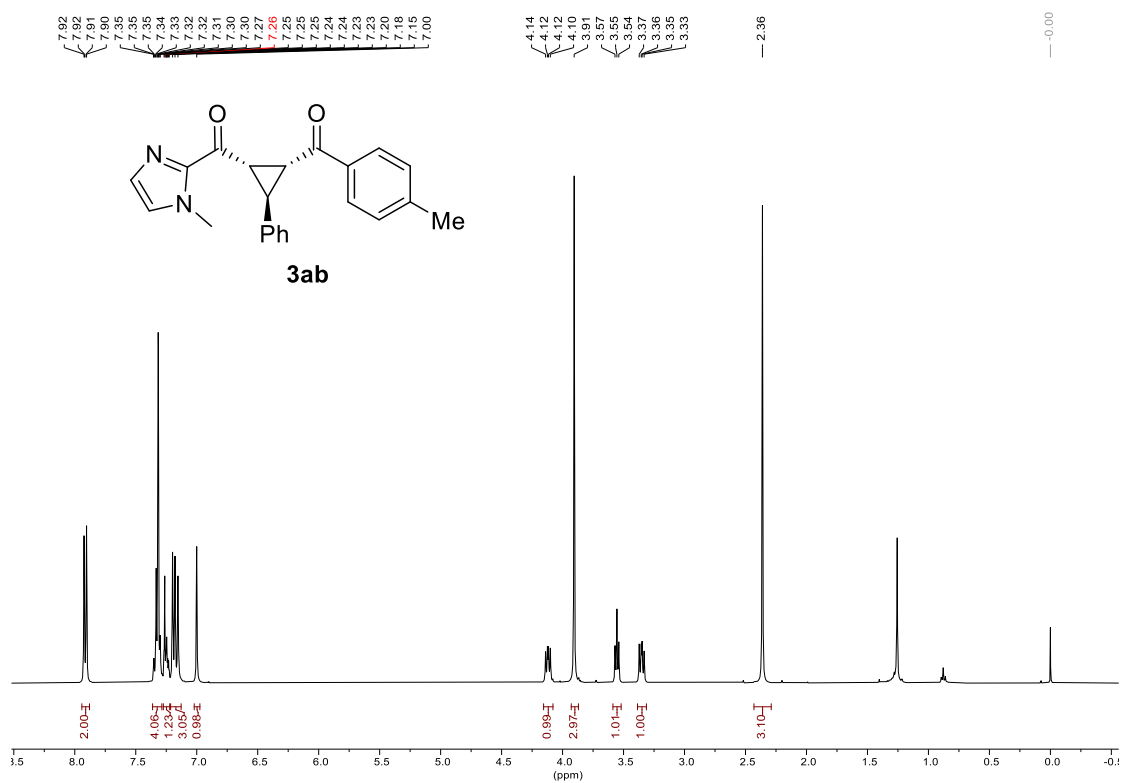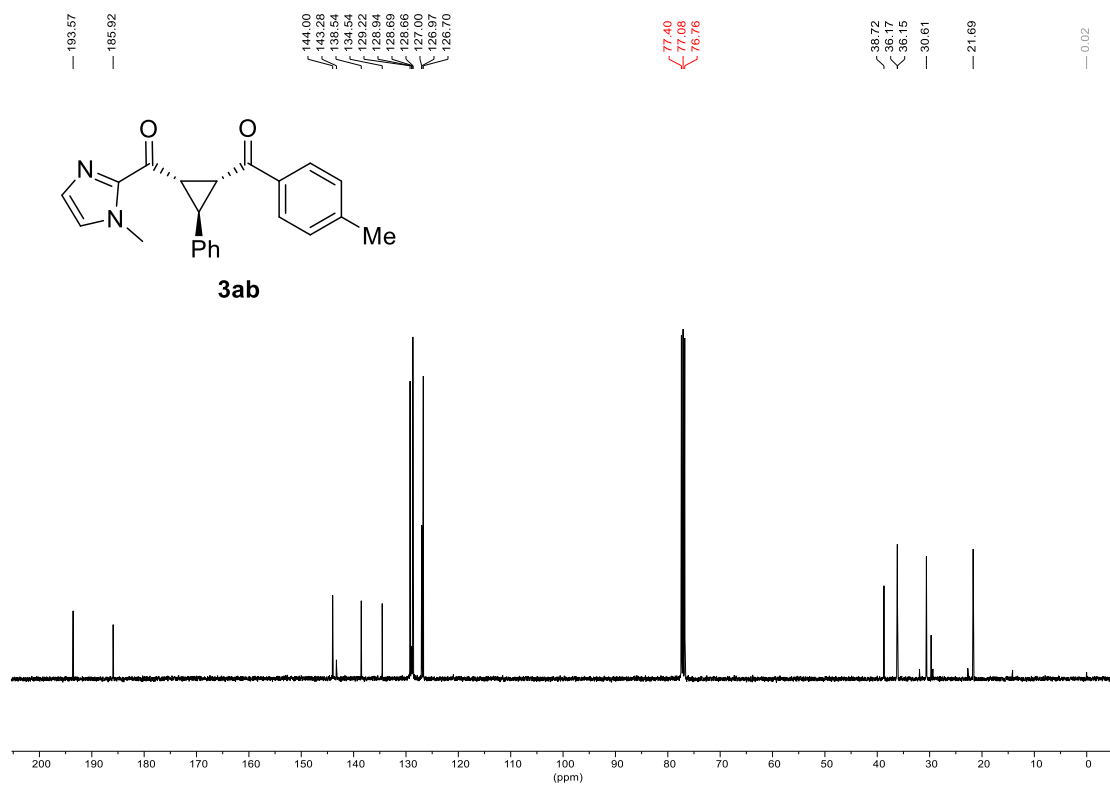

**Figure S19.** <sup>1</sup>H and <sup>13</sup>C NMR spectrum of **3ab**.

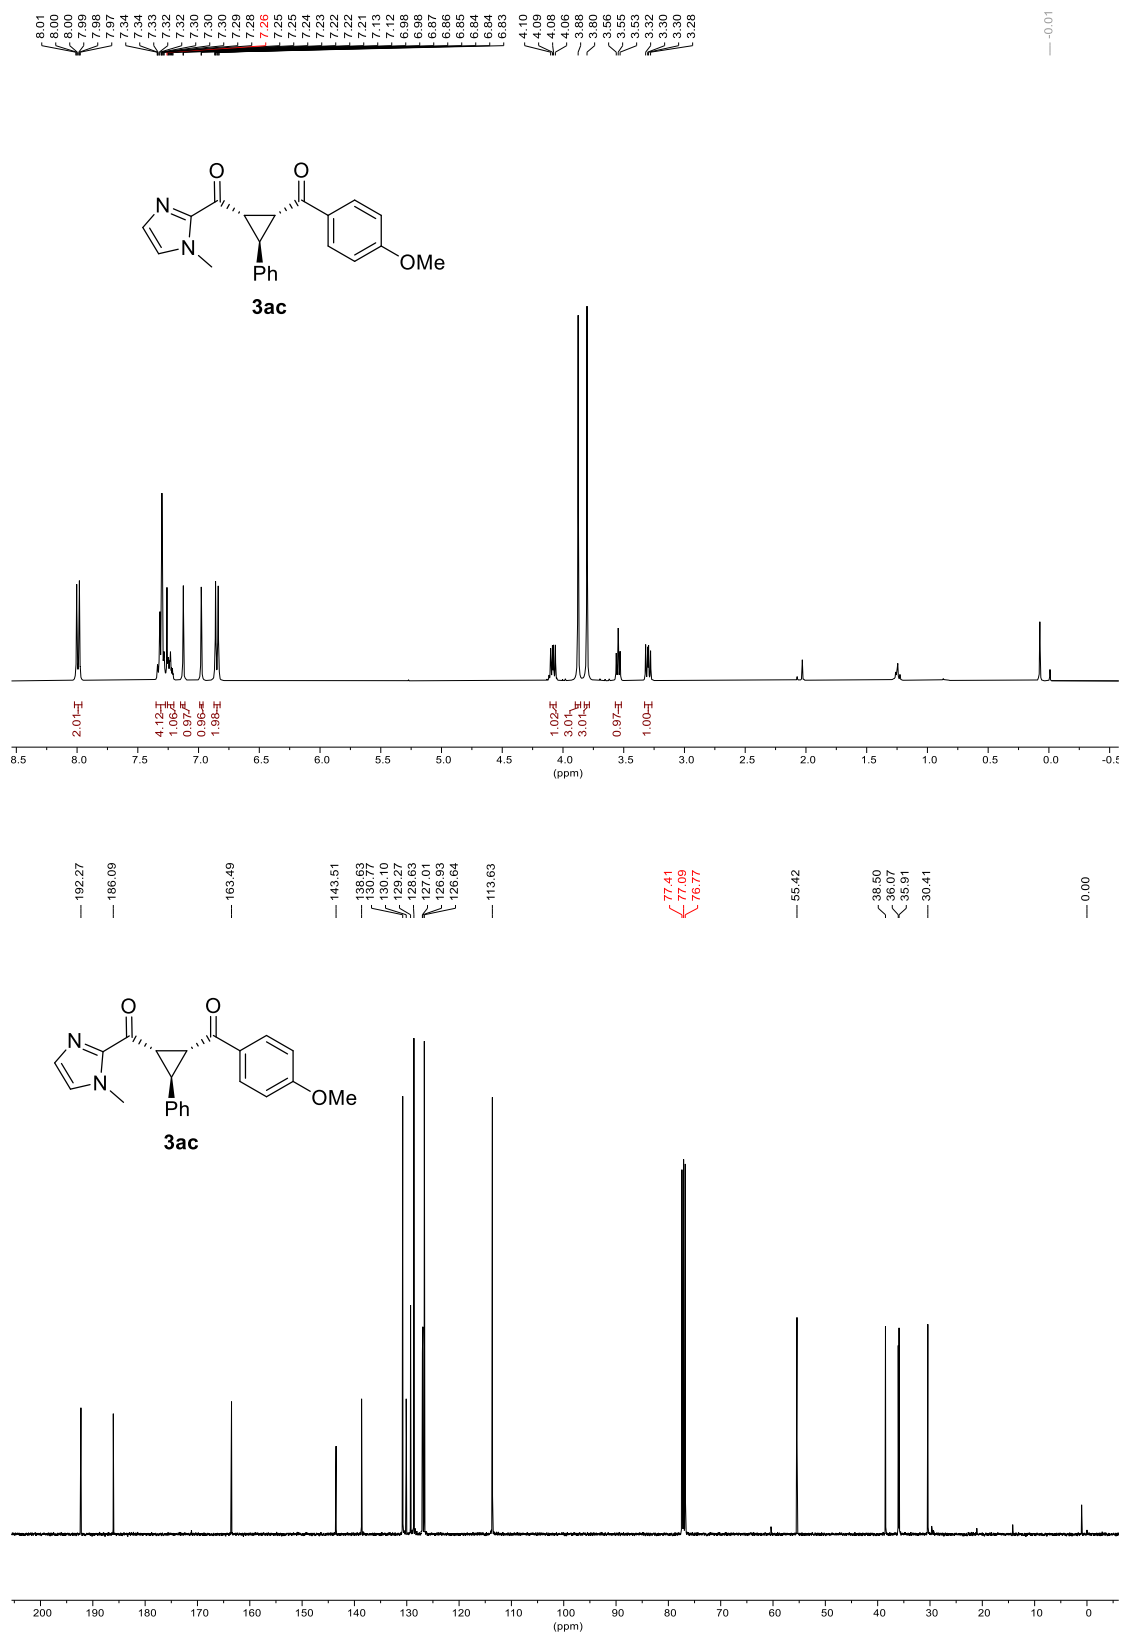

**Figure S20.** <sup>1</sup>H and <sup>13</sup>C NMR spectrum of **3ac**.

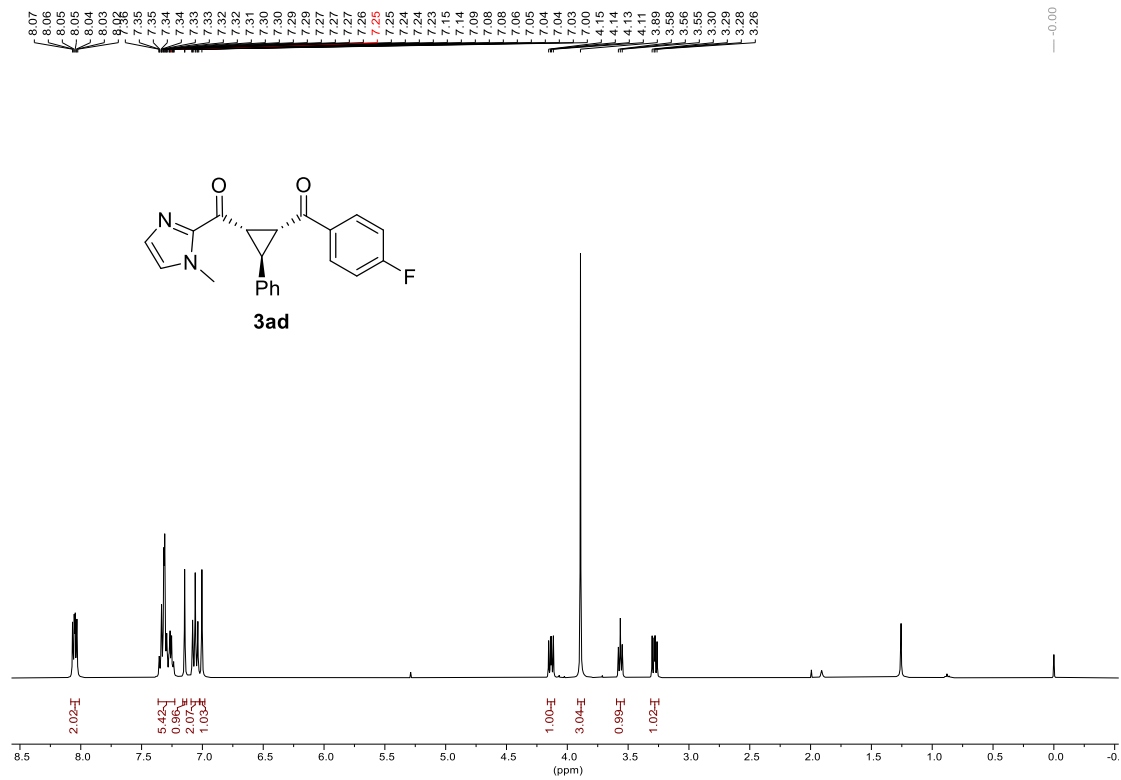

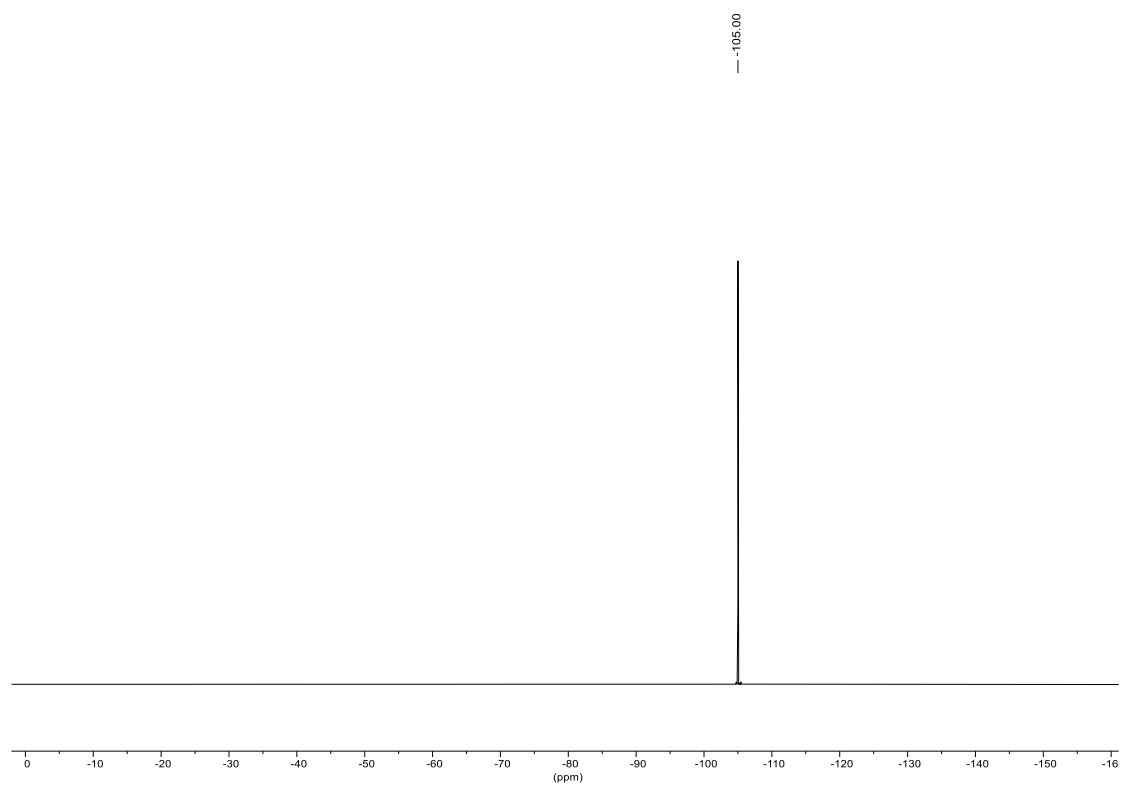

**Figure S21.**  $^1\text{H}$  and  $^{13}\text{C}$  NMR spectrum of **3ad**.

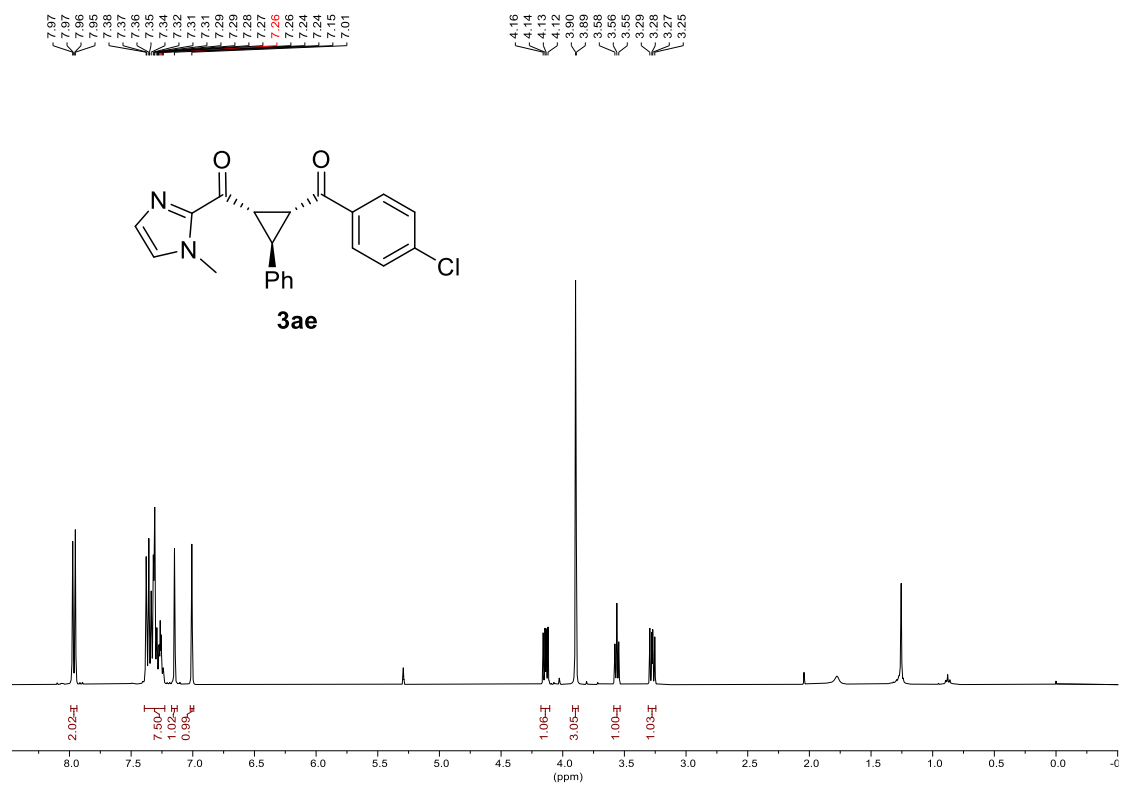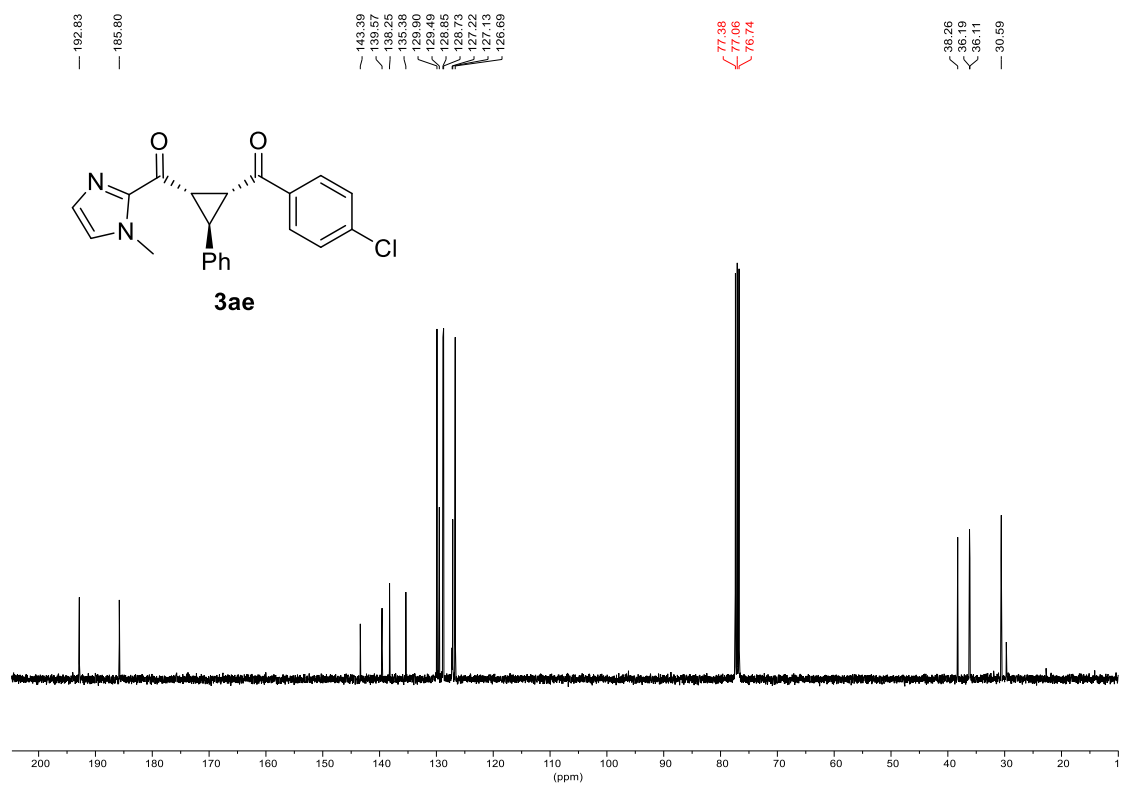

**Figure S22.** <sup>1</sup>H and <sup>13</sup>C NMR spectrum of **3ae**.

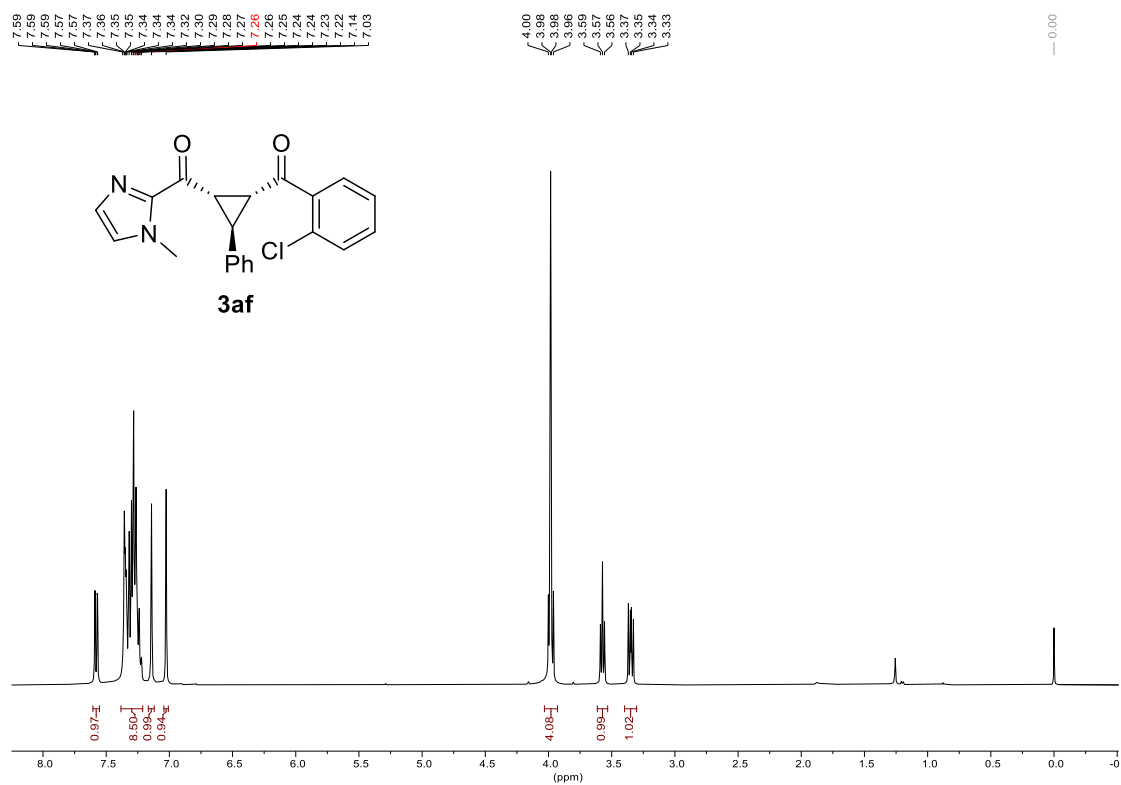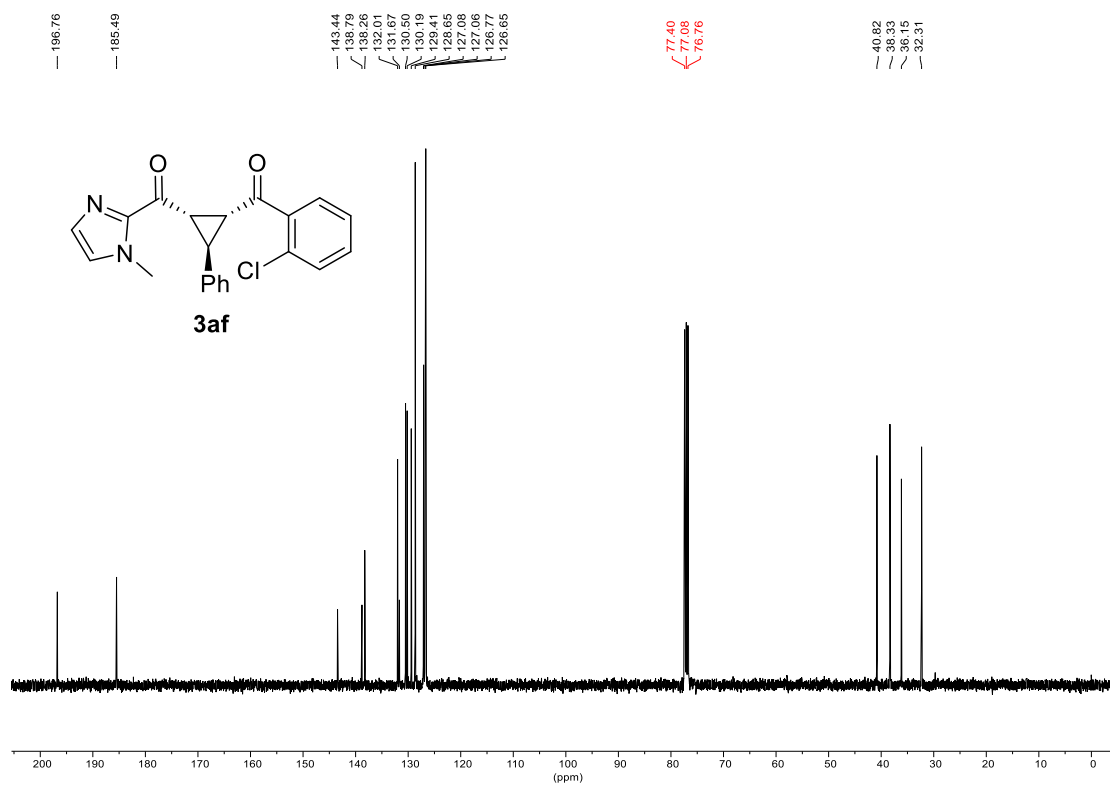

Figure S23.  $^1\text{H}$  and  $^{13}\text{C}$  NMR spectrum of **3af**.

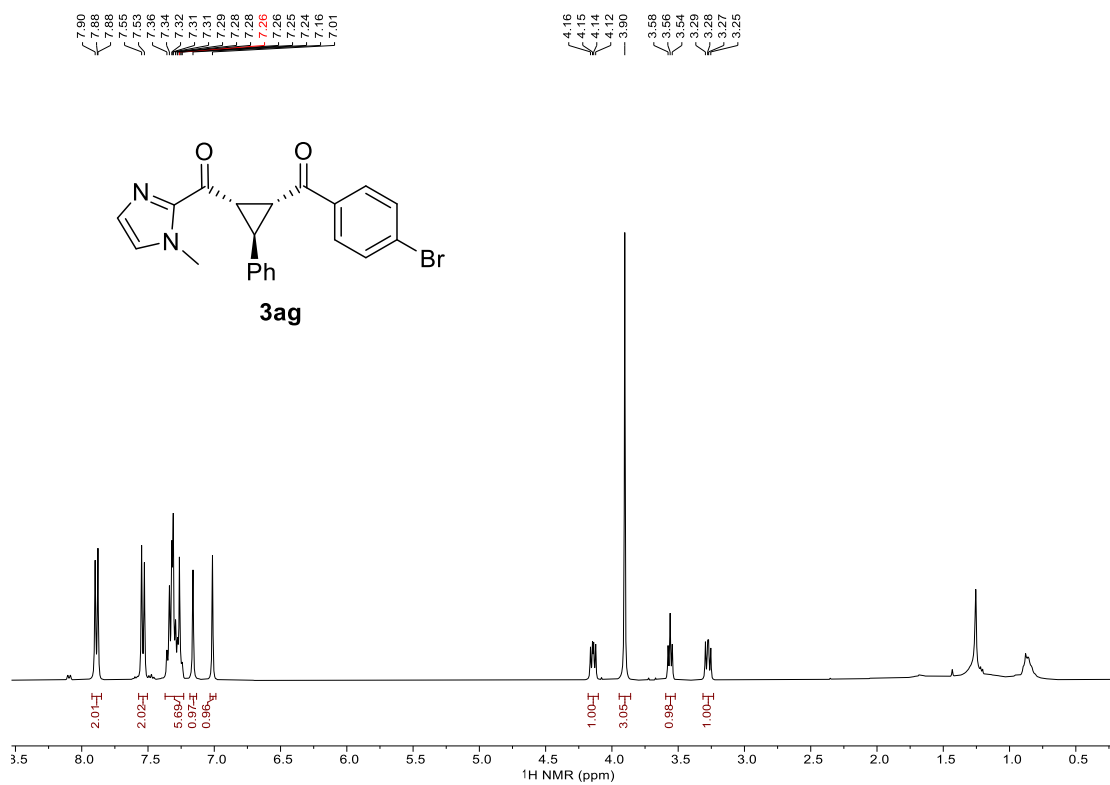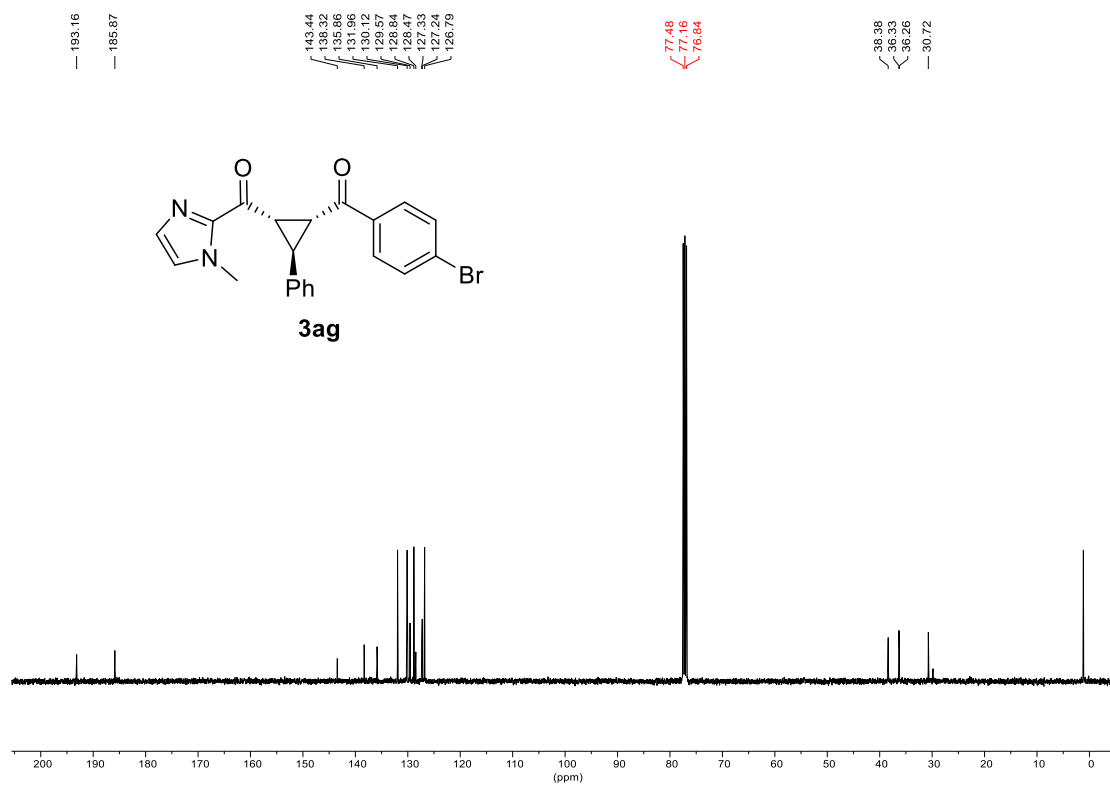

Figure S24.  $^1\text{H}$  and  $^{13}\text{C}$  NMR spectrum of **3ag**.



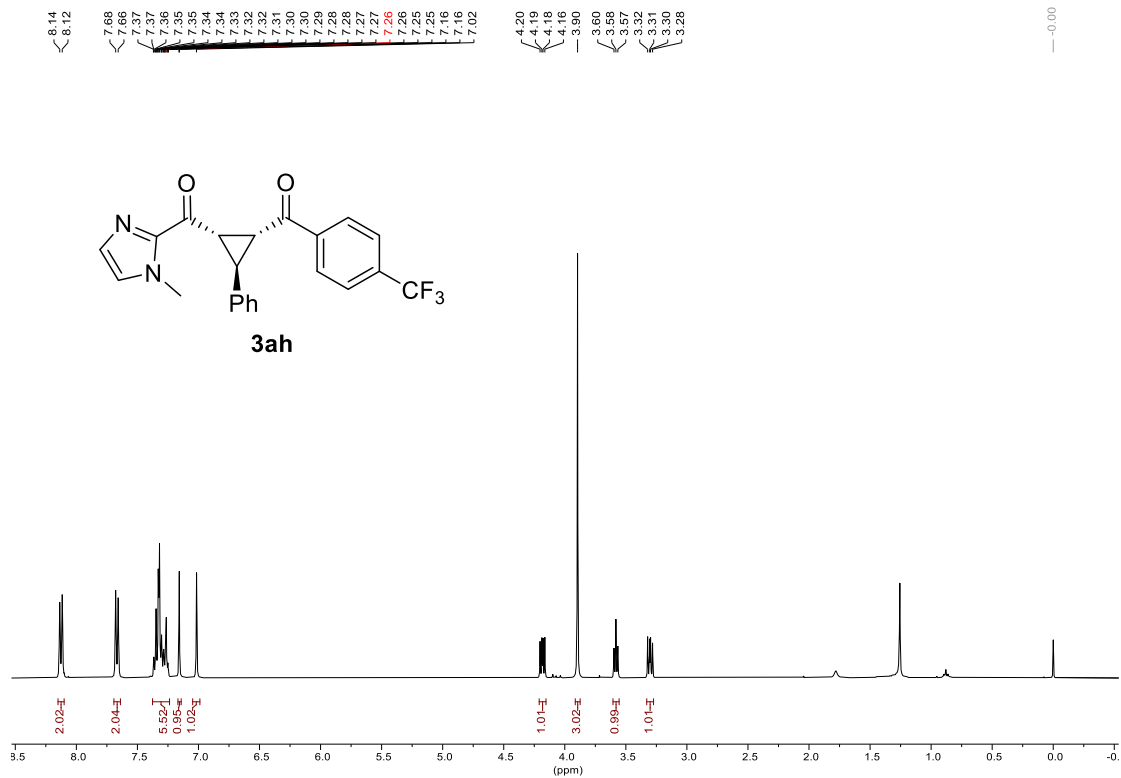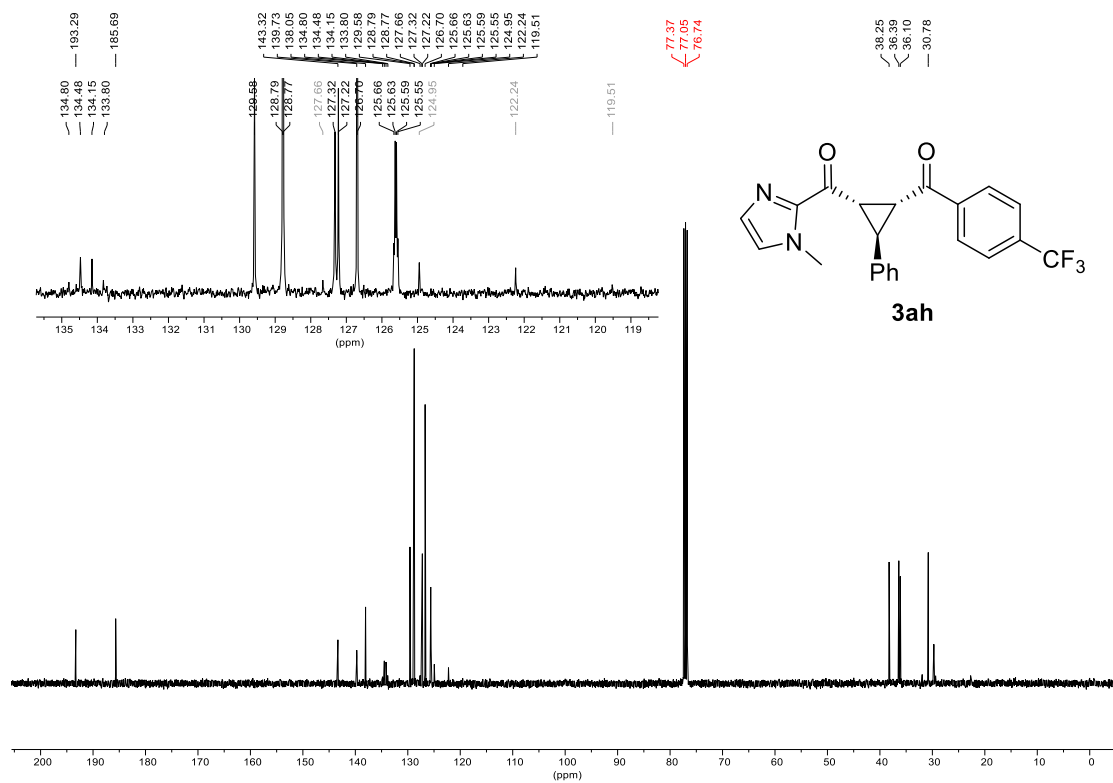

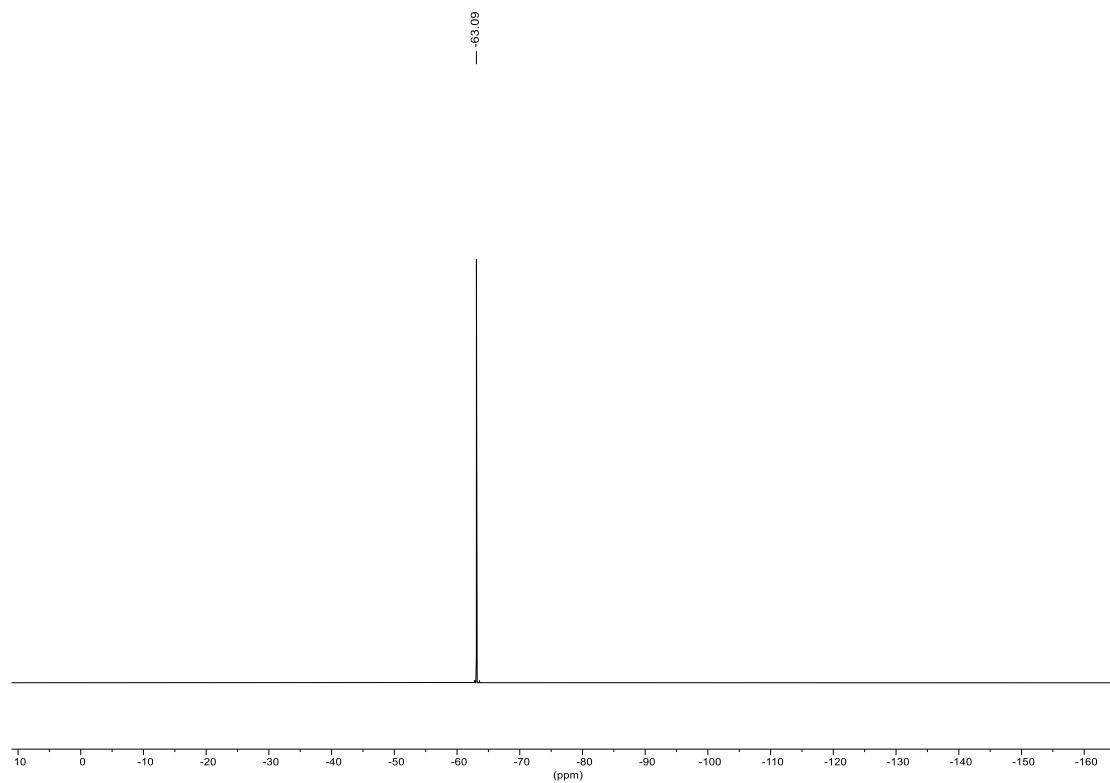

**Figure S25.**  $^1\text{H}$ ,  $^{13}\text{C}$  and  $^{19}\text{F}$  NMR spectrum of **3ah**.

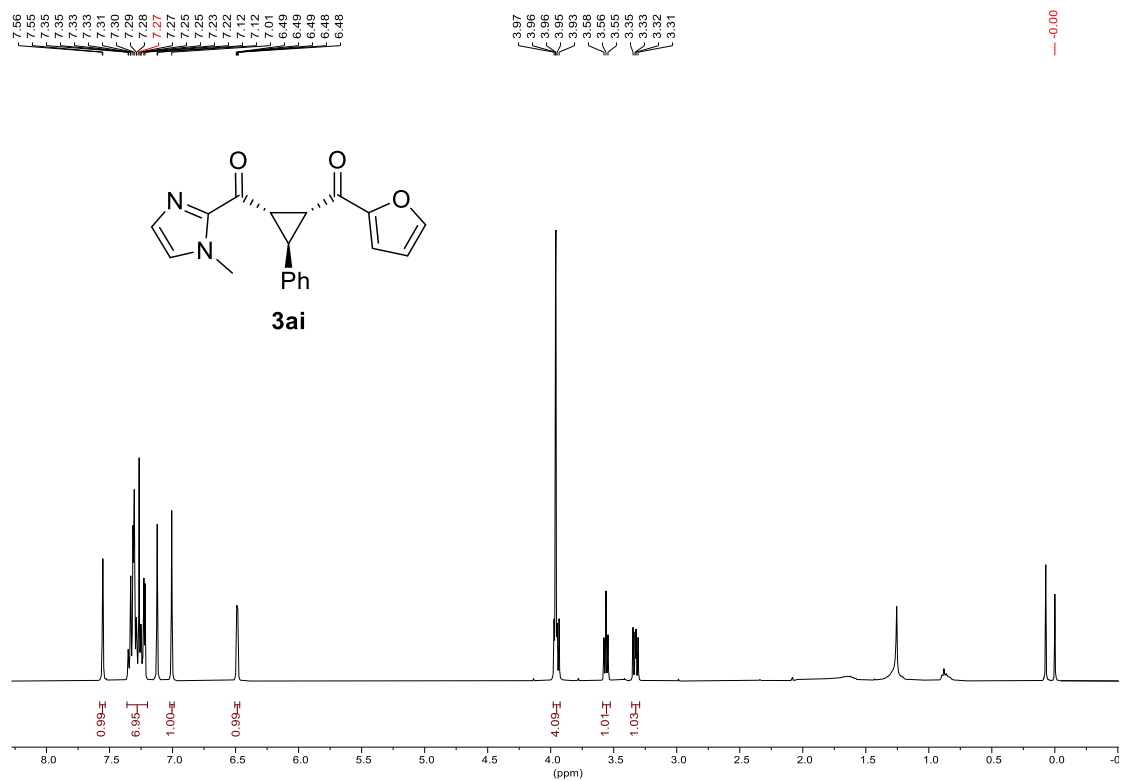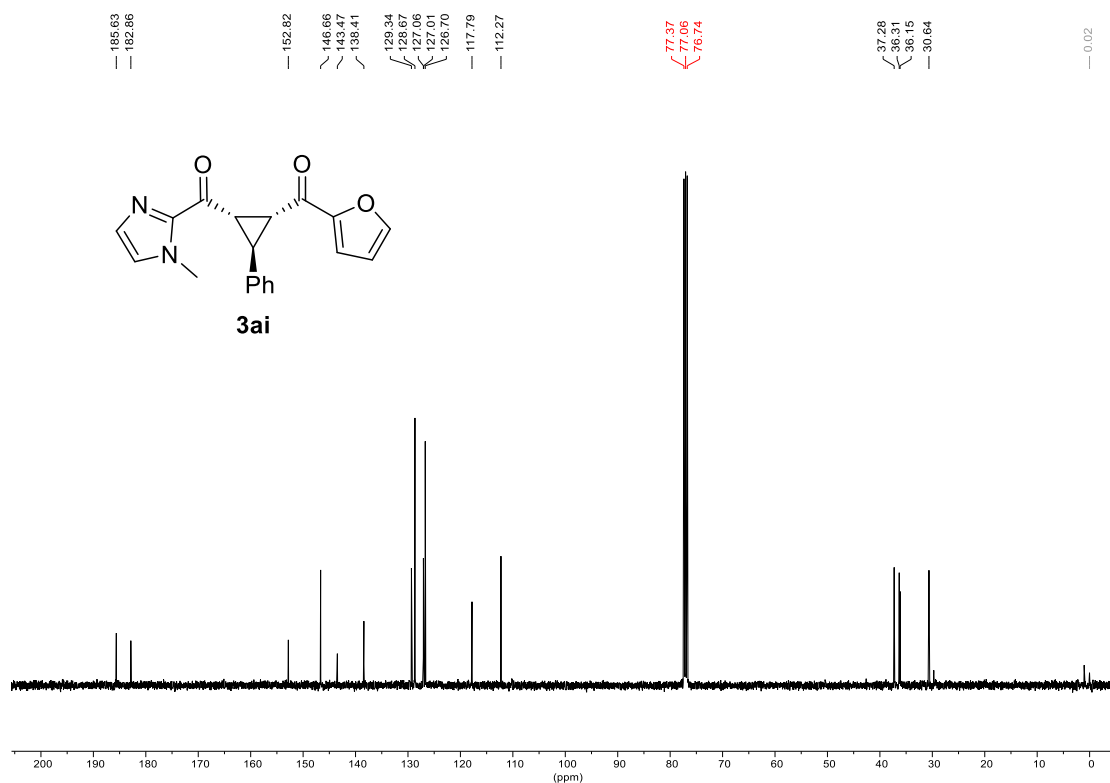

**Figure S26.** <sup>1</sup>H and <sup>13</sup>C NMR spectrum of **3ai**.

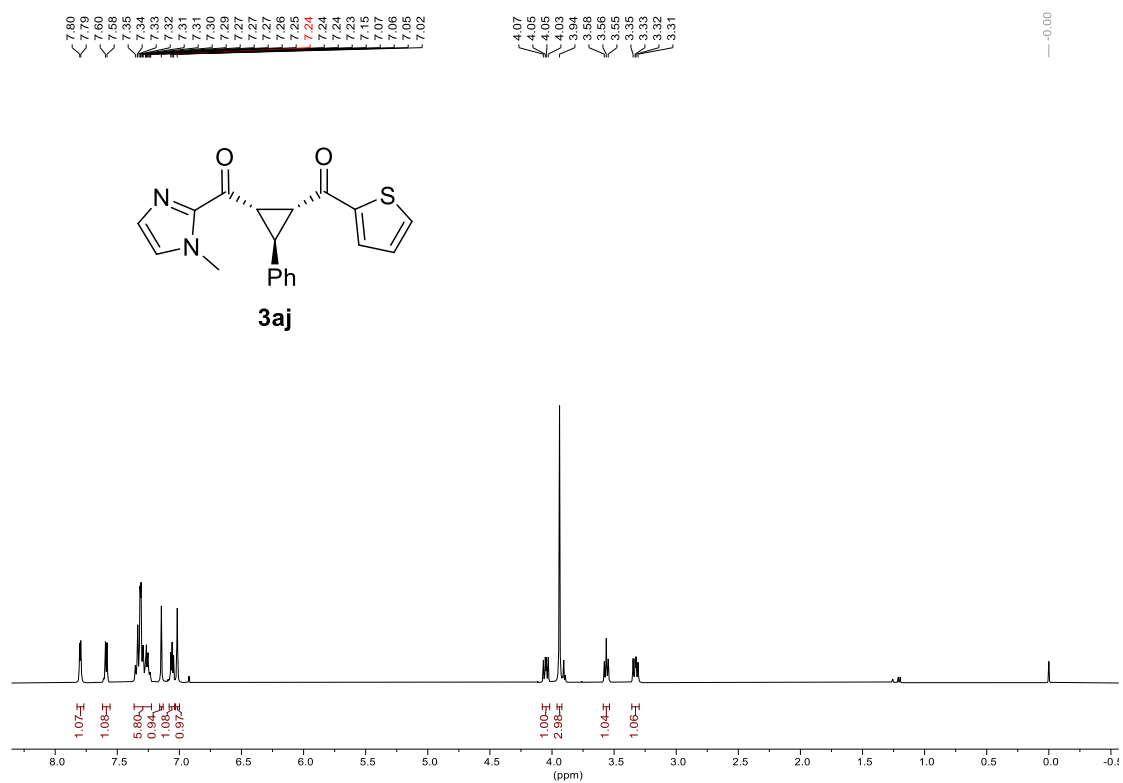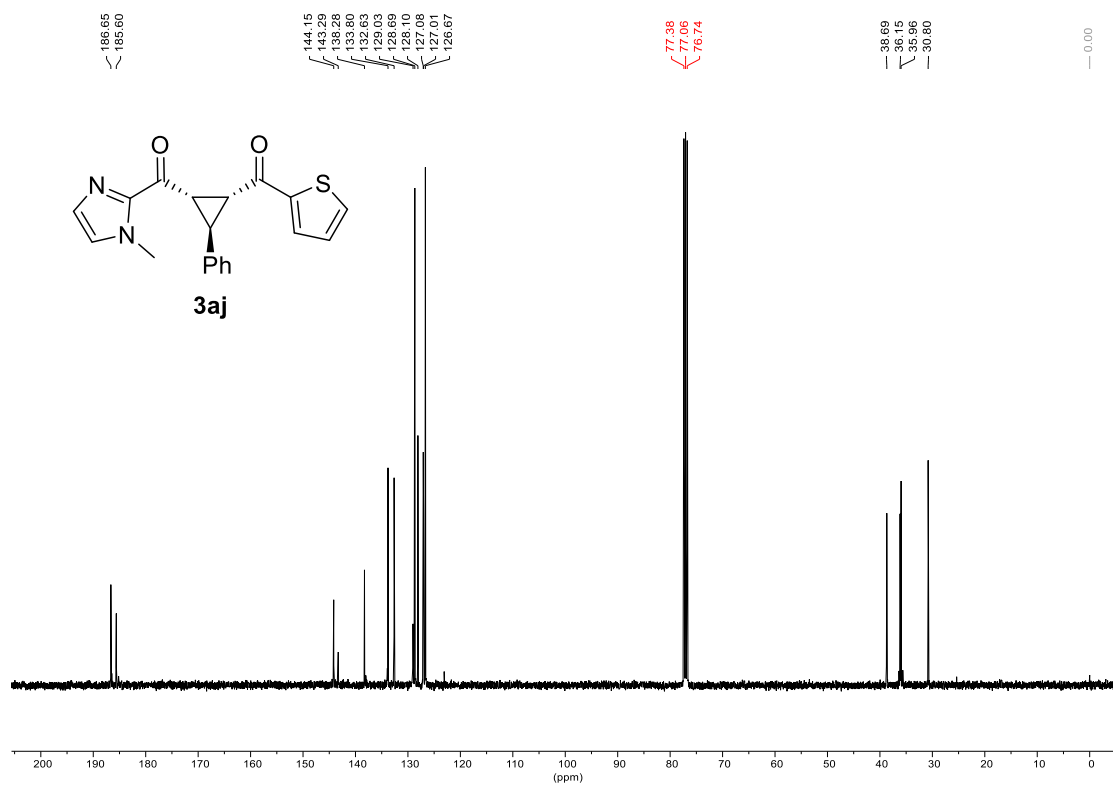

Figure S27.  $^1\text{H}$  and  $^{13}\text{C}$  NMR spectrum of **3aj**.

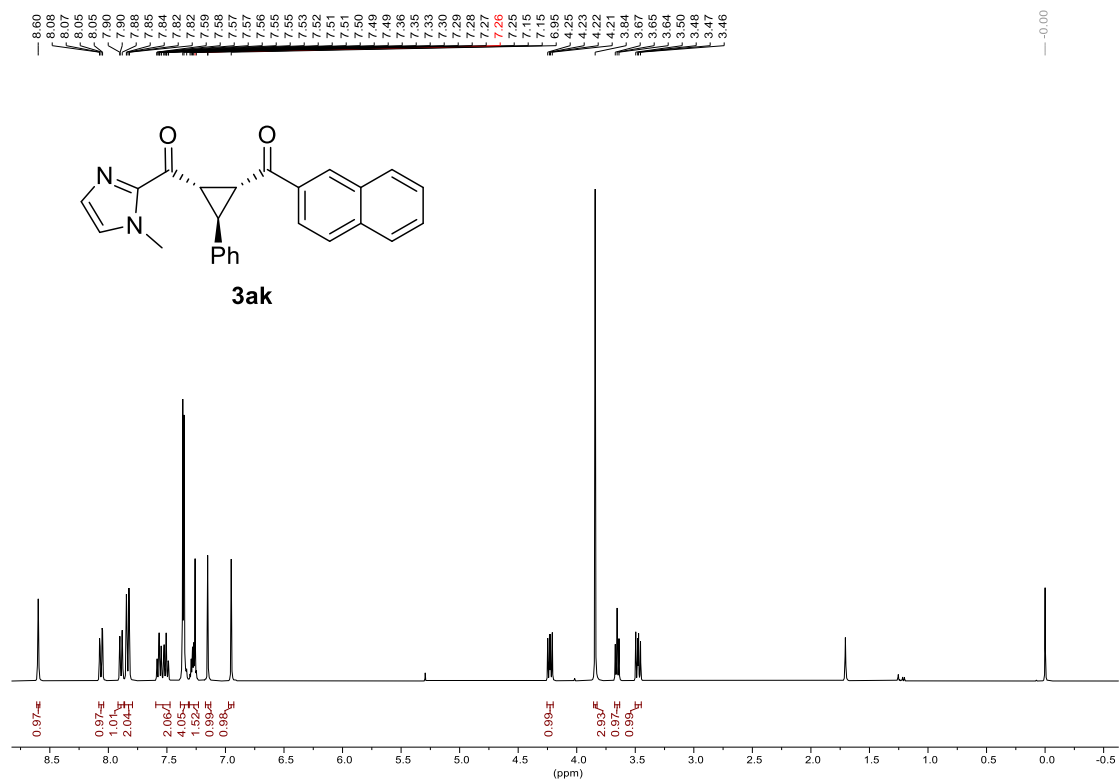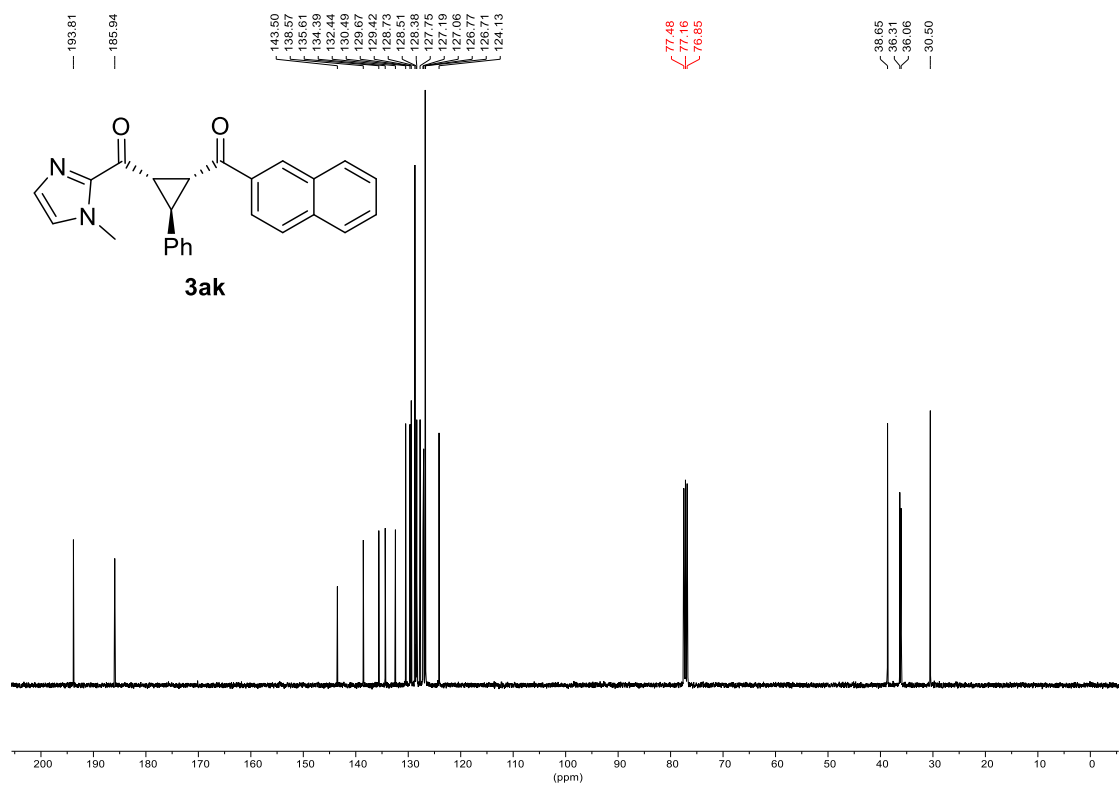

**Figure S28.** <sup>1</sup>H and <sup>13</sup>C NMR spectrum of **3ak**.

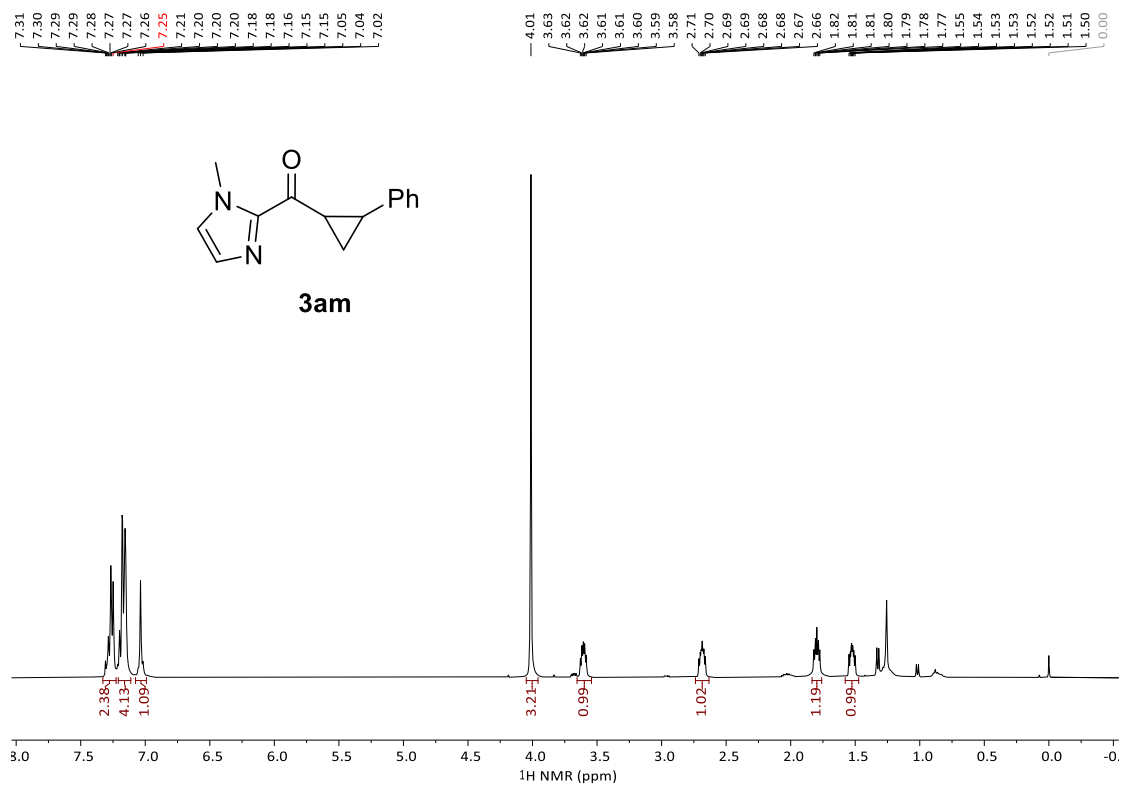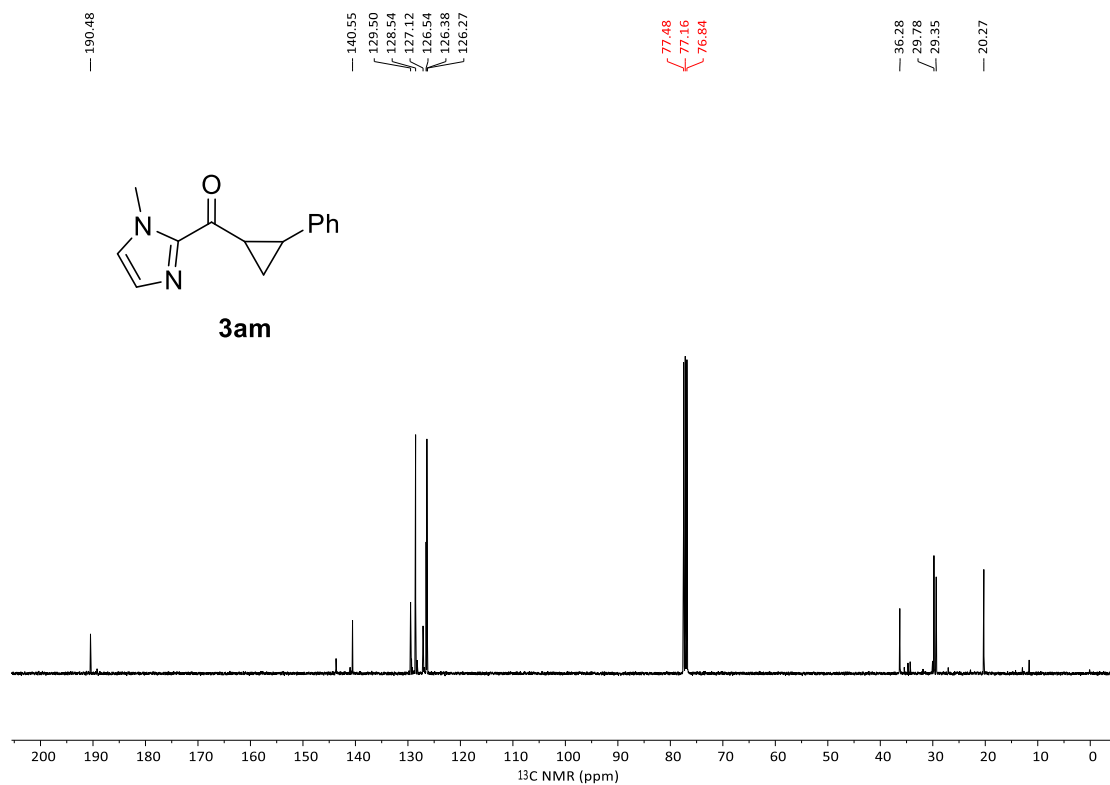

**Figure S29.**  $^1\text{H}$  and  $^{13}\text{C}$  NMR spectrum of **3am**.

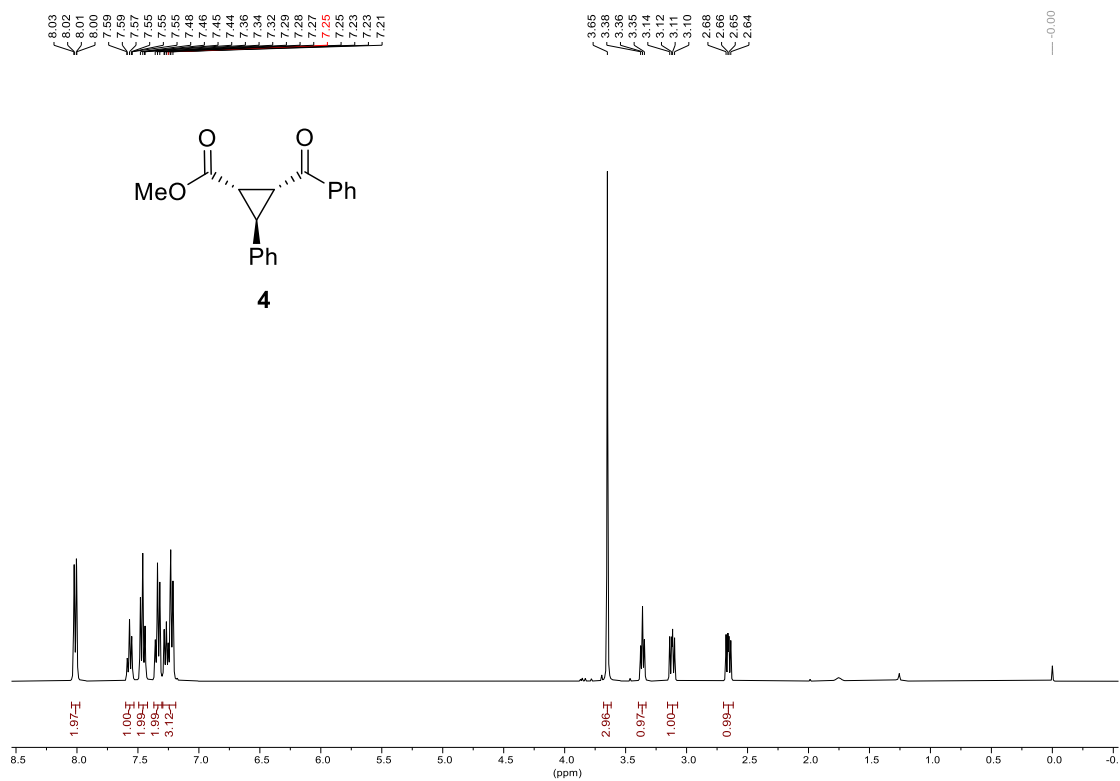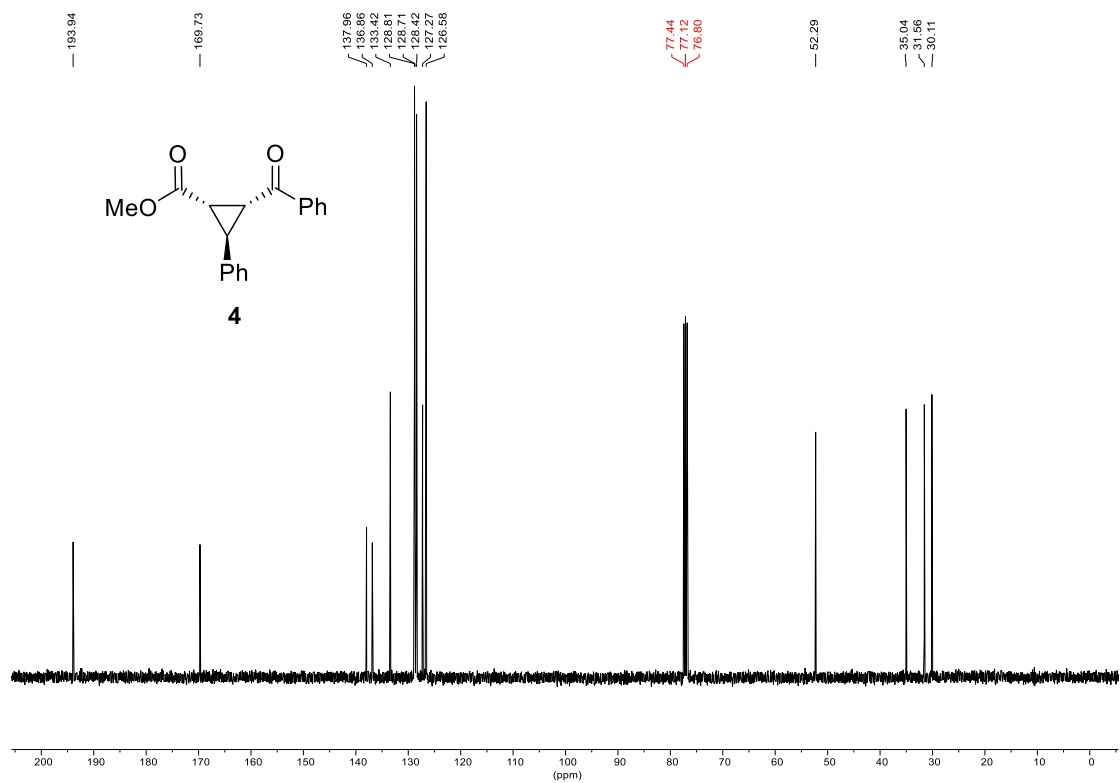

**Figure S30.**  $^1\text{H}$  and  $^{13}\text{C}$  NMR spectrum of **4**.

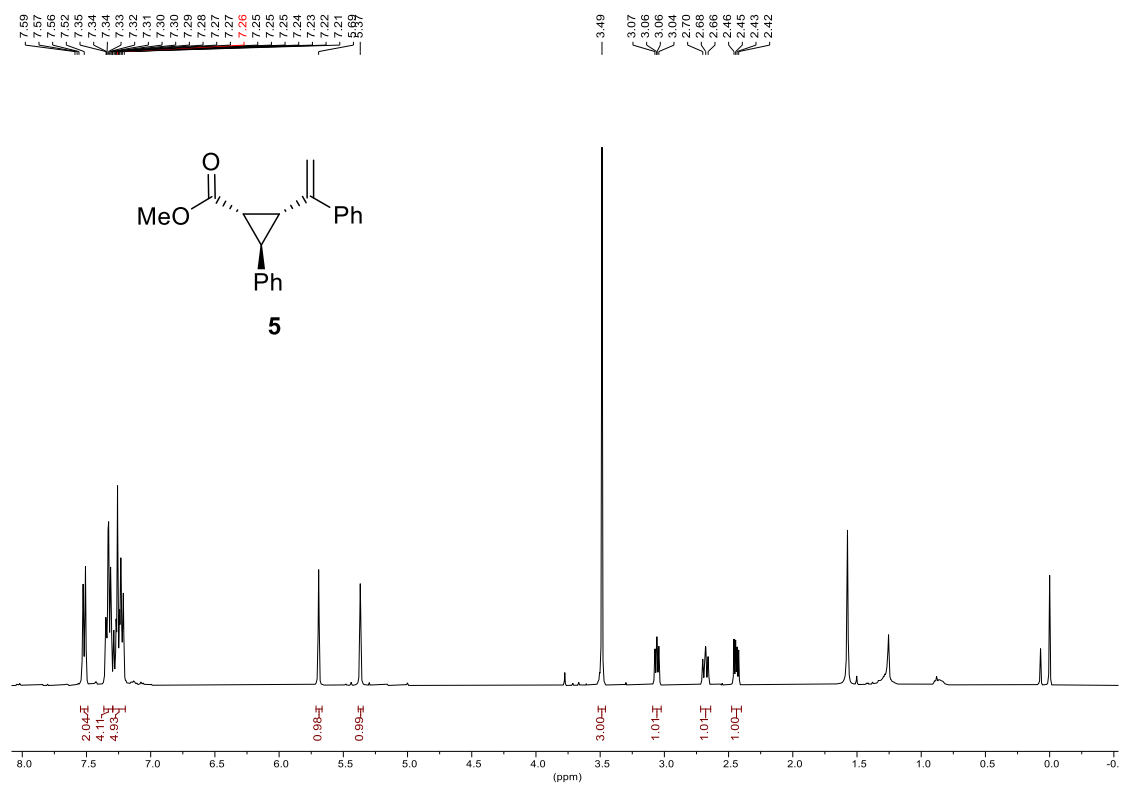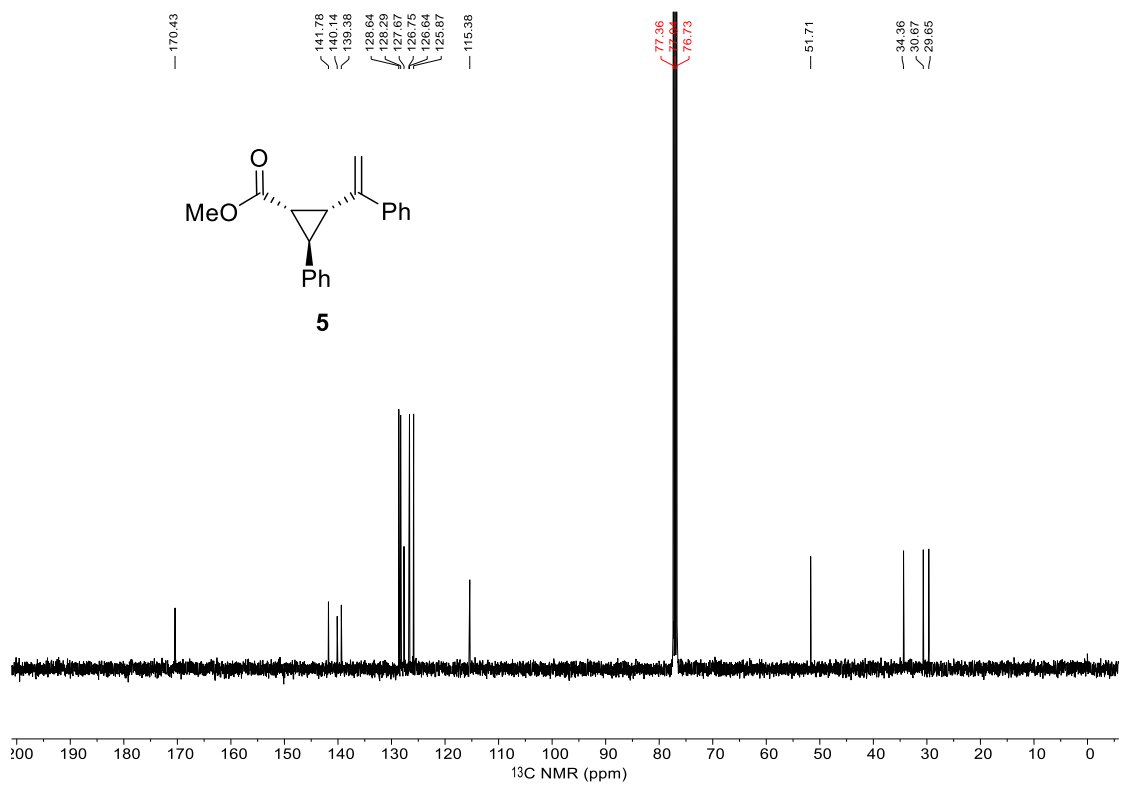

Figure S31. <sup>1</sup>H and <sup>13</sup>C NMR spectrum of 5.



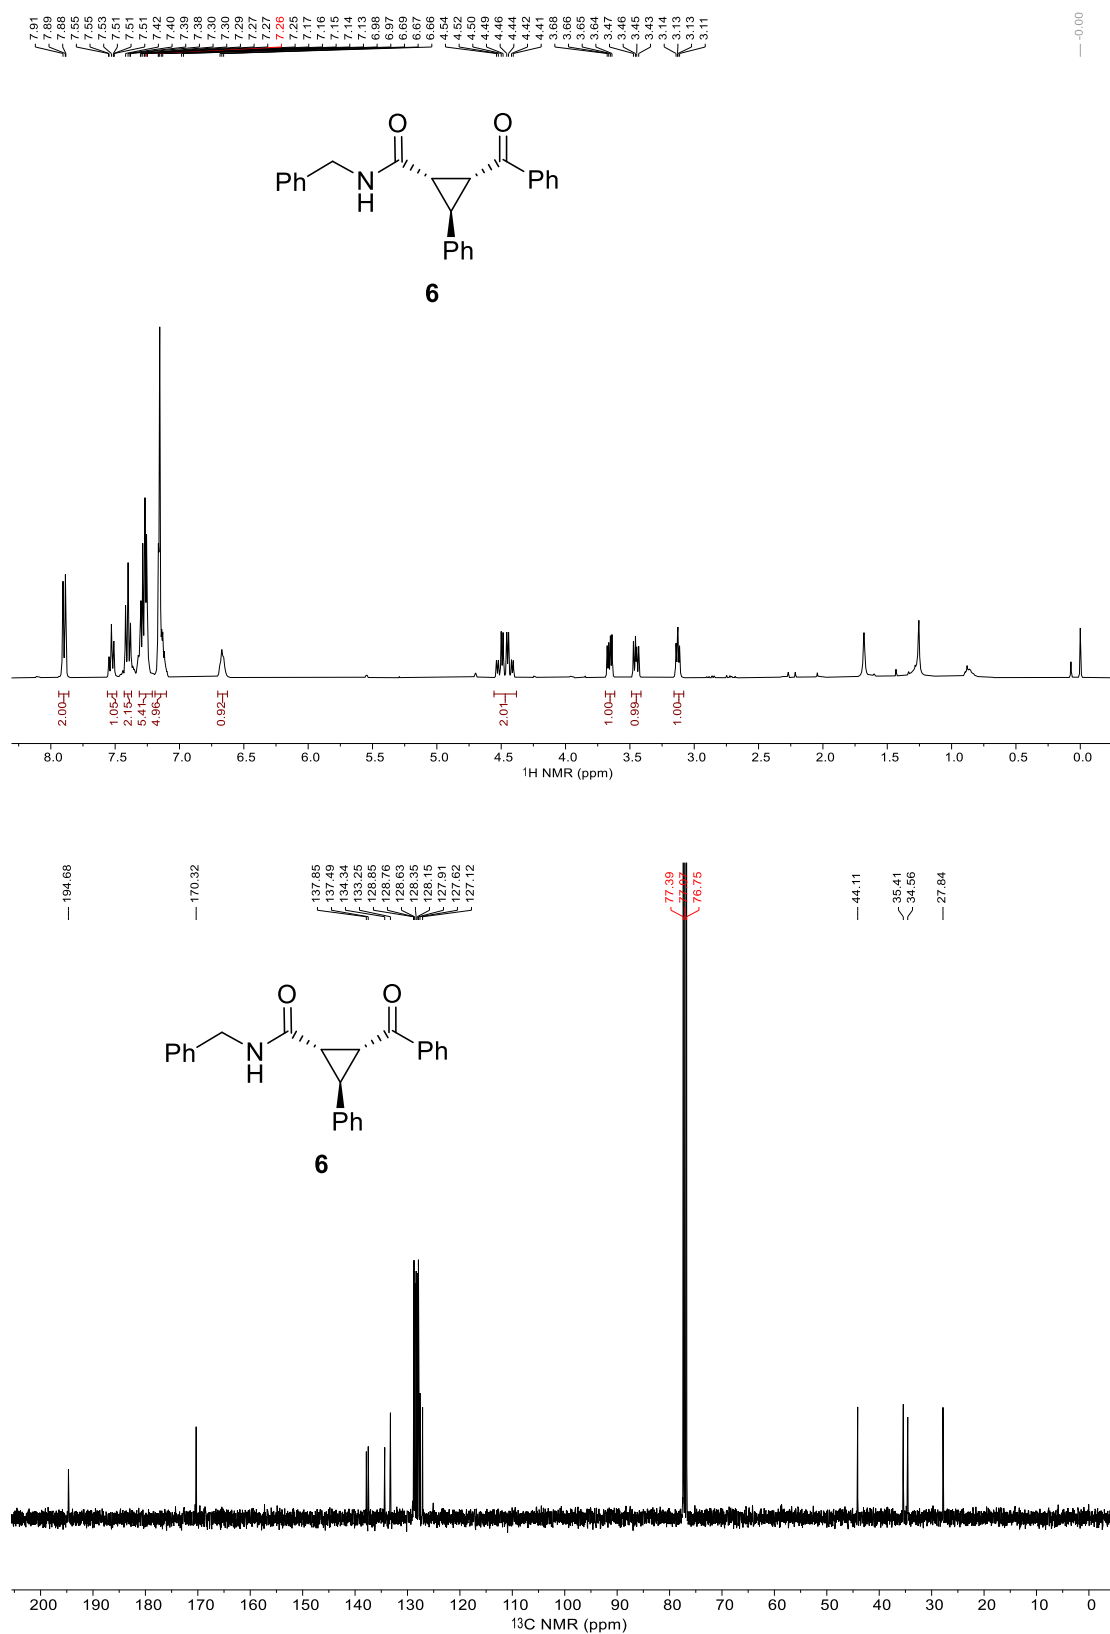

**Figure S32.** <sup>1</sup>H and <sup>13</sup>C NMR spectrum of **6**.

## 7. HPLC Traces on Chiral Stationary Phase

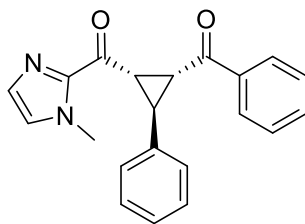

**3aa**

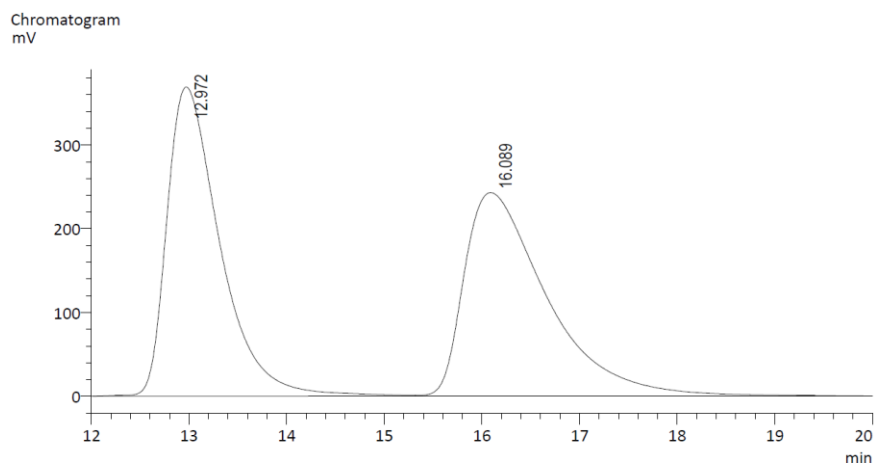

<Peak Table>

Detector A 254nm

| Peak# | Retention Time (min) | Area (mAU*min) | Height (mAU) | Area Ratio (%) |
|-------|----------------------|----------------|--------------|----------------|
| 1     | 12.972               | 13950907       | 369009       | 49.378         |
| 2     | 16.089               | 14302356       | 242882       | 50.622         |
| Total |                      | 28253263       | 611890       | 100.000        |

Chromatogram  
mV

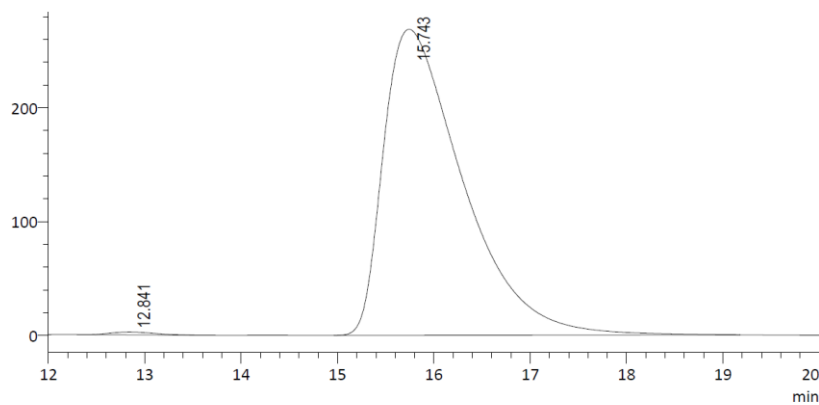

<Peak Table>

Detector A 254nm

| Peak# | Retention Time (min) | Area (mAU*min) | Height (mAU) | Area Ratio (%) |
|-------|----------------------|----------------|--------------|----------------|
| 1     | 12.841               | 79879          | 2552         | 0.515          |
| 2     | 15.743               | 15415557       | 268817       | 99.485         |
| Total |                      | 15495436       | 271369       | 100.000        |

**Figure S33.** HPLC traces of racemic **3aa** (reference) and chiral **3aa**. Area integration = 0.5: 99.5 (99% ee).

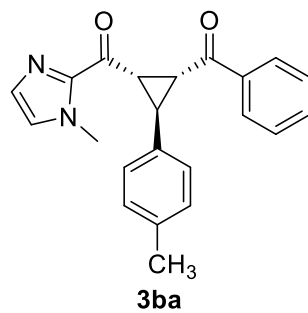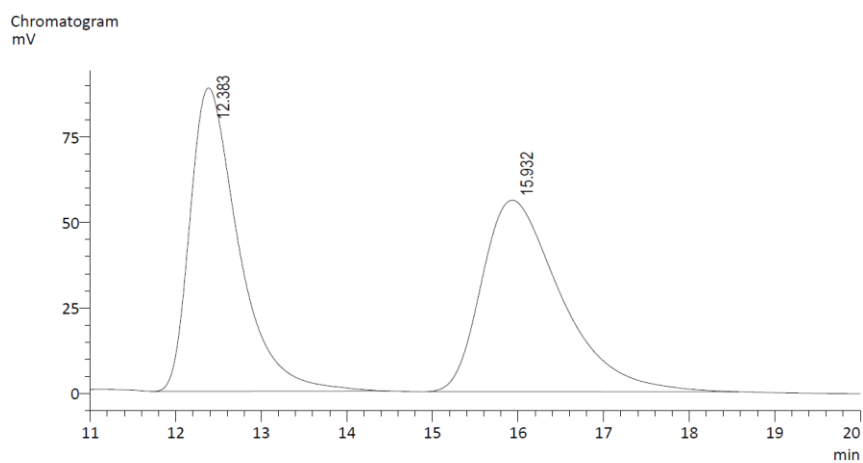

<Peak Table>  
Detector A 254nm

| Peak# | Retention Time (min) | Area (mAU*min) | Height (mAU) | Area Ratio (%) |
|-------|----------------------|----------------|--------------|----------------|
| 1     | 12.383               | 3497530        | 88685        | 49.269         |
| 2     | 15.932               | 3601323        | 55963        | 50.731         |
| Total |                      | 7098853        | 144648       | 100.000        |

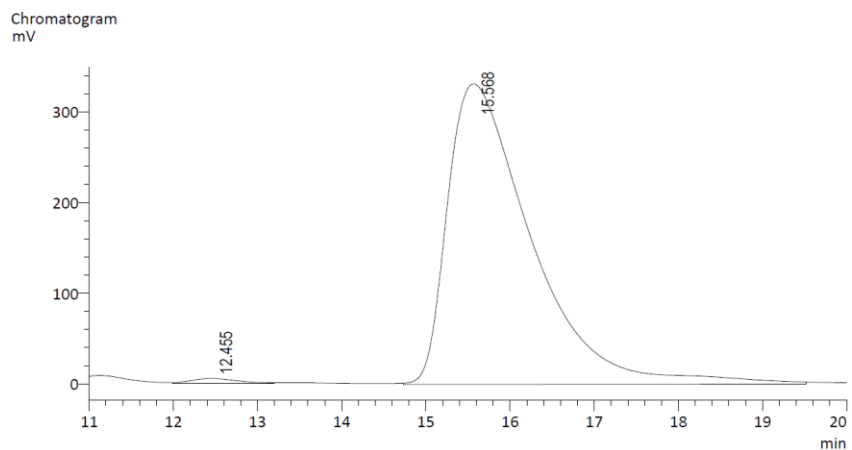

<Peak Table>  
Detector A 254nm

| Peak# | Retention Time (min) | Area (mAU*min) | Height (mAU) | Area Ratio (%) |
|-------|----------------------|----------------|--------------|----------------|
| 1     | 12.455               | 223859         | 5650         | 0.965          |
| 2     | 15.568               | 22966723       | 331248       | 99.035         |
| Total |                      | 23190582       | 336898       | 100.000        |

**Figure S34.** HPLC traces of racemic **3ba** (reference) and chiral **3ba**. Area integration = 1.0:99.0 (98% ee).

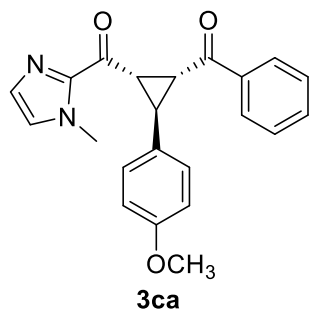

Chromatogram  
mV

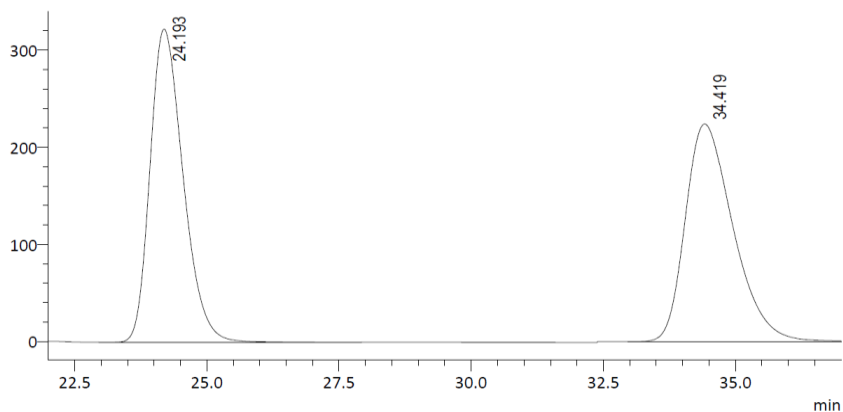

<Peak Table>

Detector A 254nm

| Peak# | Retention Time (min) | Area (mAU*min) | Height (mAU) | Area Ratio (%) |
|-------|----------------------|----------------|--------------|----------------|
| 1     | 24.193               | 14028512       | 322458       | 49.834         |
| 2     | 34.419               | 14121931       | 223963       | 50.166         |
| Total |                      | 28150443       | 546422       | 100.000        |

Chromatogram  
mV

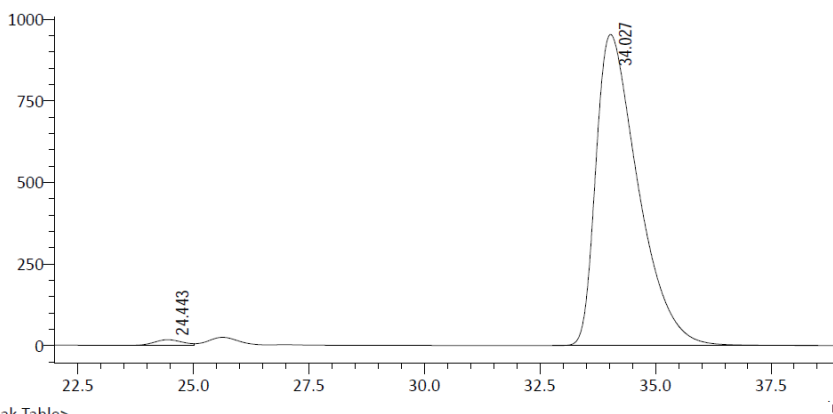

<Peak Table>

Detector A 254nm

| Peak# | Retention Time (min) | Area (mAU*min) | Height (mAU) | Area Ratio (%) |
|-------|----------------------|----------------|--------------|----------------|
| 1     | 24.443               | 722162         | 17067        | 1.179          |
| 2     | 34.027               | 60520440       | 953017       | 98.821         |
| Total |                      | 61242602       | 970085       | 100.000        |

**Figure S35.** HPLC traces of racemic **3ca** (reference) and chiral **3ca**. Area integration = 1.2:98.8 (98% ee).

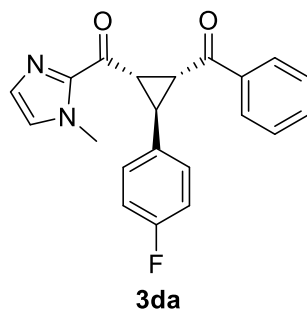

Chromatogram  
mV

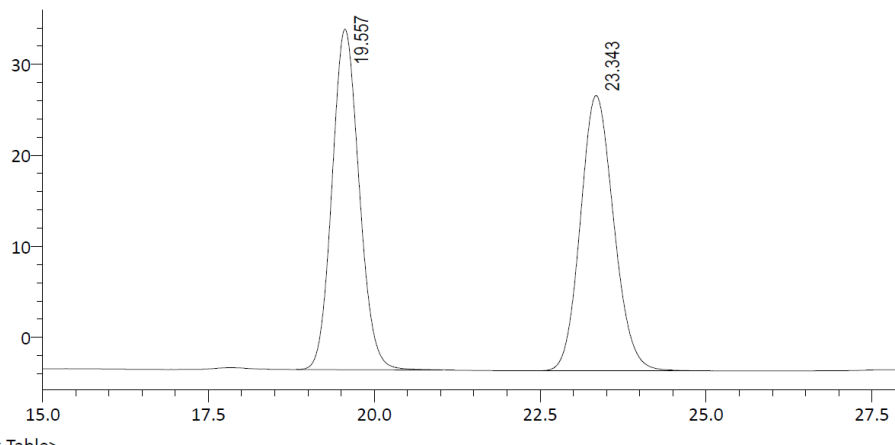

<Peak Table>  
Detector A 254nm

| Peak# | Retention Time (min) | Area (mAU*min) | Height (mAU) | Area Ratio (%) |
|-------|----------------------|----------------|--------------|----------------|
| 1     | 19.557               | 1061930        | 37418        | 50.094         |
| 2     | 23.343               | 1057943        | 30260        | 49.906         |
| Total |                      | 2119873        | 67677        | 100.000        |

Chromatogram  
mV

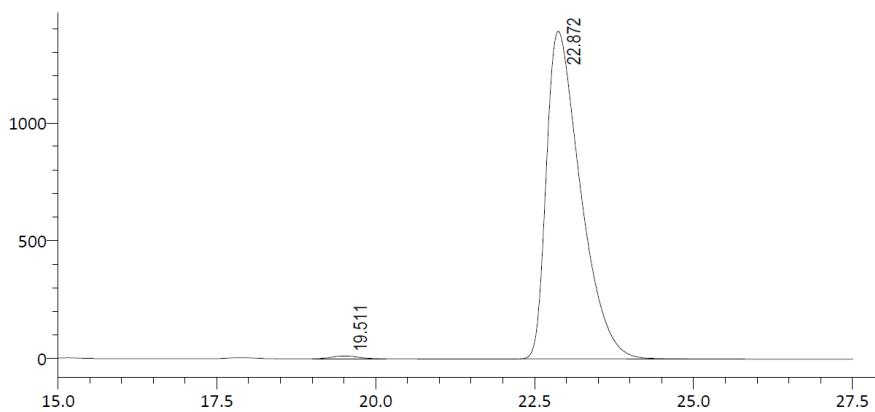

<Peak Table>  
Detector A 254nm

| Peak# | Retention Time (min) | Area (mAU*min) | Height (mAU) | Area Ratio (%) |
|-------|----------------------|----------------|--------------|----------------|
| 1     | 19.511               | 345831         | 11975        | 0.661          |
| 2     | 22.872               | 52009941       | 1391518      | 99.339         |
| Total |                      | 52355772       | 1403493      | 100.000        |

**Figure S36.** HPLC traces of racemic **3da** (reference) and chiral **3da**. Area integration = 0.7:99.3 (99% ee).

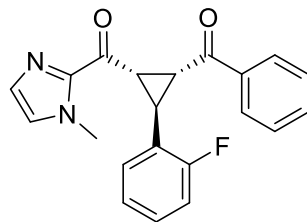

**3ea**

Chromatogram  
mV

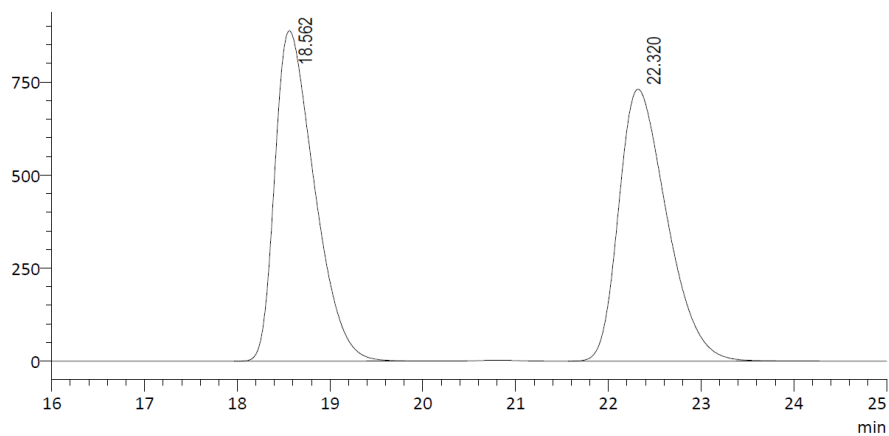

<Peak Table>

Detector A 254nm

| Peak# | Retention Time (min) | Area (mAU*min) | Height (mAU) | Area Ratio (%) |
|-------|----------------------|----------------|--------------|----------------|
| 1     | 18.562               | 26341894       | 887944       | 49.976         |
| 2     | 22.320               | 26366850       | 730871       | 50.024         |
| Total |                      | 52708745       | 1618815      | 100.000        |

Chromatogram  
mV

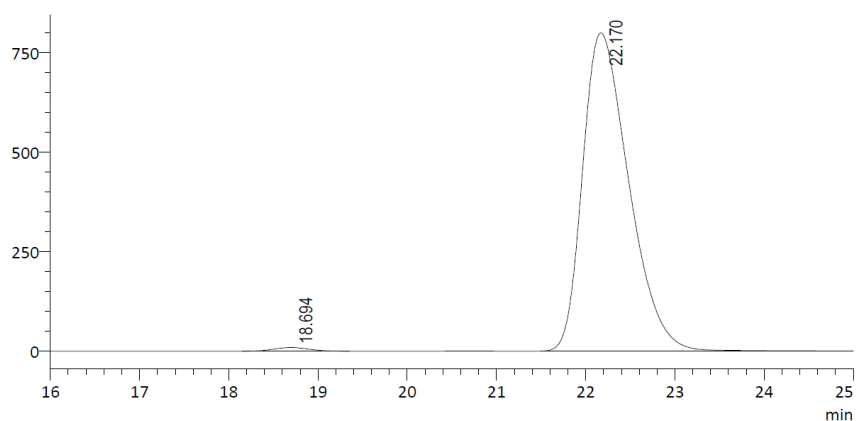

<Peak Table>

Detector A 254nm

| Peak# | Retention Time (min) | Area (mAU*min) | Height (mAU) | Area Ratio (%) |
|-------|----------------------|----------------|--------------|----------------|
| 1     | 18.694               | 265952         | 9517         | 0.914          |
| 2     | 22.170               | 28835762       | 799606       | 99.086         |
| Total |                      | 29101714       | 809123       | 100.000        |

**Figure S37.** HPLC traces of racemic **3ea** (reference) and chiral **3ea**. Area integration = 0.9:99.1 (98% ee).

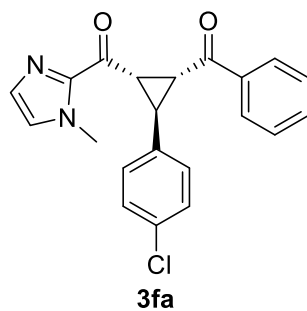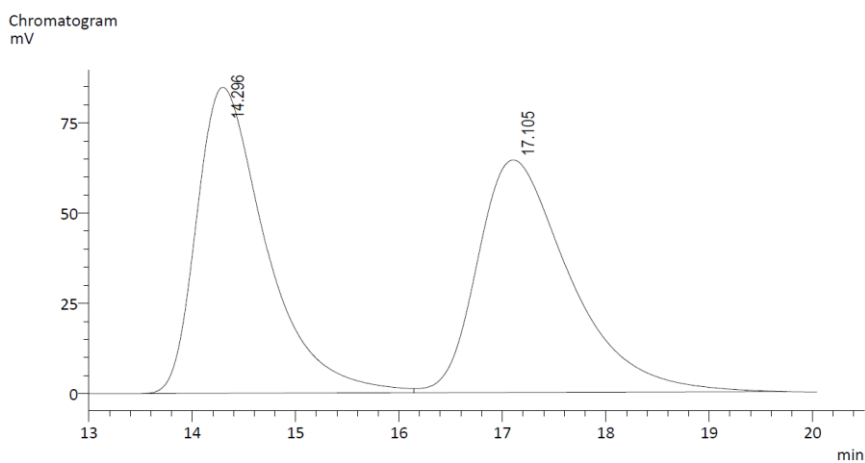

<Peak Table>  
Detector A 254nm

| Peak# | Retention Time (min) | Area (mAU*min) | Height (mAU) | Area Ratio (%) |
|-------|----------------------|----------------|--------------|----------------|
| 1     | 14.296               | 3959242        | 84726        | 49.776         |
| 2     | 17.105               | 3994878        | 64383        | 50.224         |
| Total |                      | 7954120        | 149109       | 100.000        |

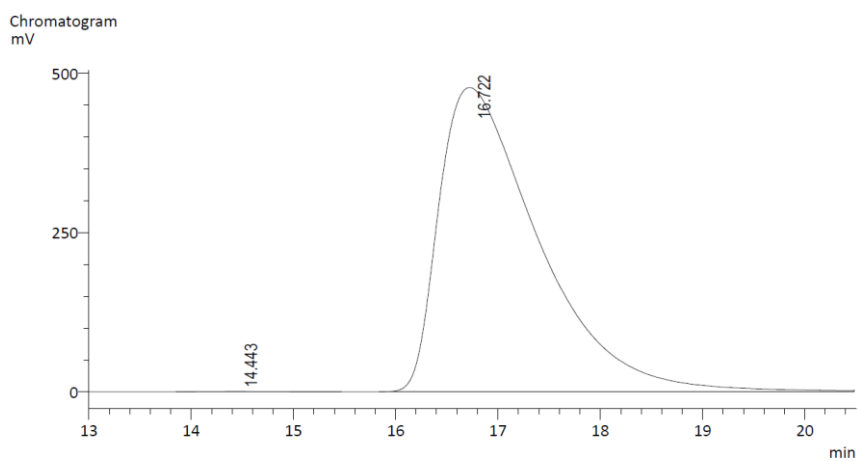

<Peak Table>  
Detector A 254nm

| Peak# | Retention Time (min) | Area (mAU*min) | Height (mAU) | Area Ratio (%) |
|-------|----------------------|----------------|--------------|----------------|
| 1     | 14.443               | 26981          | 549          | 0.083          |
| 2     | 16.722               | 32420551       | 477530       | 99.917         |
| Total |                      | 32447532       | 478079       | 100.000        |

**Figure S38.** HPLC traces of racemic **3fa** (reference) and chiral **3fa**. Area integration = 0.1:99.9 (99.8% ee).

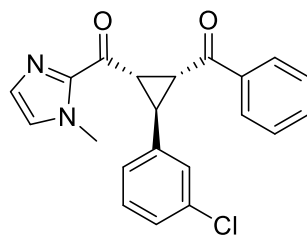

**3ga**

Chromatogram  
mV

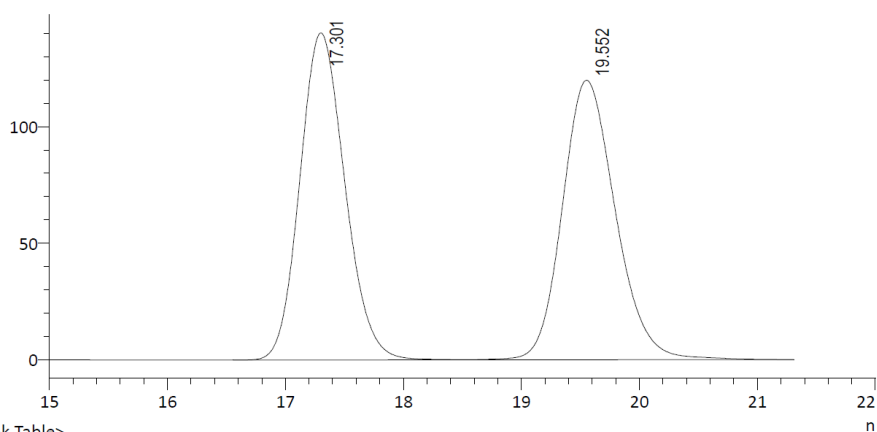

<Peak Table>

Detector A 254nm

| Peak# | Retention Time (min) | Area (mAU*min) | Height (mAU) | Area Ratio (%) |
|-------|----------------------|----------------|--------------|----------------|
| 1     | 17.301               | 3726799        | 140468       | 49.789         |
| 2     | 19.552               | 3758378        | 120019       | 50.211         |
| Total |                      | 7485177        | 260487       | 100.000        |

Chromatogram  
mV

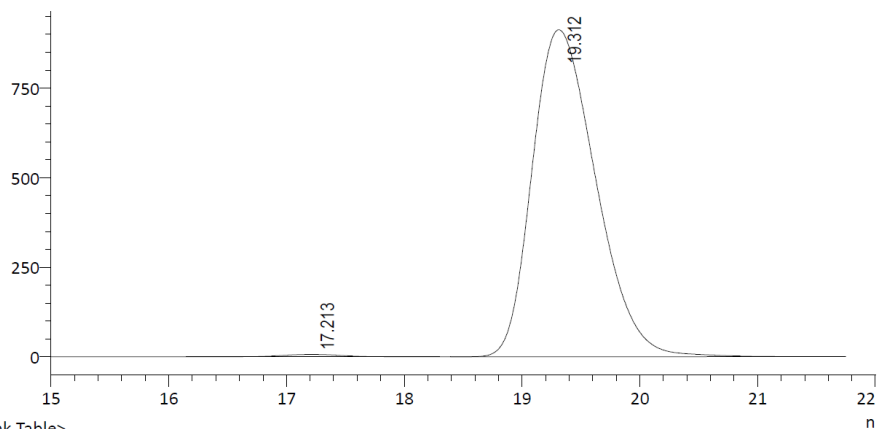

<Peak Table>

Detector A 254nm

| Peak# | Retention Time (min) | Area (mAU*min) | Height (mAU) | Area Ratio (%) |
|-------|----------------------|----------------|--------------|----------------|
| 1     | 17.213               | 246961         | 6896         | 0.715          |
| 2     | 19.312               | 34293994       | 912274       | 99.285         |
| Total |                      | 34540955       | 919169       | 100.000        |

**Figure S39.** HPLC traces of racemic **3ga** (reference) and chiral **3ga**. Area integration = 0.7:99.3 (99% ee).



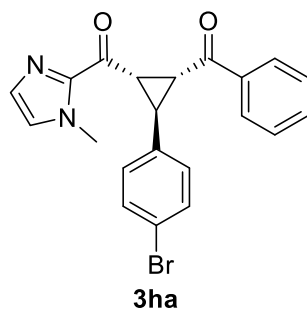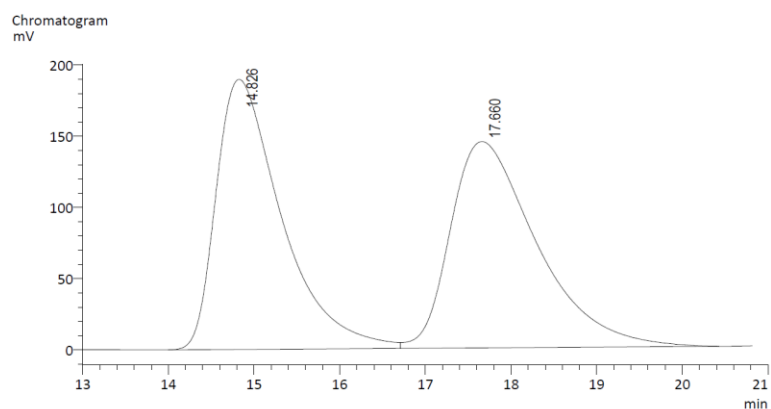

<Peak Table>  
Detector A 254nm

| Peak# | Retention Time (min) | Area (mAU*min) | Height (mAU) | Area Ratio (%) |
|-------|----------------------|----------------|--------------|----------------|
| 1     | 14.826               | 10062855       | 189595       | 49.790         |
| 2     | 17.660               | 10147925       | 144835       | 50.210         |
| Total |                      | 20210780       | 334430       | 100.000        |

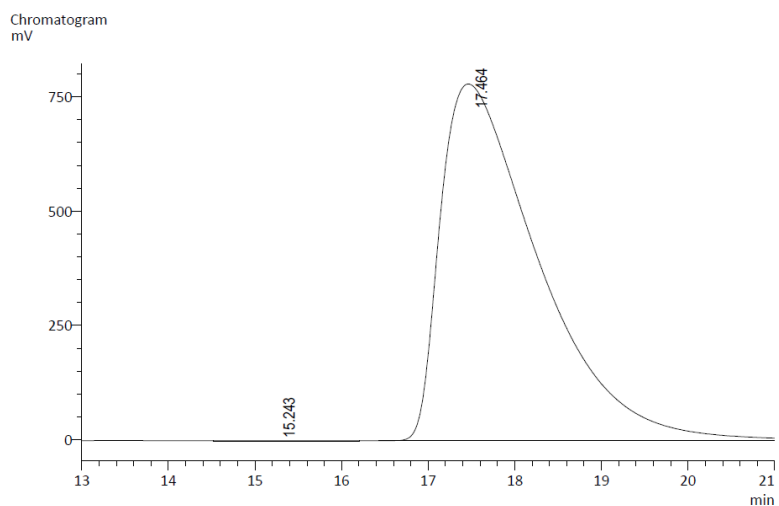

<Peak Table>  
Detector A 254nm

| Peak# | Retention Time (min) | Area (mAU*min) | Height (mAU) | Area Ratio (%) |
|-------|----------------------|----------------|--------------|----------------|
| 1     | 15.243               | 25594          | 464          | 0.041          |
| 2     | 17.464               | 62341981       | 781181       | 99.959         |
| Total |                      | 62367575       | 781645       | 100.000        |

**Figure S40.** HPLC traces of racemic **3ha** (reference) and chiral **3ha**. Area integration = 0.1:99.9 (99.8% ee).

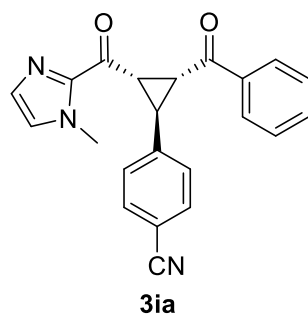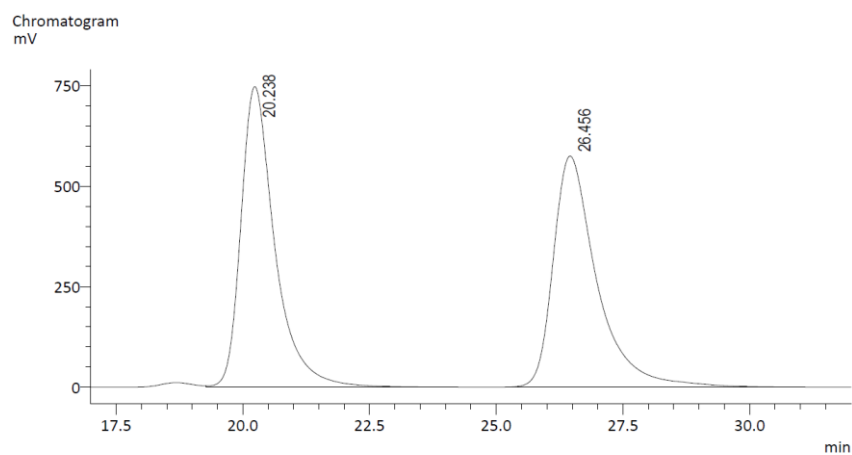

<Peak Table>  
Detector A 254nm

| Peak# | Retention Time (min) | Area (mAU*min) | Height (mAU) | Area Ratio (%) |
|-------|----------------------|----------------|--------------|----------------|
| 1     | 20.238               | 34768446       | 747729       | 50.260         |
| 2     | 26.456               | 34408552       | 574783       | 49.740         |
| Total |                      | 69176997       | 1322512      | 100.000        |

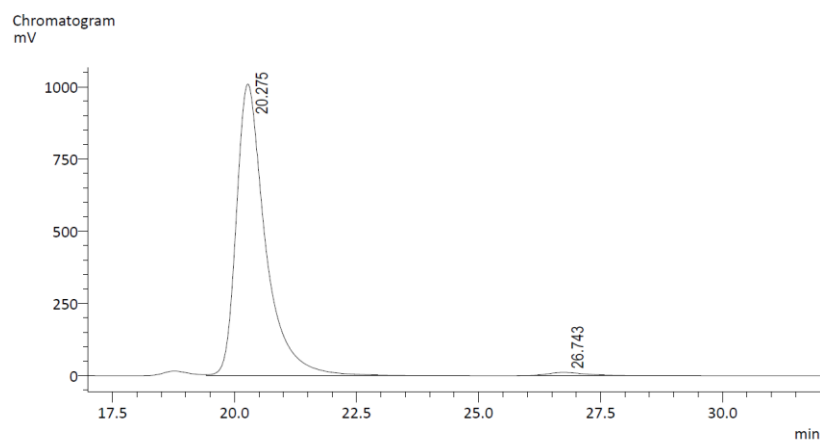

<Peak Table>  
Detector A 254nm

| Peak# | Retention Time (min) | Area (mAU*min) | Height (mAU) | Area Ratio (%) |
|-------|----------------------|----------------|--------------|----------------|
| 1     | 20.275               | 41788223       | 1009835      | 98.558         |
| 2     | 26.743               | 611440         | 10959        | 1.442          |
| Total |                      | 42399662       | 1020794      | 100.000        |

**Figure S41.** HPLC traces of racemic **3ia** (reference) and chiral **3ia**. Area integration = 98.6:1.4 (97% ee).

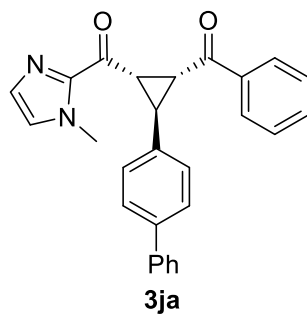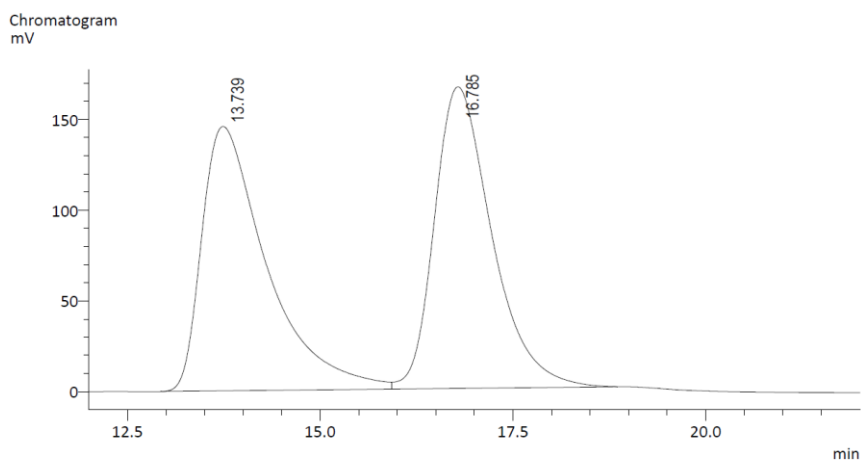

<Peak Table>  
Detector A 254nm

| Peak# | Retention Time (min) | Area (mAU*min) | Height (mAU) | Area Ratio (%) |
|-------|----------------------|----------------|--------------|----------------|
| 1     | 13.739               | 8544925        | 145738       | 49.787         |
| 2     | 16.785               | 8618167        | 166188       | 50.213         |
| Total |                      | 17163092       | 311927       | 100.000        |

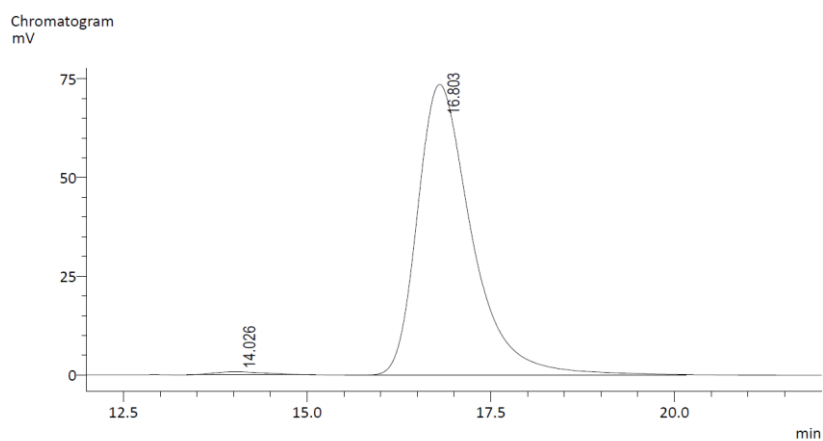

<Peak Table>  
Detector A 254nm

| Peak# | Retention Time (min) | Area (mAU*min) | Height (mAU) | Area Ratio (%) |
|-------|----------------------|----------------|--------------|----------------|
| 1     | 14.026               | 35402          | 724          | 0.924          |
| 2     | 16.803               | 3794017        | 73619        | 99.076         |
| Total |                      | 3829419        | 74343        | 100.000        |

**Figure S42.** HPLC traces of racemic **3ja** (reference) and chiral **3ja**. Area integration = 0.9:99.1 (98% ee).

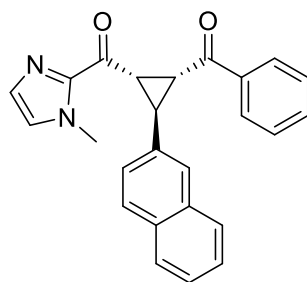

**3ka**

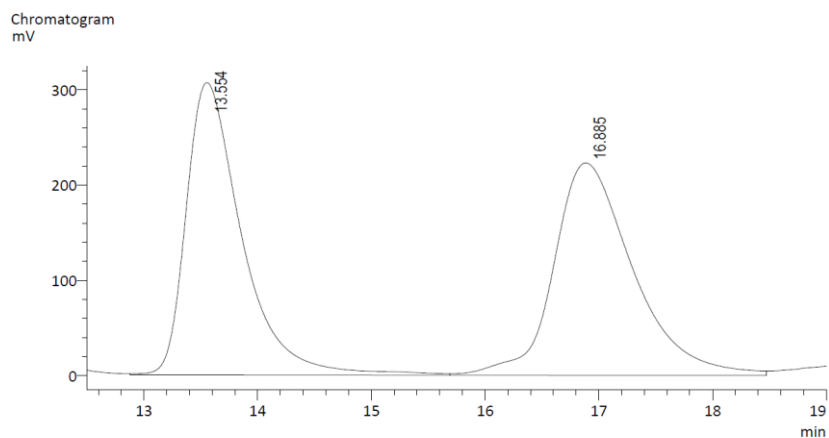

<Peak Table>

Detector A 254nm

| Peak# | Retention Time (min) | Area (mAU*min) | Height (mAU) | Area Ratio (%) |
|-------|----------------------|----------------|--------------|----------------|
| 1     | 13.554               | 10424418       | 306489       | 49.155         |
| 2     | 16.885               | 10782735       | 222532       | 50.845         |
| Total |                      | 21207153       | 529020       | 100.000        |

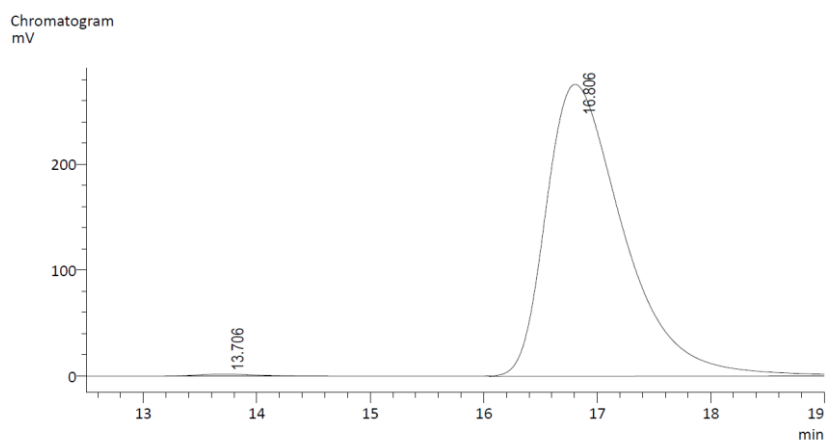

<Peak Table>

Detector A 254nm

| Peak# | Retention Time (min) | Area (mAU*min) | Height (mAU) | Area Ratio (%) |
|-------|----------------------|----------------|--------------|----------------|
| 1     | 13.706               | 60246          | 1799         | 0.457          |
| 2     | 16.806               | 13117360       | 275804       | 99.543         |
| Total |                      | 13177606       | 277603       | 100.000        |

**Figure S43.** HPLC traces of racemic **3ka** (reference) and chiral **3ka**. Area integration = 0.5:99.5 (99% ee).

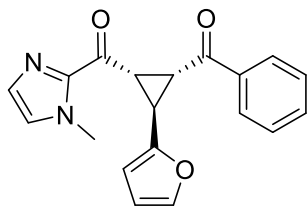

**3la**

Chromatogram  
mV

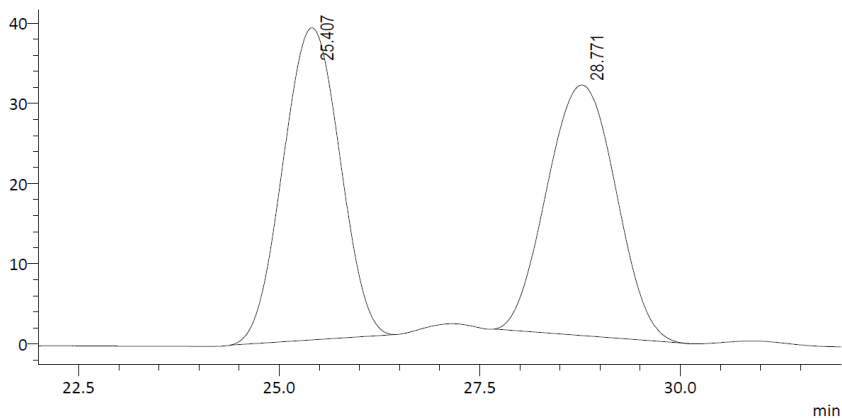

<Peak Table>

Detector A 254nm

| Peak# | Retention Time (min) | Area (mAU*min) | Height (mAU) | Area Ratio (%) |
|-------|----------------------|----------------|--------------|----------------|
| 1     | 25.407               | 1923401        | 38922        | 50.659         |
| 2     | 28.771               | 1873345        | 31264        | 49.341         |
| Total |                      | 3796747        | 70186        | 100.000        |

Chromatogram  
mV

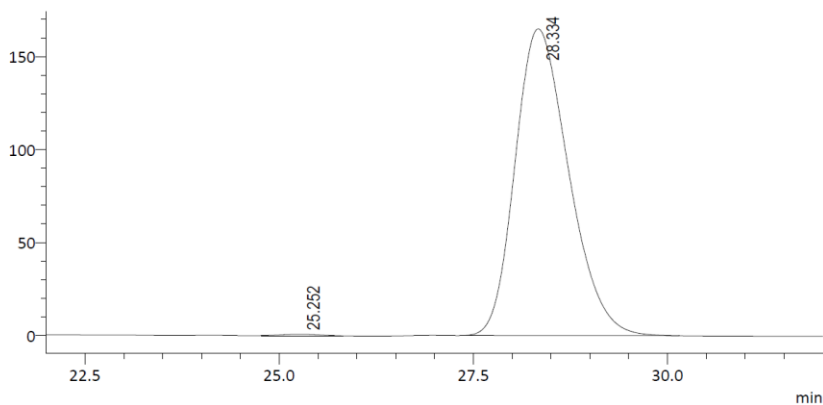

<Peak Table>

Detector A 254nm

| Peak# | Retention Time (min) | Area (mAU*min) | Height (mAU) | Area Ratio (%) |
|-------|----------------------|----------------|--------------|----------------|
| 1     | 25.252               | 33530          | 870          | 0.422          |
| 2     | 28.334               | 7913863        | 164969       | 99.578         |
| Total |                      | 7947394        | 165839       | 100.000        |

**Figure S44.** HPLC traces of racemic **3la** (reference) and chiral **3la**. Area integration = 0.4:99.6 (99% ee).

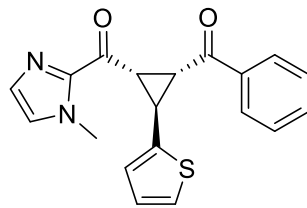

**3ma**

Chromatogram  
mV

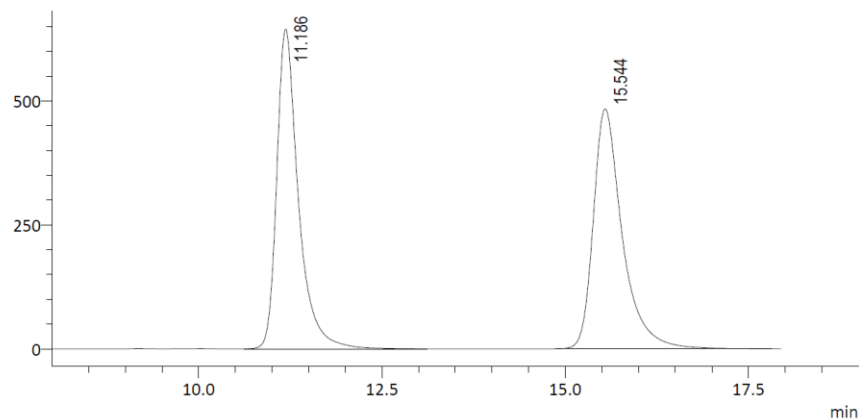

<Peak Table>

Detector A 254nm

| Peak# | Retention Time (min) | Area (mAU*min) | Height (mAU) | Area Ratio (%) |
|-------|----------------------|----------------|--------------|----------------|
| 1     | 11.186               | 13276812       | 645231       | 49.943         |
| 2     | 15.544               | 13307201       | 484274       | 50.057         |
| Total |                      | 26584012       | 1129505      | 100.000        |

Chromatogram  
mV

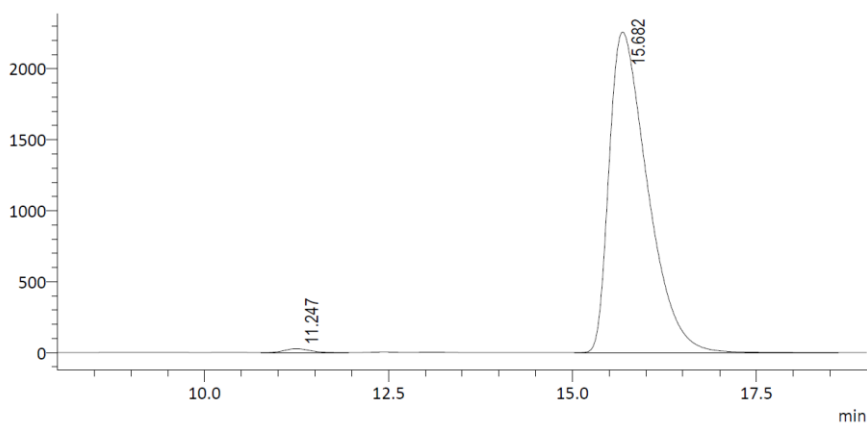

<Peak Table>

Detector A 254nm

| Peak# | Retention Time (min) | Area (mAU*min) | Height (mAU) | Area Ratio (%) |
|-------|----------------------|----------------|--------------|----------------|
| 1     | 11.247               | 645100         | 27359        | 0.780          |
| 2     | 15.682               | 82108410       | 2259987      | 99.220         |
| Total |                      | 82753510       | 2287346      | 100.000        |

**Figure S45.** HPLC traces of racemic **3ma** (reference) and chiral **3ma**. Area integration = 0.8:99.2 (98% ee).

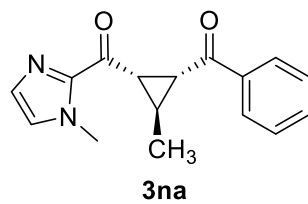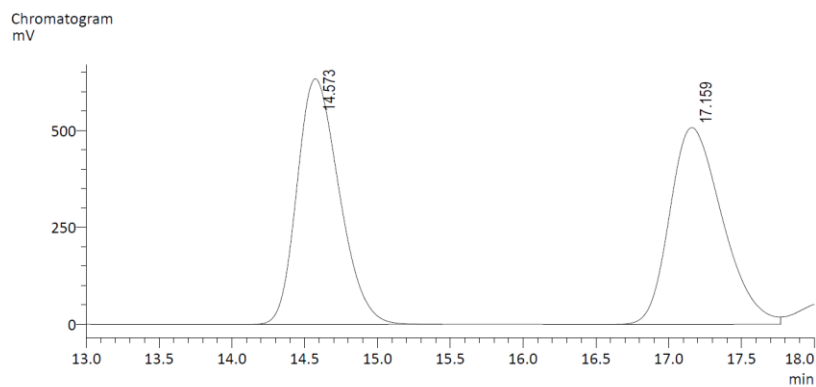

<Peak Table>

Detector A 254nm

| Peak# | Retention Time (min) | Area (mAU*min) | Height (mAU) | Area Ratio (%) |
|-------|----------------------|----------------|--------------|----------------|
| 1     | 14.573               | 12747782       | 633383       | 49.977         |
| 2     | 17.159               | 12759561       | 507479       | 50.023         |
| Total |                      | 25507343       | 1140862      | 100.000        |

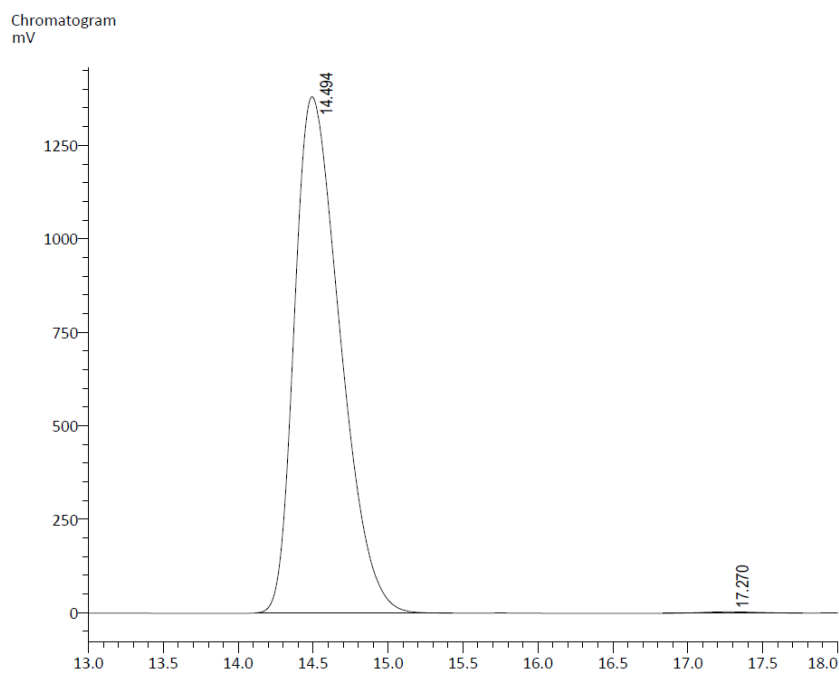

<Peak Table>

Detector A 254nm

| Peak# | Retention Time (min) | Area (mAU*min) | Height (mAU) | Area Ratio (%) |
|-------|----------------------|----------------|--------------|----------------|
| 1     | 14.494               | 29272687       | 1381531      | 99.646         |
| 2     | 17.270               | 103999         | 3659         | 0.354          |
| Total |                      | 29376685       | 1385191      | 100.000        |

**Figure S46.** HPLC traces of racemic **3na** (reference) and chiral **3na**. Area integration = 99.6:0.4 (99% ee).

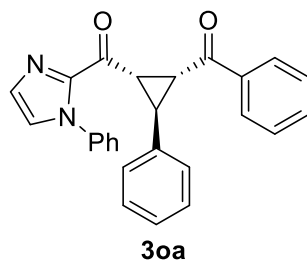

Chromatogram  
mV

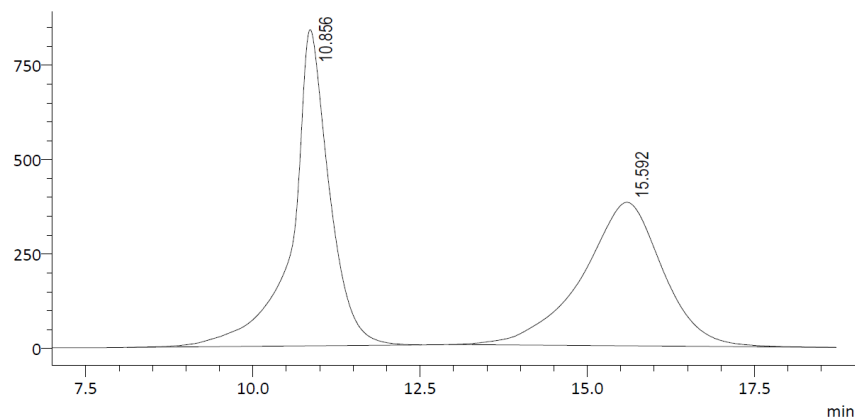

<Peak Table>

Detector A 254nm

| Peak# | Retention Time (min) | Area (mAU*min) | Height (mAU) | Area Ratio (%) |
|-------|----------------------|----------------|--------------|----------------|
| 1     | 10.856               | 32605399       | 836893       | 50.495         |
| 2     | 15.592               | 31965899       | 379886       | 49.505         |
| Total |                      | 64571297       | 1216780      | 100.000        |

Chromatogram  
mV

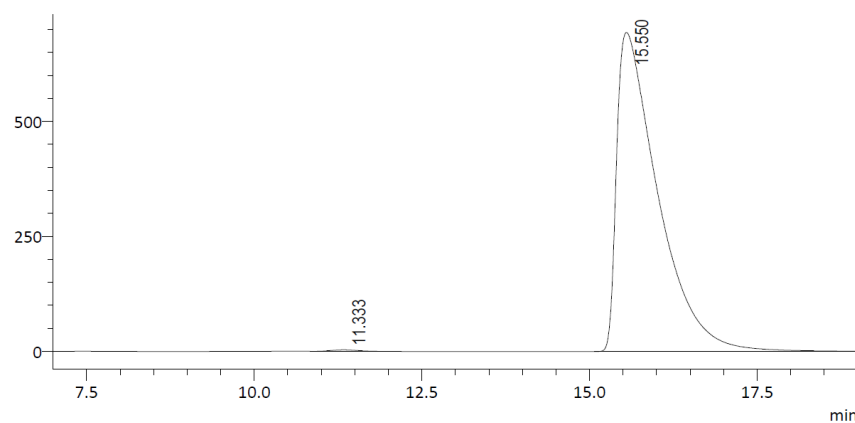

<Peak Table>

Detector A 254nm

| Peak# | Retention Time (min) | Area (mAU*min) | Height (mAU) | Area Ratio (%) |
|-------|----------------------|----------------|--------------|----------------|
| 1     | 11.333               | 116990         | 3577         | 0.391          |
| 2     | 15.550               | 29809084       | 694089       | 99.609         |
| Total |                      | 29926073       | 697666       | 100.000        |

**Figure S47.** HPLC traces of racemic **3oa** (reference) and chiral **3oa**. Area integration =0.4: 99.6 (99% ee).



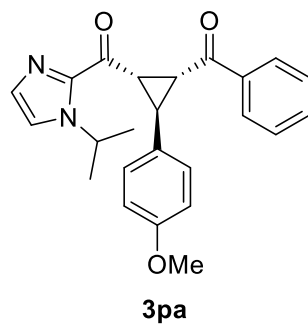

Chromatogram  
mV

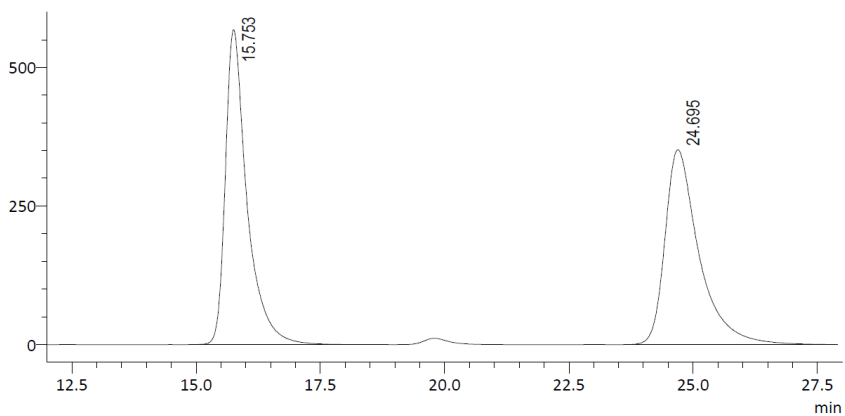

<Peak Table>

Detector A 254nm

| Peak# | Retention Time (min) | Area (mAU*min) | Height (mAU) | Area Ratio (%) |
|-------|----------------------|----------------|--------------|----------------|
| 1     | 15.753               | 17181530       | 568130       | 50.598         |
| 2     | 24.695               | 16775653       | 351570       | 49.402         |
| Total |                      | 33957183       | 919700       | 100.000        |

Chromatogram  
mV

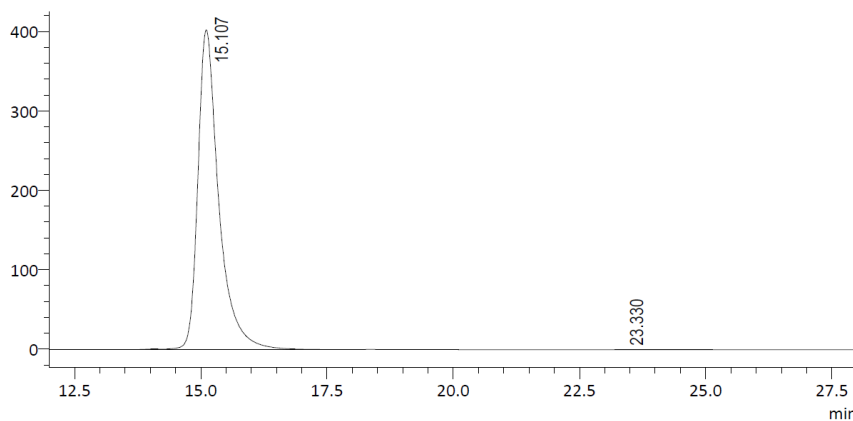

<Peak Table>

Detector A 254nm

| Peak# | Retention Time (min) | Area (mAU*min) | Height (mAU) | Area Ratio (%) |
|-------|----------------------|----------------|--------------|----------------|
| 1     | 15.107               | 11662887       | 403049       | 99.870         |
| 2     | 23.330               | 15240          | 145          | 0.130          |
| Total |                      | 11678127       | 403194       | 100.000        |

**Figure S48.** HPLC traces of racemic **3pa** (reference) and chiral **3pa**. Area integration = 99.9:0.1 (99.8% ee).

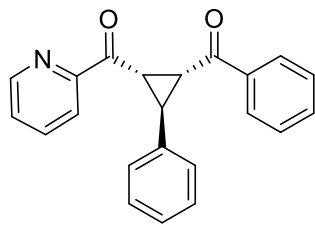

**3qa**

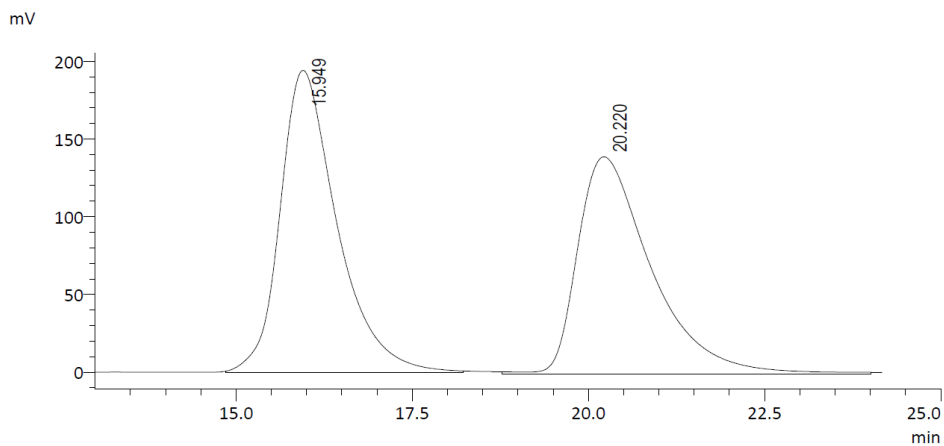

Integration Table

Detector A 254nm

| Peak No. | Retention Time (min) | Area (mAU*s) | Height (mAU) | Area Ratio (%) |
|----------|----------------------|--------------|--------------|----------------|
| 1        | 15.949               | 10896402     | 194258       | 51.743         |
| 2        | 20.220               | 10162401     | 139665       | 48.257         |
| 总计       |                      | 21058804     | 333923       | 100.000        |

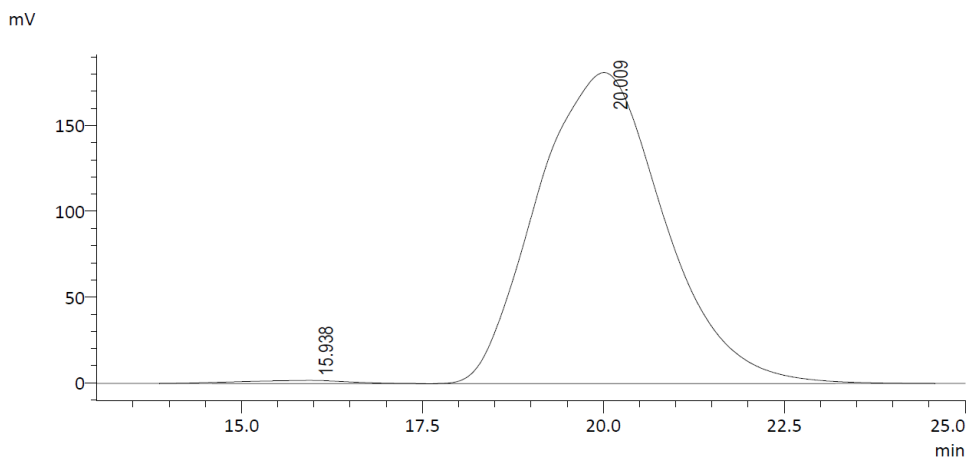

Integration Table

Detector A 254nm

| Peak No. | Retention Time (min) | Area (mAU*s) | Height (mAU) | Area Ratio (%) |
|----------|----------------------|--------------|--------------|----------------|
| 1        | 15.938               | 185047       | 1827         | 0.829          |
| 2        | 20.009               | 22127687     | 181308       | 99.171         |
| 总计       |                      | 22312735     | 183134       | 100.000        |

**Figure S49.** HPLC traces of racemic **3qa** (reference) and chiral **3qa**. Area integration = 0.8:99.2 (98% ee).

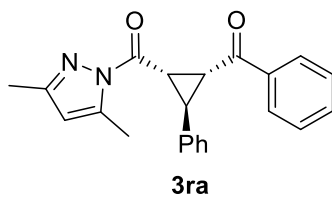

Chromatogram  
mV

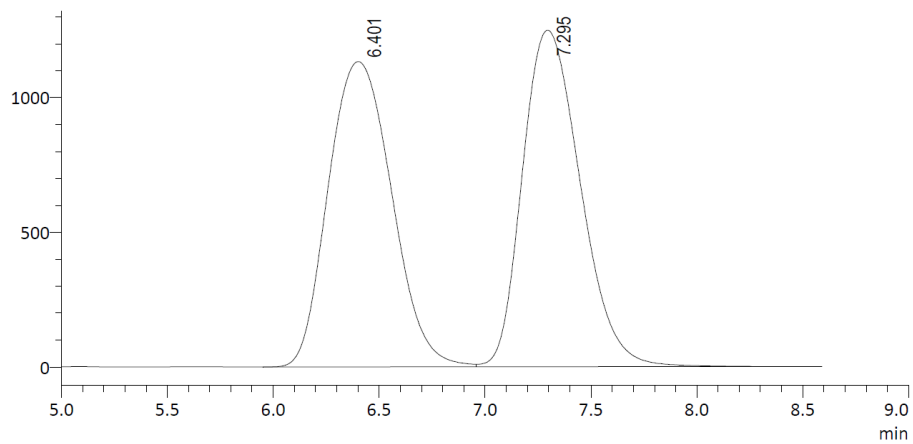

<Peak Table>

Detector A 254nm

| Peak# | Retention Time (min) | Area (mAU*min) | Height (mAU) | Area Ratio (%) |
|-------|----------------------|----------------|--------------|----------------|
| 1     | 6.401                | 23675969       | 1134136      | 49.869         |
| 2     | 7.295                | 23800576       | 1249766      | 50.131         |
| Total |                      | 47476545       | 2383902      | 100.000        |

Chromatogram  
mV

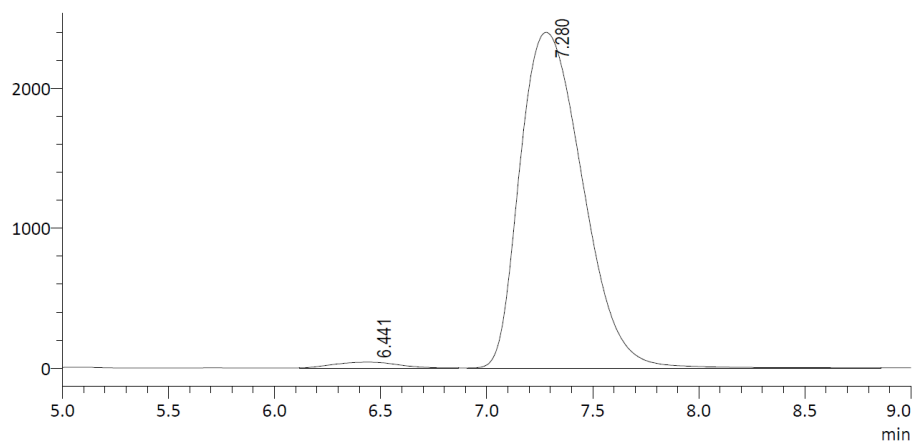

<Peak Table>

Detector A 254nm

| Peak# | Retention Time (min) | Area (mAU*min) | Height (mAU) | Area Ratio (%) |
|-------|----------------------|----------------|--------------|----------------|
| 1     | 6.441                | 850223         | 41097        | 1.690          |
| 2     | 7.280                | 49448663       | 2401539      | 98.310         |
| Total |                      | 50298886       | 2442636      | 100.000        |

**Figure S50.** HPLC traces of racemic **3ra** (reference) and chiral **3ra**. Area integration = 1.7:98.3 (97% ee).

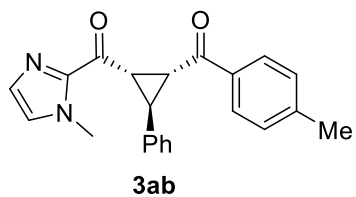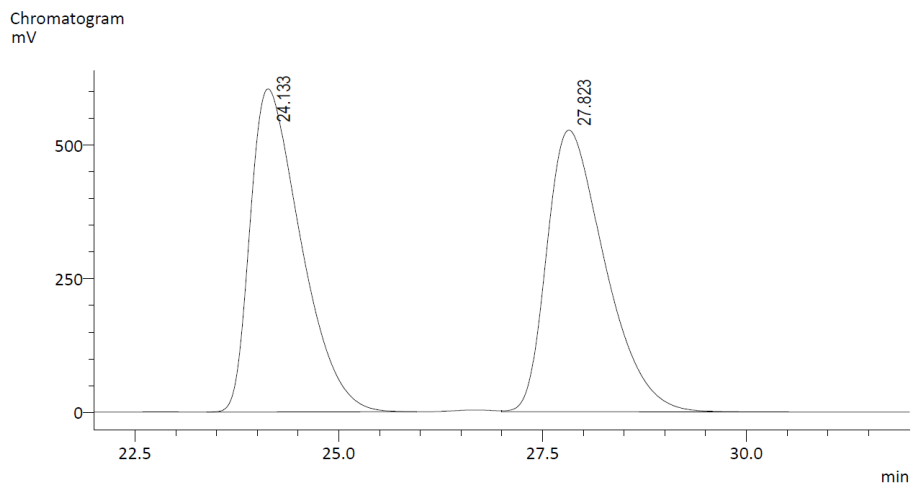

<Peak Table>  
Detector A 254nm

| Peak# | Retention Time (min) | Area (mAU*min) | Height (mAU) | Area Ratio (%) |
|-------|----------------------|----------------|--------------|----------------|
| 1     | 24.133               | 26150534       | 604431       | 49.990         |
| 2     | 27.823               | 26160727       | 526800       | 50.010         |
| Total |                      | 52311261       | 1131231      | 100.000        |

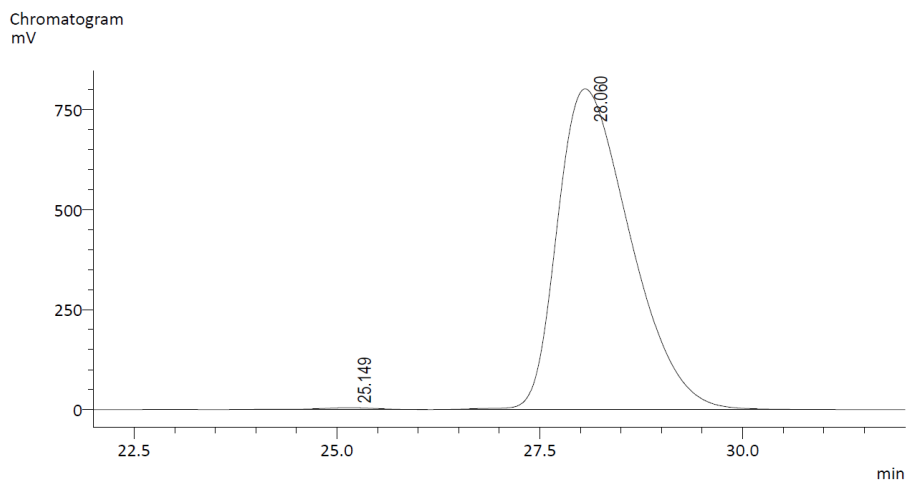

<Peak Table>  
Detector A 254nm

| Peak# | Retention Time (min) | Area (mAU*min) | Height (mAU) | Area Ratio (%) |
|-------|----------------------|----------------|--------------|----------------|
| 1     | 25.149               | 251910         | 4423         | 0.501          |
| 2     | 28.060               | 50005369       | 801921       | 99.499         |
| Total |                      | 50257279       | 806345       | 100.000        |

**Figure S51.** HPLC traces of racemic **3ab** (reference) and chiral **3ab**. Area integration = 0.5: 99.5 (99% ee).

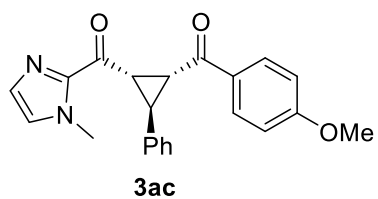

Chromatogram  
mV

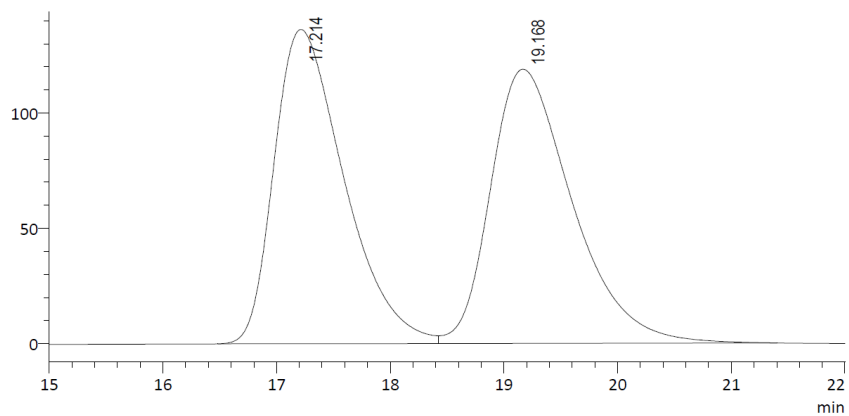

<Peak Table>

Detector A 254nm

| Peak# | Retention Time (min) | Area (mAU*min) | Height (mAU) | Area Ratio (%) |
|-------|----------------------|----------------|--------------|----------------|
| 1     | 17.214               | 5828263        | 136230       | 49.521         |
| 2     | 19.168               | 5940984        | 118844       | 50.479         |
| Total |                      | 11769247       | 255073       | 100.000        |

Chromatogram  
mV

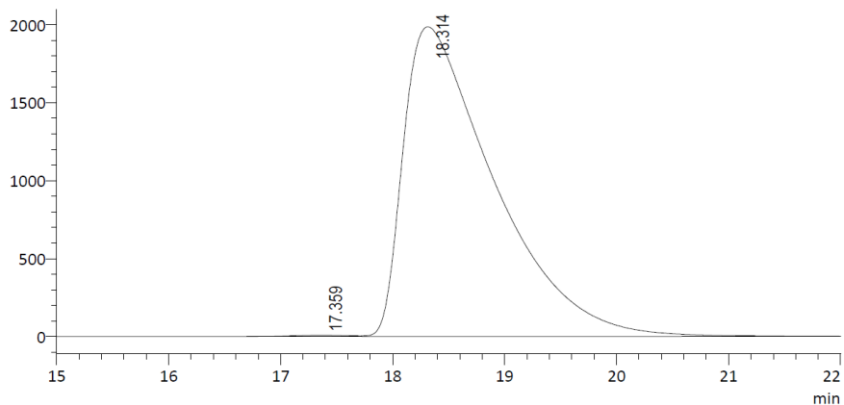

<Peak Table>

Detector A 254nm

| Peak# | Retention Time (min) | Area (mAU*min) | Height (mAU) | Area Ratio (%) |
|-------|----------------------|----------------|--------------|----------------|
| 1     | 17.359               | 313137         | 9213         | 0.279          |
| 2     | 18.314               | 112084595      | 1986446      | 99.721         |
| Total |                      | 112397732      | 1995658      | 100.000        |

**Figure S52.** HPLC traces of racemic **3ac** (reference) and chiral **3ac**. Area integration = 0.3:99.7 (99.4% ee).

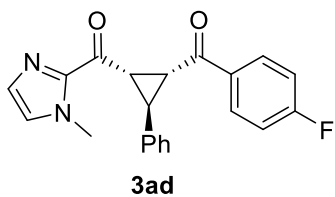

Chromatogram  
mV

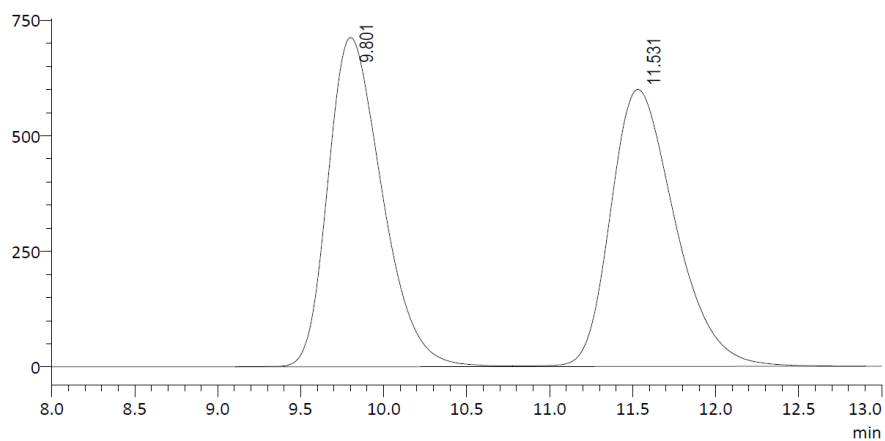

<Peak Table>

Detector A 254nm

| Peak# | Retention Time (min) | Area (mAU*min) | Height (mAU) | Area Ratio (%) |
|-------|----------------------|----------------|--------------|----------------|
| 1     | 9.801                | 16171629       | 712174       | 49.998         |
| 2     | 11.531               | 16172640       | 599272       | 50.002         |
| Total |                      | 32344269       | 1311446      | 100.000        |

Chromatogram  
mV

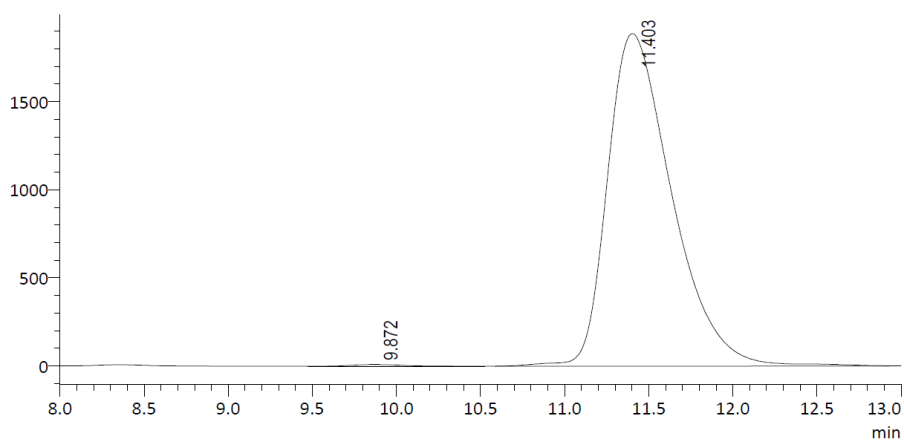

<Peak Table>

Detector A 254nm

| Peak# | Retention Time (min) | Area (mAU*min) | Height (mAU) | Area Ratio (%) |
|-------|----------------------|----------------|--------------|----------------|
| 1     | 9.872                | 209086         | 10093        | 0.414          |
| 2     | 11.403               | 50326252       | 1887432      | 99.586         |
| Total |                      | 50535338       | 1897525      | 100.000        |

**Figure S53.** HPLC traces of racemic **3ad** (reference) and chiral **3ad**. Area integration = 0.4:99.6 (99% ee).

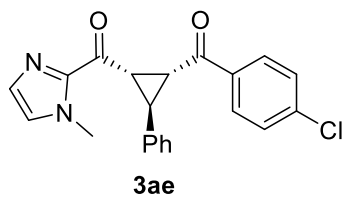

Chromatogram  
mV

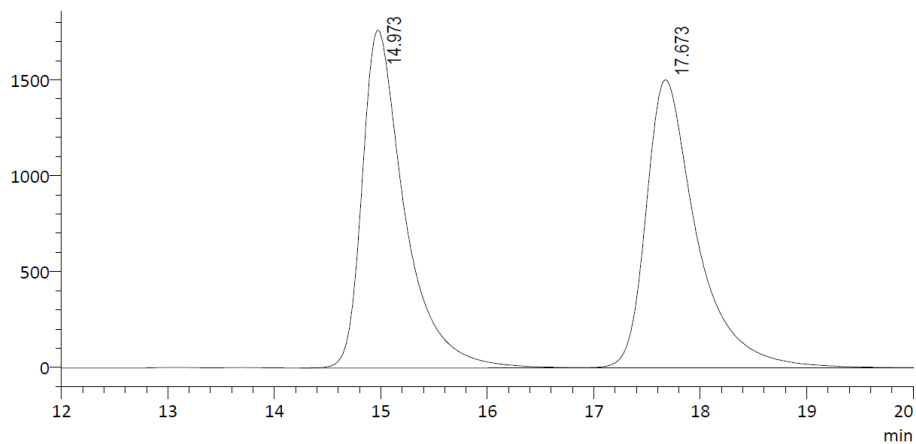

<Peak Table>

Detector A 254nm

| Peak# | Retention Time (min) | Area (mAU*min) | Height (mAU) | Area Ratio (%) |
|-------|----------------------|----------------|--------------|----------------|
| 1     | 14.973               | 49079628       | 1762206      | 49.638         |
| 2     | 17.673               | 49795111       | 1502281      | 50.362         |
| Total |                      | 98874738       | 3264488      | 100.000        |

Chromatogram  
mV

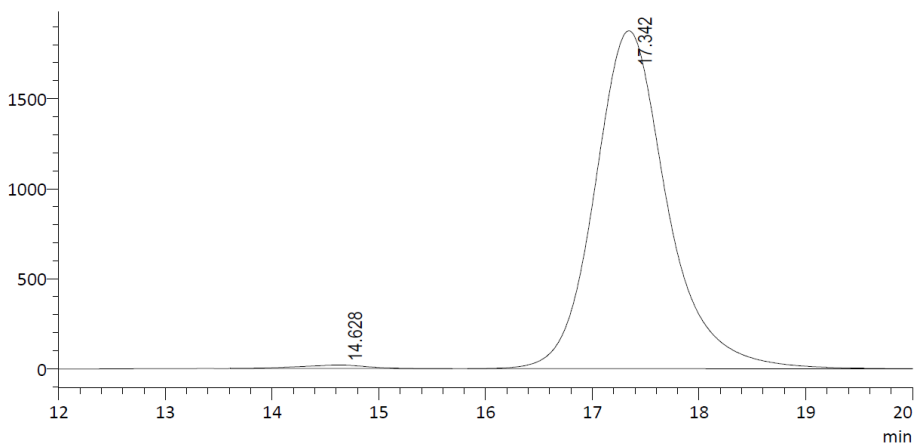

<Peak Table>

Detector A 254nm

| Peak# | Retention Time (min) | Area (mAU*min) | Height (mAU) | Area Ratio (%) |
|-------|----------------------|----------------|--------------|----------------|
| 1     | 14.628               | 870879         | 19675        | 0.973          |
| 2     | 17.342               | 88592698       | 1877694      | 99.027         |
| Total |                      | 89463577       | 1897369      | 100.000        |

**Figure S54.** HPLC traces of racemic **3ae** (reference) and chiral **3ae**. Area integration = 1.0:99.0 (98% ee).

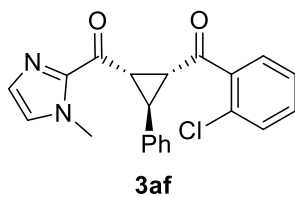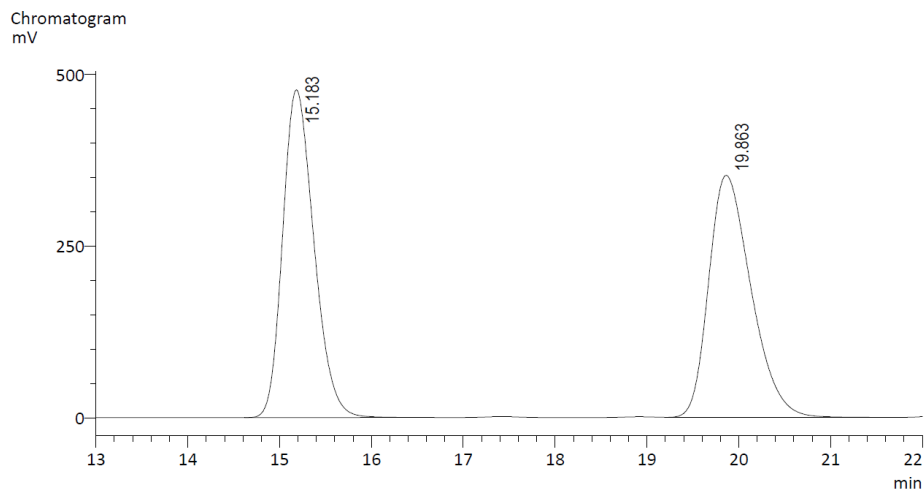

<Peak Table>

Detector A 254nm

| Peak# | Retention Time (min) | Area (mAU*min) | Height (mAU) | Area Ratio (%) |
|-------|----------------------|----------------|--------------|----------------|
| 1     | 15.183               | 11294842       | 477507       | 50.002         |
| 2     | 19.863               | 11293967       | 352552       | 49.998         |
| Total |                      | 22588809       | 830059       | 100.000        |

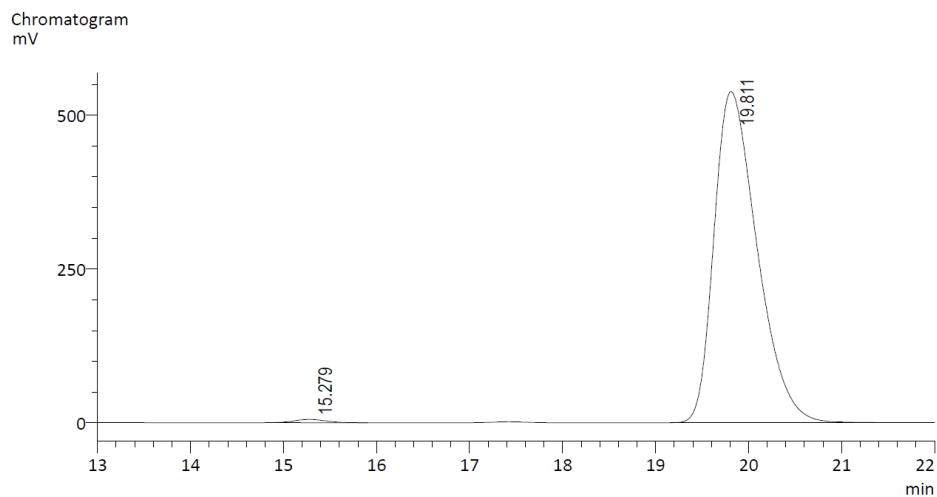

<Peak Table>

Detector A 254nm

| Peak# | Retention Time (min) | Area (mAU*min) | Height (mAU) | Area Ratio (%) |
|-------|----------------------|----------------|--------------|----------------|
| 1     | 15.279               | 129556         | 5414         | 0.740          |
| 2     | 19.811               | 17381872       | 538833       | 99.260         |
| Total |                      | 17511428       | 544247       | 100.000        |

**Figure S55.** HPLC traces of racemic **3af** (reference) and chiral **3af**. Area integration = 0.7:99.3 (99% ee).



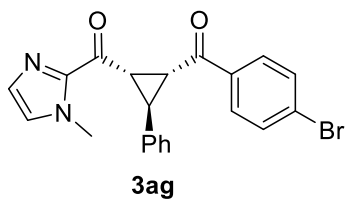

Chromatogram  
mV

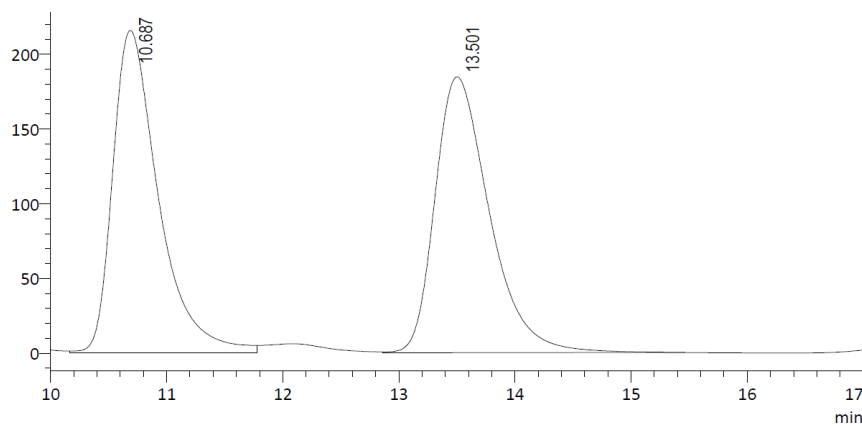

<Peak Table>

Detector A 254nm

| Peak# | Retention Time (min) | Area (mAU*min) | Height (mAU) | Area Ratio (%) |
|-------|----------------------|----------------|--------------|----------------|
| 1     | 10.687               | 5929295        | 215889       | 49.647         |
| 2     | 13.501               | 6013570        | 184538       | 50.353         |
| Total |                      | 11942865       | 400427       | 100.000        |

Chromatogram  
mV

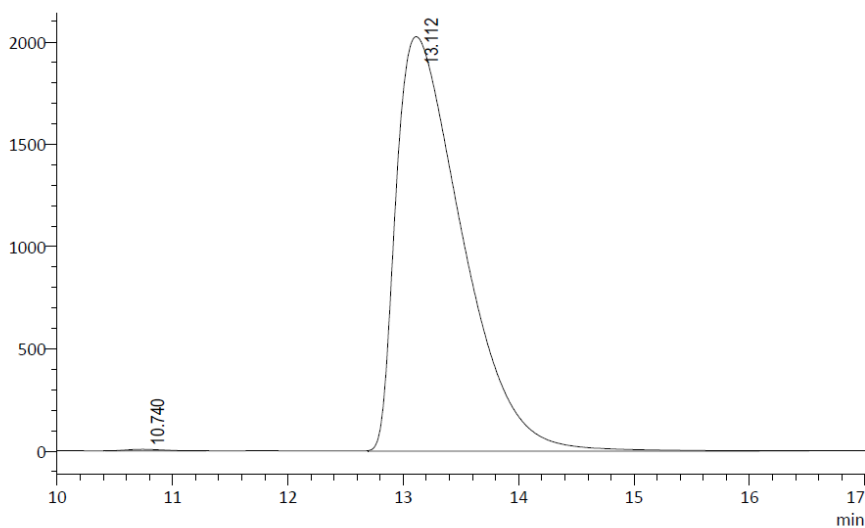

<Peak Table>

Detector A 254nm

| Peak# | Retention Time (min) | Area (mAU*min) | Height (mAU) | Area Ratio (%) |
|-------|----------------------|----------------|--------------|----------------|
| 1     | 10.740               | 193559         | 7782         | 0.239          |
| 2     | 13.112               | 80787518       | 2026003      | 99.761         |
| Total |                      | 80981077       | 2033785      | 100.000        |

**Figure S56.** HPLC traces of racemic **3ag** (reference) and chiral **3ag**. Area integration = 0.2:99.8 (99.6% ee).

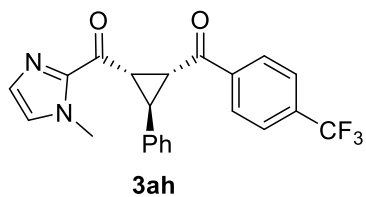

Chromatogram  
mV

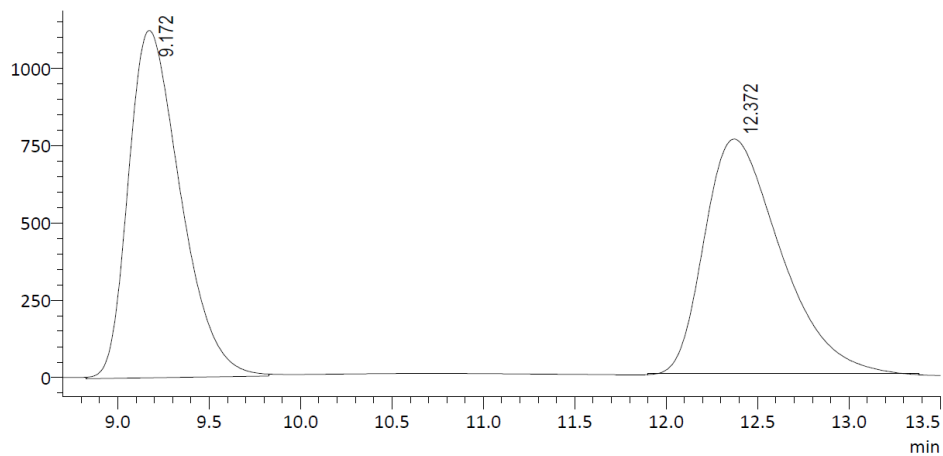

<Peak Table>  
Detector A 254nm

| Peak# | Retention Time (min) | Area (mAU*min) | Height (mAU) | Area Ratio (%) |
|-------|----------------------|----------------|--------------|----------------|
| 1     | 9.172                | 22316921       | 1122577      | 50.440         |
| 2     | 12.372               | 21927784       | 758169       | 49.560         |
| Total |                      | 44244705       | 1880746      | 100.000        |

Chromatogram  
mV

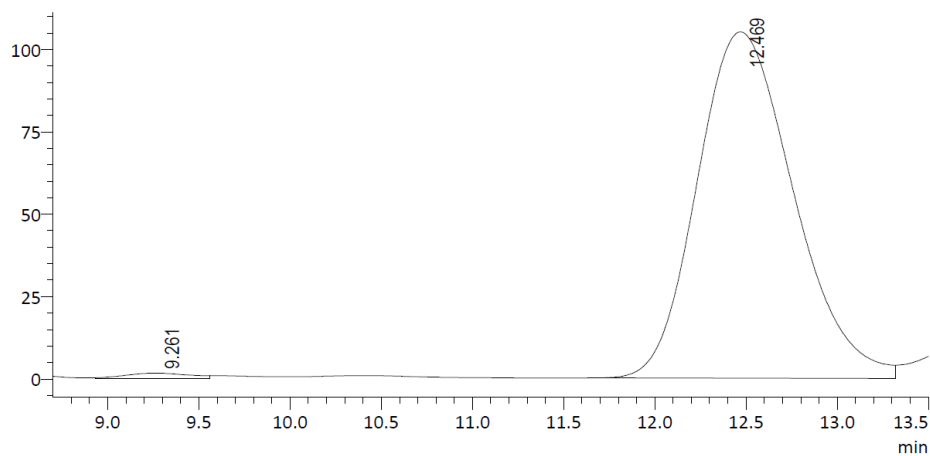

<Peak Table>  
Detector A 254nm

| Peak# | Retention Time (min) | Area (mAU*min) | Height (mAU) | Area Ratio (%) |
|-------|----------------------|----------------|--------------|----------------|
| 1     | 9.261                | 40860          | 1638         | 1.049          |
| 2     | 12.469               | 3853603        | 105113       | 98.951         |
| Total |                      | 3894463        | 106752       | 100.000        |

**Figure S57.** HPLC traces of racemic **3ah** (reference) and chiral **3ah**. Area integration = 1.0:99.0 (98% ee).

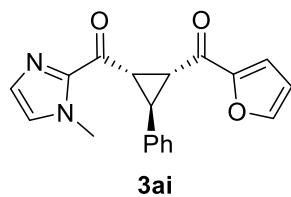

Chromatogram  
mV

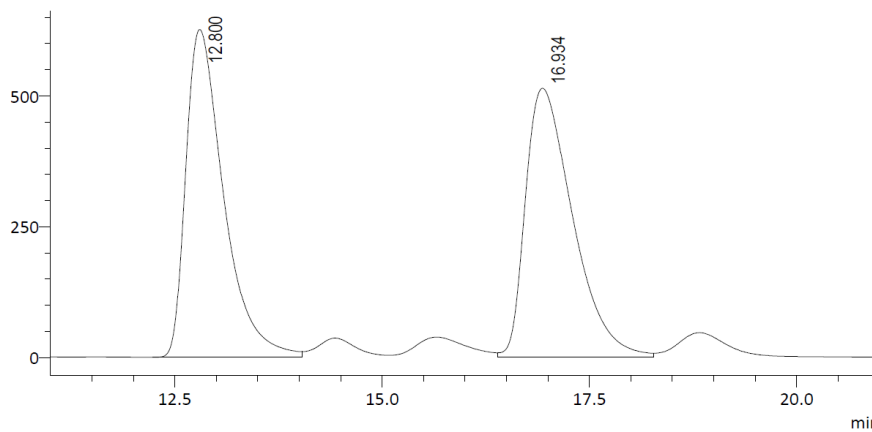

<Peak Table>

Detector A 254nm

| Peak# | Retention Time (min) | Area (mAU*min) | Height (mAU) | Area Ratio (%) |
|-------|----------------------|----------------|--------------|----------------|
| 1     | 12.800               | 19902695       | 626269       | 49.359         |
| 2     | 16.934               | 20419976       | 513884       | 50.641         |
| Total |                      | 40322671       | 1140153      | 100.000        |

Chromatogram  
mV

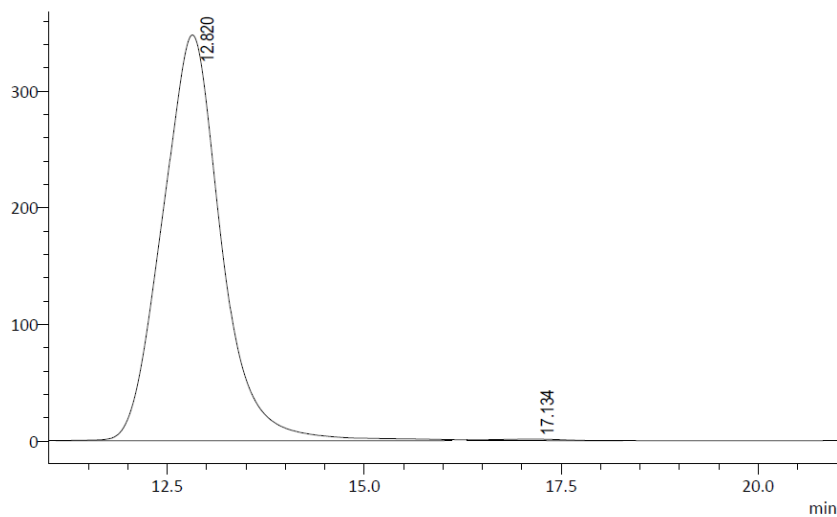

<Peak Table>

Detector A 254nm

| Peak# | Retention Time (min) | Area (mAU*min) | Height (mAU) | Area Ratio (%) |
|-------|----------------------|----------------|--------------|----------------|
| 1     | 12.820               | 18192948       | 348149       | 99.526         |
| 2     | 17.134               | 86733          | 1309         | 0.474          |
| Total |                      | 18279682       | 349458       | 100.000        |

**Figure S58.** HPLC traces of racemic **3ai** (reference) and chiral **3ai**. Area integration = 99.5:0.5 (99% ee).

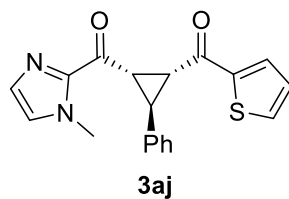

Chromatogram  
mV

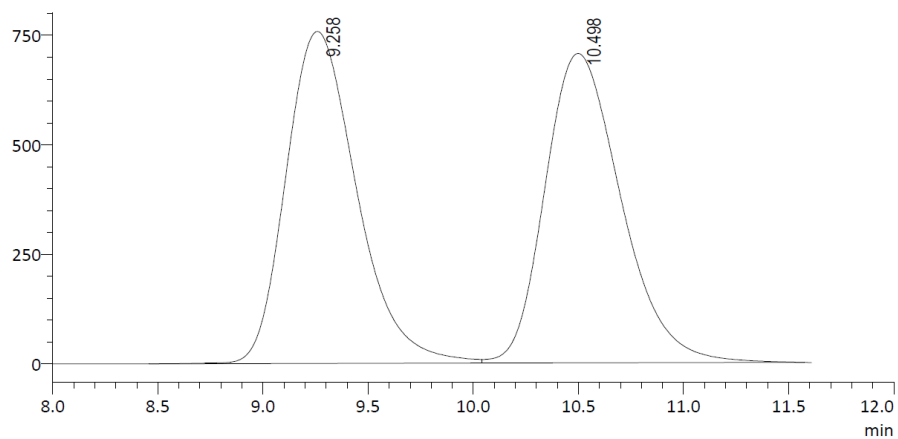

<Peak Table>

Detector A 254nm

| Peak# | Retention Time (min) | Area (mAU*min) | Height (mAU) | Area Ratio (%) |
|-------|----------------------|----------------|--------------|----------------|
| 1     | 9.258                | 17763317       | 758348       | 49.969         |
| 2     | 10.498               | 17785114       | 706668       | 50.031         |
| Total |                      | 35548431       | 1465015      | 100.000        |

Chromatogram  
mV

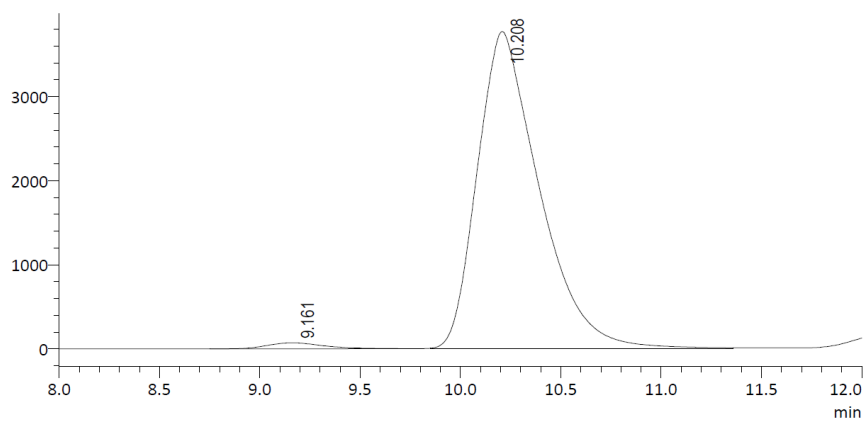

<Peak Table>

Detector A 254nm

| Peak# | Retention Time (min) | Area (mAU*min) | Height (mAU) | Area Ratio (%) |
|-------|----------------------|----------------|--------------|----------------|
| 1     | 9.161                | 1391434        | 71143        | 1.687          |
| 2     | 10.208               | 81077840       | 3775654      | 98.313         |
| Total |                      | 82469275       | 3846797      | 100.000        |

**Figure S59.** HPLC traces of racemic **3aj** (reference) and chiral **3aj**. Area integration = 1.7:98.3 (97% ee).

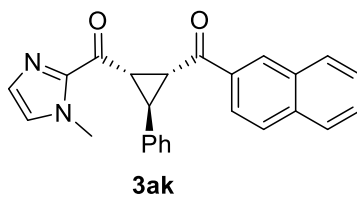

Chromatogram  
mV

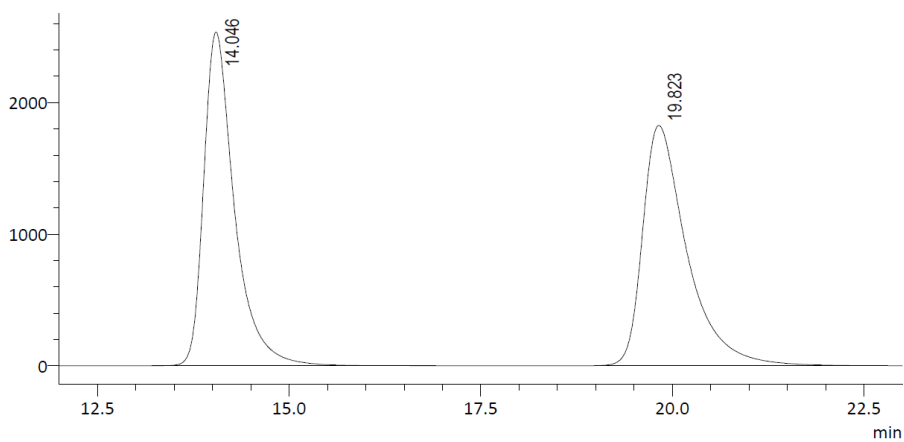

<Peak Table>

Detector A 254nm

| Peak# | Retention Time (min) | Area (mAU*min) | Height (mAU) | Area Ratio (%) |
|-------|----------------------|----------------|--------------|----------------|
| 1     | 14.046               | 71037947       | 2536275      | 49.210         |
| 2     | 19.823               | 73317933       | 1825214      | 50.790         |
| Total |                      | 144355879      | 4361488      | 100.000        |

Chromatogram  
mV

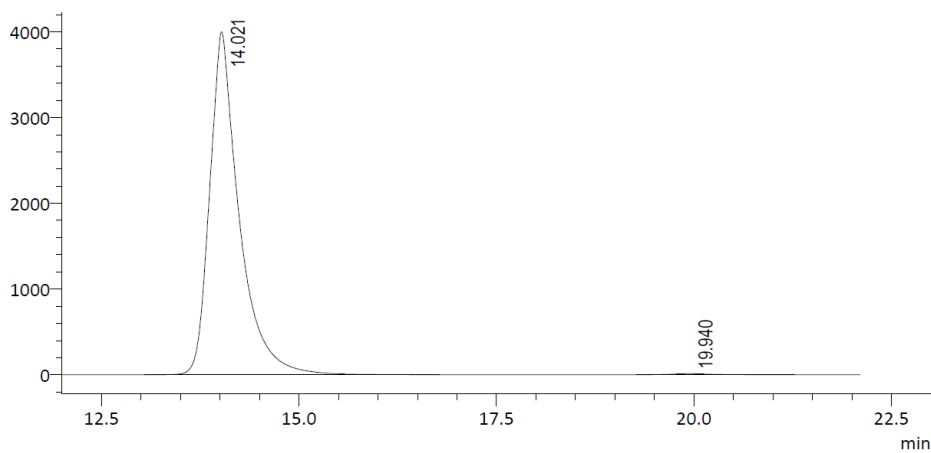

<Peak Table>

Detector A 254nm

| Peak# | Retention Time (min) | Area (mAU*min) | Height (mAU) | Area Ratio (%) |
|-------|----------------------|----------------|--------------|----------------|
| 1     | 14.021               | 104048916      | 3999214      | 99.535         |
| 2     | 19.940               | 485777         | 12859        | 0.465          |
| Total |                      | 104534693      | 4012073      | 100.000        |

**Figure S60.** HPLC traces of racemic **3ak** (reference) and chiral **3ak**. Area integration = 99.5:0.5 (99% ee).

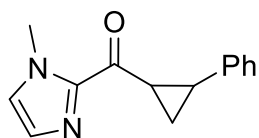

**3am**

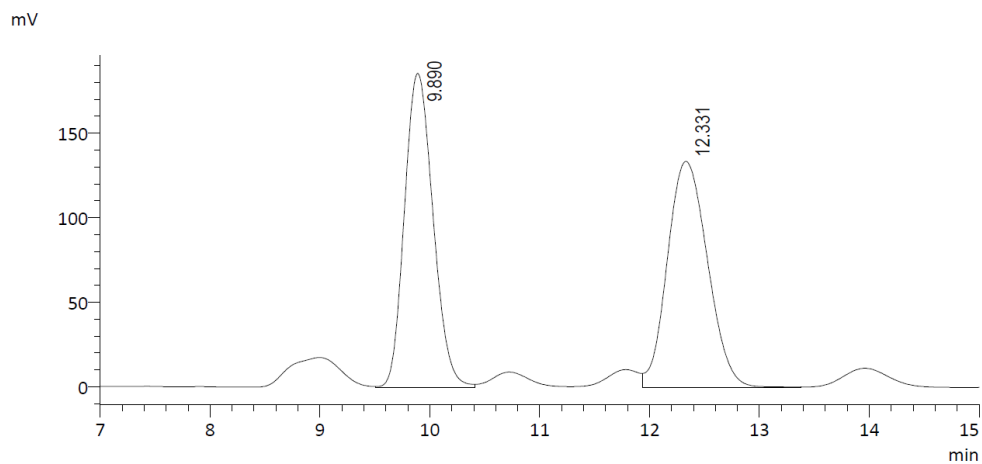

Integration Table  
Detector A 254nm

| Peak No. | Retention Time (min) | Area (mAU*s) | Height (mAU) | Area Ratio (%) |
|----------|----------------------|--------------|--------------|----------------|
| 1        | 9.890                | 3360513      | 185799       | 49.663         |
| 2        | 12.331               | 3406137      | 133717       | 50.337         |
| 总计       |                      | 6766650      | 319516       | 100.000        |

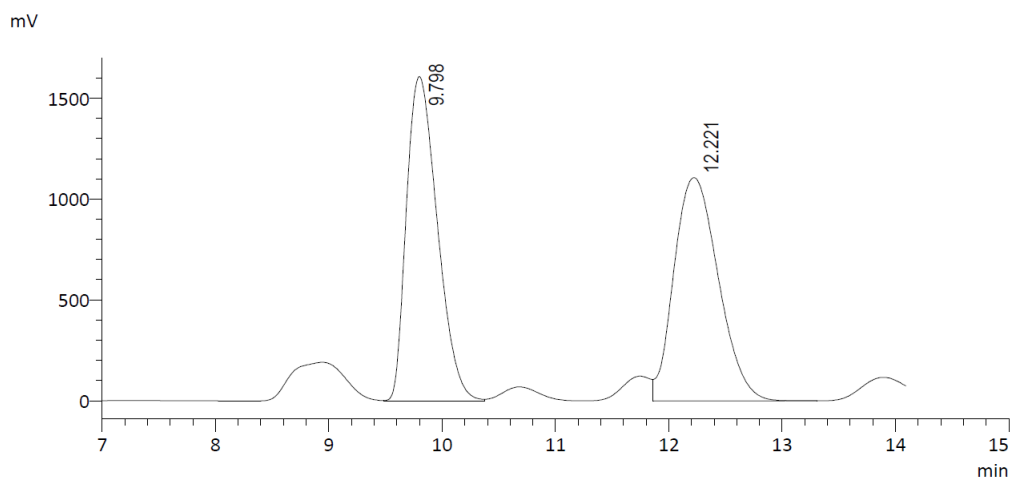

Integration Table  
Detector A 254nm

| Peak No. | Retention Time (min) | Area (mAU*s) | Height (mAU) | Area Ratio (%) |
|----------|----------------------|--------------|--------------|----------------|
| 1        | 9.798                | 30534359     | 1609038      | 50.323         |
| 2        | 12.221               | 30141947     | 1107236      | 49.677         |
| 总计       |                      | 60676306     | 2716274      | 100.000        |

**Figure S61.** HPLC traces of racemic **3am** (reference) and chiral **3am**. Area integration = 50:50 (0% ee).

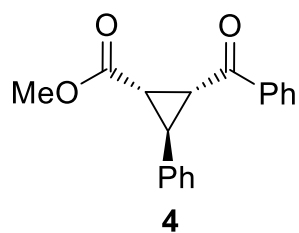

Chromatogram  
mV

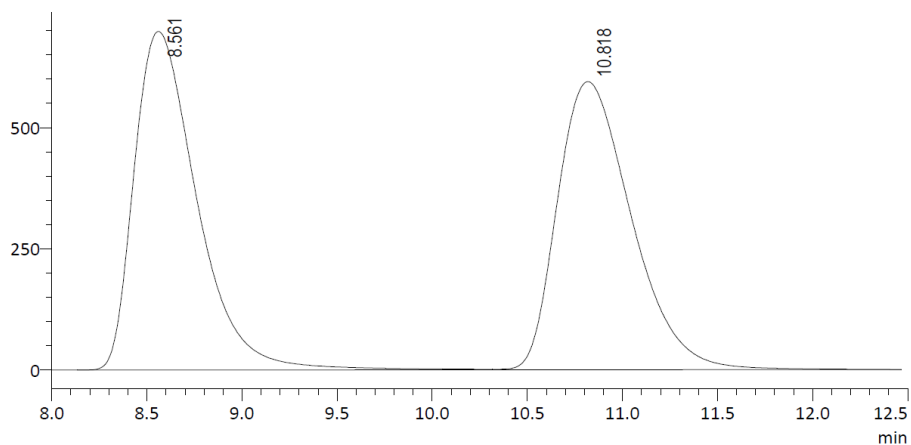

<Peak Table>

Detector A 254nm

| Peak# | Retention Time (min) | Area (mAU*min) | Height (mAU) | Area Ratio (%) |
|-------|----------------------|----------------|--------------|----------------|
| 1     | 8.561                | 16035823       | 698368       | 49.917         |
| 2     | 10.818               | 16088996       | 594306       | 50.083         |
| Total |                      | 32124819       | 1292674      | 100.000        |

Chromatogram  
mV

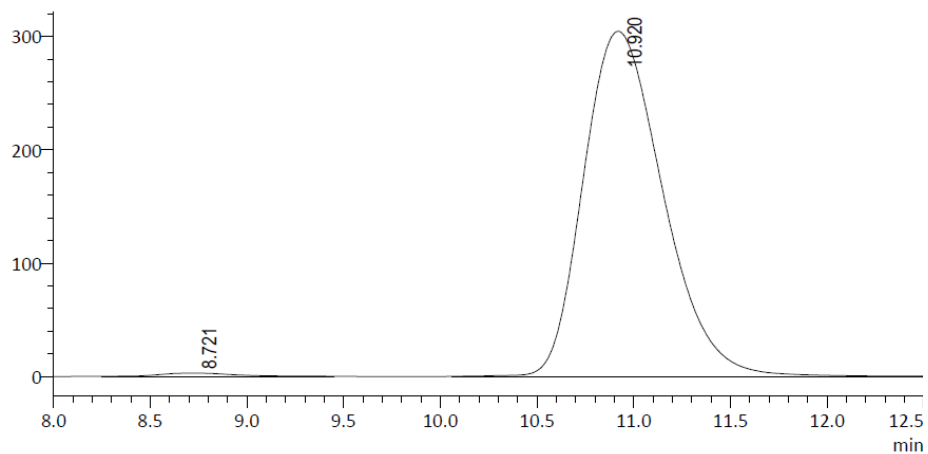

<Peak Table>

Detector A 254nm

| Peak# | Retention Time (min) | Area (mAU*min) | Height (mAU) | Area Ratio (%) |
|-------|----------------------|----------------|--------------|----------------|
| 1     | 8.721                | 91706          | 3210         | 1.039          |
| 2     | 10.920               | 8732181        | 304586       | 98.961         |
| Total |                      | 8823886        | 307796       | 100.000        |

**Figure S62.** HPLC traces of racemic **4** (reference) and chiral **4**. Area integration = 1.0:99.0 (98% ee).

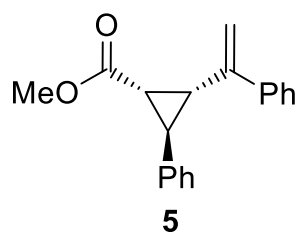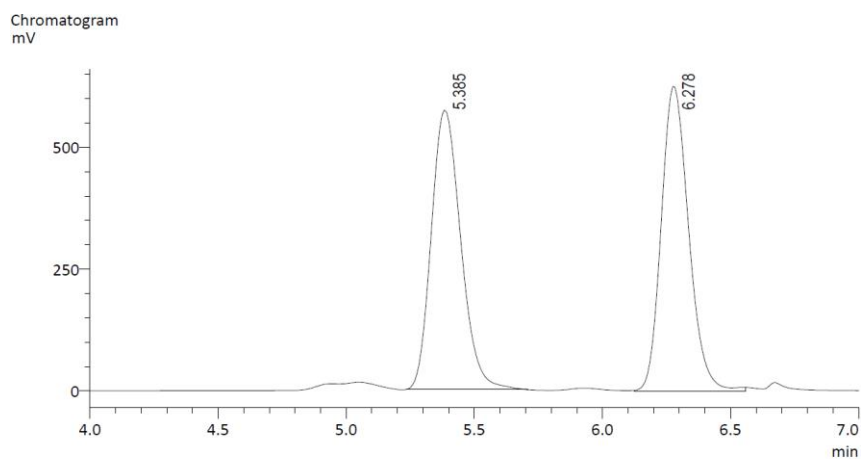

<Peak Table>  
Detector A 254nm

| Peak# | Retention Time (min) | Area (mAU*min) | Height (mAU) | Area Ratio (%) |
|-------|----------------------|----------------|--------------|----------------|
| 1     | 5.385                | 4554210        | 572966       | 49.388         |
| 2     | 6.278                | 4666992        | 626075       | 50.612         |
| Total |                      | 9221203        | 1199041      | 100.000        |

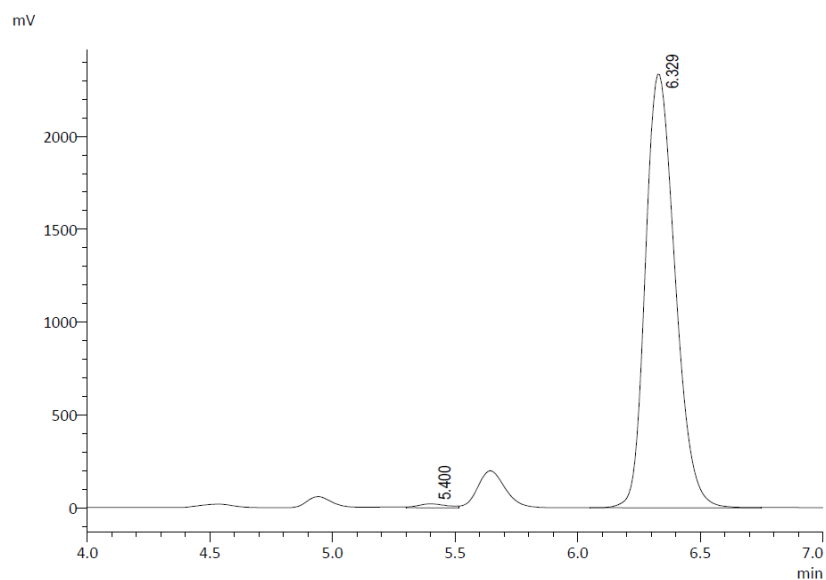

Integration Table  
Detector A 254nm

| Peak No. | Retention Time (min) | Area (mAU*min) | Height (mAU) | Area Ratio (%) |
|----------|----------------------|----------------|--------------|----------------|
| 1        | 5.400                | 171206         | 21066        | 0.863          |
| 2        | 6.329                | 19658119       | 2333428      | 99.137         |
| Total    |                      | 19829325       | 2354495      | 100.000        |

**Figure S63.** HPLC traces of racemic **5** (reference) and chiral **5**. Area integration = 0.9:99.1 (98% ee).



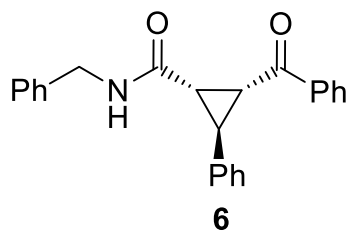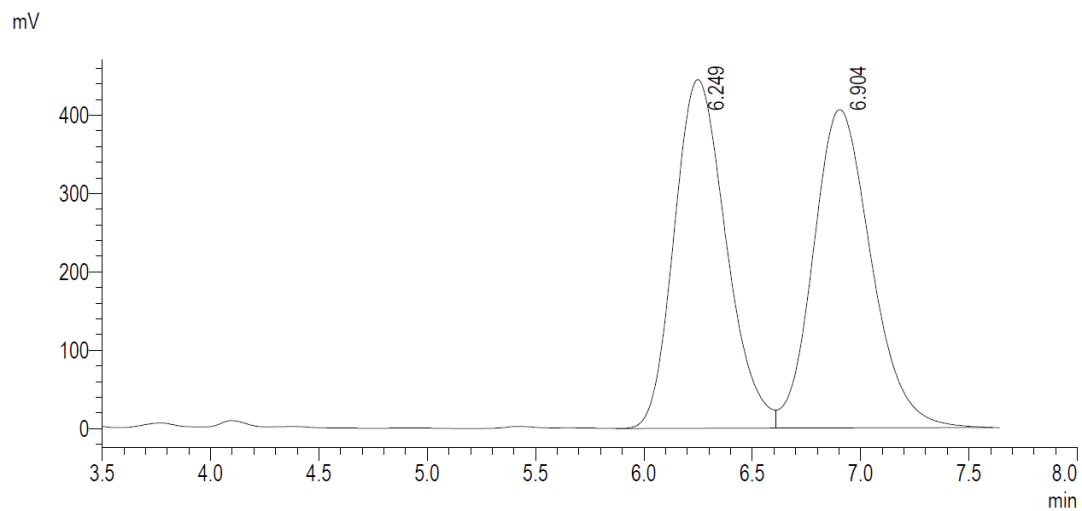

检测器A 254nm

| Peak# | Retention Time (min) | Area (mAu*min) | Height (mAU) | Area Ratio % |
|-------|----------------------|----------------|--------------|--------------|
| 1     | 6.249                | 7411262        | 445177       | 49.528       |
| 2     | 6.904                | 7552434        | 406337       | 50.472       |
| 总计    |                      | 14963697       | 851513       | 100.000      |

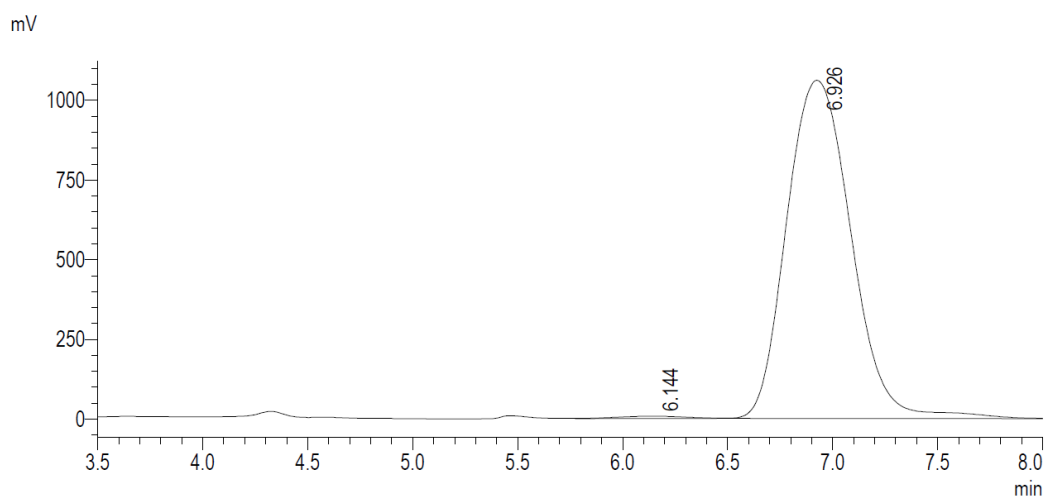

检测器A 254nm

| Peak# | Retention Time (min) | Area (mAu*min) | Height (mAU) | Area Ratio % |
|-------|----------------------|----------------|--------------|--------------|
| 1     | 6.144                | 159636         | 7169         | 0.698        |
| 2     | 6.926                | 22700992       | 1060776      | 99.302       |
| 总计    |                      | 22860628       | 1067945      | 100.000      |

**Figure S64.** HPLC traces of racemic **6** (reference) and chiral **6**. Area integration = 0.7:99.3 (99% ee).

## 8. Single Crystal X-Ray Diffraction Study

The single crystal for compound **3fa** was prepared from a mixture solvent of ethyl acetate and acetonitrile (v/v = 1:2). The data were collected on a Bruker APEX-II CCD equipped with molybdenum micro-focus X-ray sources ( $\lambda = 0.71073 \text{ \AA}$ ) at 150 K. The crystal structures were resolved by direct methods and all calculations were performed on the SHELXL-97 program package. All non-hydrogen atoms were refined anisotropically. Hydrogen atoms were added in the riding model and refined with isotropic thermal parameters. The data has been deposited at Cambridge Crystallographic Data Centre under **CCDC Deposition Number** 2131834. These data can be obtained free of charge from The Cambridge Crystallographic Data Centre via [www.ccdc.cam.ac.uk/data\\_request/cif](http://www.ccdc.cam.ac.uk/data_request/cif).

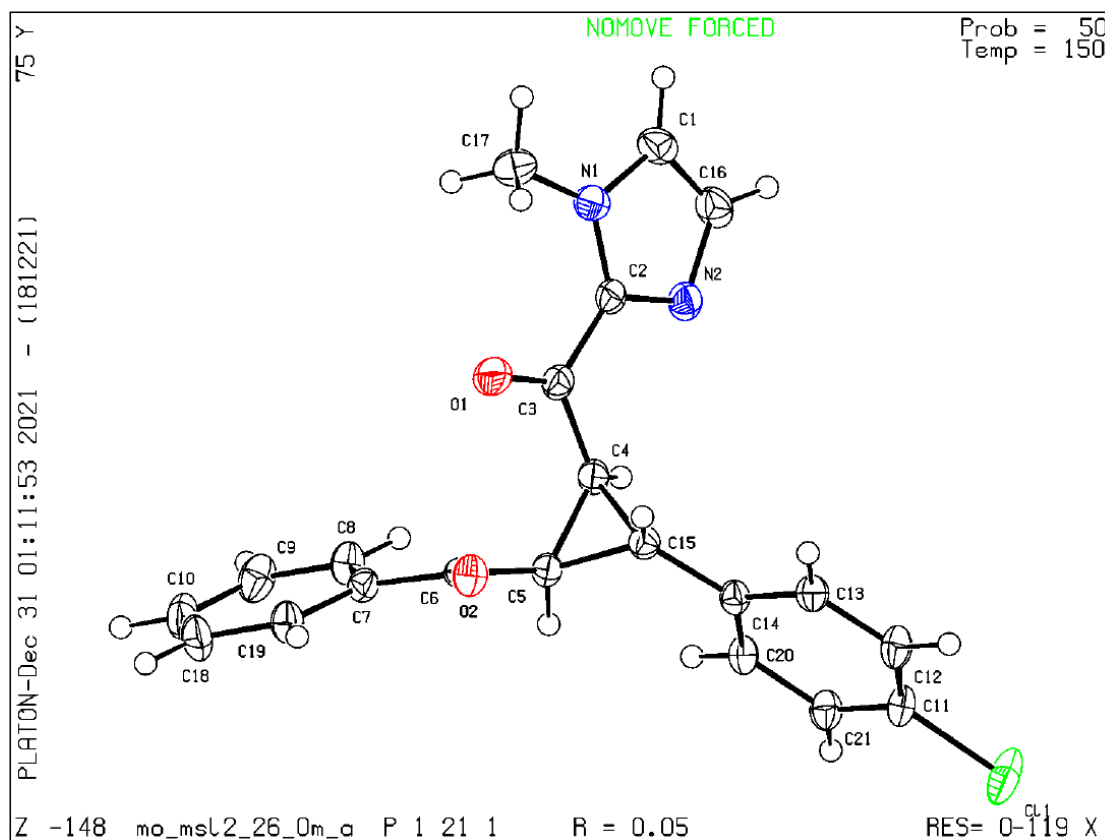

**Figure S65.** Crystal structure of **3fa** to verify absolute configuration.

**Table S1.** Crystal data and structure refinement for **3fa**.

|                                   |                                                                 |                                         |              |
|-----------------------------------|-----------------------------------------------------------------|-----------------------------------------|--------------|
| <b>Bond precision</b>             | <b>C-C = 0.0052 Å</b>                                           | <b>Z</b>                                | <b>2</b>     |
| <b>Wavelength</b>                 | 0.71073 Å                                                       | <b>μ (mm<sup>-1</sup>)</b>              | 0.228        |
|                                   | a = 5.7040(5)                                                   | <b>F000</b>                             | 380.0        |
|                                   | b = 17.4146(15)                                                 | <b>F000'</b>                            | 380.44       |
|                                   | c = 9.2460(8)                                                   |                                         |              |
| <b>Cell</b>                       |                                                                 | <b>h, k, l<sub>max</sub></b>            | 7, 22, 12    |
|                                   | α = 90                                                          |                                         |              |
|                                   | β = 99.371(3)                                                   |                                         |              |
|                                   | γ = 90                                                          |                                         |              |
| <b>Temperature</b>                | 150 K                                                           | <b>N<sub>ref</sub></b>                  | 4155         |
| <b>Volume</b>                     | 906.17(14)                                                      | <b>T<sub>min</sub>, T<sub>max</sub></b> | 0.518, 0.746 |
| <b>Crystal system</b>             | monoclinic                                                      | <b>Data completeness</b>                | 0.99         |
| <b>Space group</b>                | P2 <sub>1</sub>                                                 | <b>θ (max)</b>                          | 27.508       |
| <b>Hall group</b>                 | P 2yb                                                           | <b>R(reflections)</b>                   | 0.0518(3396) |
| <b>Moiety formula</b>             | C <sub>21</sub> H <sub>17</sub> ClN <sub>2</sub> O <sub>2</sub> | <b>wR2(reflections)</b>                 | 0.1202(4155) |
| <b>Sum formula</b>                | C <sub>21</sub> H <sub>17</sub> ClN <sub>2</sub> O <sub>2</sub> | <b>S</b>                                | 1.032        |
| <b>Mr</b>                         | 364.82                                                          | <b>N<sub>par</sub></b>                  | 236          |
| <b>Density (g/cm<sup>3</sup>)</b> | 1.337                                                           |                                         |              |

## 9. References

- [1] Wang, C.; Chen, L.-A.; Huo, H.; Shen, X.; Harms, K.; Gong, L.; Meggers, E. *Chem. Sci.* **2015**, *6*, 1094-1100.
- [2] Gong, J.; Li, S.-W.; Saira, Q.; Kang, Q. *Eur. J. Org. Chem.* **2017**, *25*, 3584-3593.
- [3] Lin, S.-X.; Sun, G.-J.; Kang, Q. *Chem. Commun.* **2017**, *53*, 7665-7668.
- [4] Huo, H.; Fu, C.; Harms, K.; Meggers, E. *J. Am. Chem. Soc.* **2014**, *136*, 2990-2993.
- [5] Mukherjee, S.; Mondal, S.; Patra, A.; Gonnade, R. G.; Biju, A. T. *Chem. Commun.* **2015**, *51*, 9559-9562.
- [6] Sibi, M.; Itoh, K. *J. Am. Chem. Soc.* **2007**, *129*, 8064-8065.
- [7] Nakamura, T.; Oshida, M.; Nomura, T.; Nakazaki, A.; Kobayashi, S. *Org. Lett.* **2007**, *9*, 5533-5536.
- [8] Singh, P. K.; Singh, V. K. *Org. Lett.* **2008**, *10*, 4121-4124.
- [9] Dias, R. M. P.; Burtoloso, A. C. B. *Org. Lett.* **2016**, *18*, 3034-3037.
- [10] Yuan, Z.; Fang, X.; Li, X.; Wu, J.; Yao, H.; Lin, A. *J. Org. Chem.* **2015**, *80*, 11123-11130.
- [11] Kakei, H.; Sone, T.; Sohtome, Y.; Matsunaga, S.; Shibasaki, M. *J. Am. Chem. Soc.* **2007**, *129*, 13410-13411.
- [12] Fenster, E.; Fehl, C.; Aube, J. *Org. Lett.* **2011**, *13*, 2614-2617.
- [13] Ye, C.-X.; Chen, S.; Han, F.; Xie, X.; Ivlev, S.; Houk, K. N.; Meggers, E. *Angew. Chem. Int. Ed.* **2020**, *59*, 13552-13556.
